# Supplementary material for: Copper-catalysed synthesis of trifluoromethyl allenes via fluoro-carboalkynylation of alkenes
Source: Royal Society of Chemistry journal article supplement (doi:10.1039/d1qo01823j), 2022-01-01

**Copper-Catalysed Synthesis of Trifluoromethyl Allenes via Fluoro-  
carboalkynylation of Alkenes**

**(Supporting Information)**

Mengning Wang,<sup>a</sup> Qiuzhu Wang,<sup>a</sup> Mengtao Ma<sup>a</sup> and Binlin Zhao,<sup>\*a</sup>

<sup>a</sup>Department of Chemistry and Materials Science, College of Science, Nanjing Forestry  
University, Nanjing 210037, China.

|                                                                         |    |
|-------------------------------------------------------------------------|----|
| 1. General Information.....                                             | 2  |
| 2. General Procedures for the Synthesis of Trifluoromethyl Allenes..... | 2  |
| 3. Characterization Data of the Products 4.....                         | 3  |
| 4. Mechanistic Experiments.....                                         | 18 |
| 5. Copies of NMR Spectra.....                                           | 21 |

## 1. General Information.

Unless otherwise noted, all reactions were performed under an argon atmosphere using flame-dried glassware. All new compounds were fully characterized. NMR-spectra were recorded on ARX-400 MHz or a ARX-600 Associated.  $^1\text{H}$  NMR spectra data were reported as  $\delta$  values in ppm relative to chloroform ( $\delta$  7.26) if collected in  $\text{CDCl}_3$ .  $^{13}\text{C}$  NMR spectra data were reported as  $\delta$  values in ppm relative to chloroform ( $\delta$  77.00).  $^1\text{H}$  NMR coupling constants were reported in Hz, and multiplicity was indicated as follows: s (singlet); d (doublet); t (triplet); q (quartet); quint (quintet); m (multiplet); dd (doublet of doublets); ddd (doublet of doublet of doublets); dddd (doublet of doublet of doublet of doublets); dt (doublet of triplets); td (triplet of doublets); ddt (doublet of doublet of triplets); dq (doublet of quartets); app (apparent); br (broad). Mass spectra were conducted at Micromass Q-ToF instrument (ESI) and Agilent Technologies 5973N (EI). All reactions were carried out in flame-dried 25-mL Schlenk tubes with Teflon screw caps under argon. Unless otherwise noted, materials obtained from commercial suppliers were used without further purification.

## 2. General Procedures for the Synthesis of Trifluoromethyl Allenes.

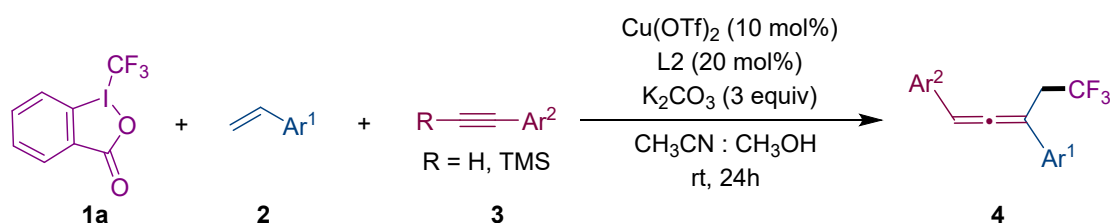

Flame-dried 10 mL Schlenk tube filled with argon, Togni's reagent II (**1a**) (0.3 mmol, 1.5 equiv), alkenes **2** (0.2 mmol, 1.0 equiv), alkynes **3** (0.3 mmol, 1.5 equiv),  $\text{Cu}(\text{OTf})_2$  (0.02 mmol, 10 mol%), 2,2':6',2''-terpyridine (0.04 mmol, 20 mol%),  $\text{K}_2\text{CO}_3$  (0.6 mmol, 3.0 equiv), absolute dry  $\text{CH}_3\text{CN}$  (0.3 mL) and absolute dry  $\text{CH}_3\text{OH}$  (0.7 mL) were added under  $\text{N}_2$ . The formed mixture was stirred at room temperature under  $\text{N}_2$  for 24 h as monitored by TLC. The solvent was removed under vacuum directly.

The crude product was purified by flash column chromatography on silica gel (eluent: PE/EA) to afford the product **4**.

### 3. Characterization Data of the Products **4**.

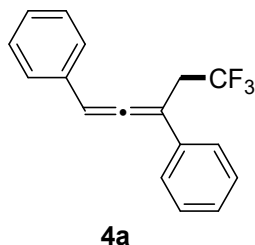

**(5,5,5-Trifluoropenta-1,2-diene-1,3-diyl)dibenzene (4a)**: colorless oil, 39.8 mg (73% yield).  $^1\text{H NMR}$  (400 MHz,  $\text{CDCl}_3$ )  $\delta$  7.48 – 7.44 (m, 2H), 7.40 – 7.33 (m, 6H), 7.30 – 7.27 (m, 2H), 6.67 (s, 1H), 3.50 – 3.30 (m, 2H);  $^{13}\text{C NMR}$  (101 MHz,  $\text{CDCl}_3$ )  $\delta$  208.7, 134.5, 132.9, 128.8, 128.7, 127.7, 127.6, 127.2, 126.0, 125.9 (q,  $J = 277.5$  Hz), 100.3 (q,  $J = 3.0$  Hz), 98.6, 35.3 (q,  $J = 29.7$  Hz);  $^{19}\text{F NMR}$  (376 MHz,  $\text{CDCl}_3$ )  $\delta$  -64.5; **HRMS m/z (ESI)** calcd for  $\text{C}_{17}\text{H}_{14}\text{F}_3$  ( $\text{M} + \text{H}$ ) $^+$  275.1042, found 275.1045.

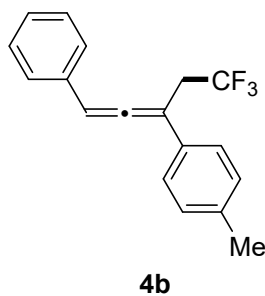

**1-Methyl-4-(5,5,5-trifluoro-1-phenylpenta-1,2-dien-3-yl)benzene (4b)**: colorless oil, 45.4 mg (79% yield).  $^1\text{H NMR}$  (400 MHz,  $\text{CDCl}_3$ )  $\delta$  7.40 – 7.35 (m, 6H), 7.31 – 7.25 (m, 1H), 7.19 (d,  $J = 8.0$  Hz, 2H), 6.66 (s, 1H), 7.47 – 7.33 (m, 2H), 2.37 (s, 3H);  $^{13}\text{C NMR}$  (101 MHz,  $\text{CDCl}_3$ )  $\delta$  208.5, 137.5, 133.1, 131.5, 129.4, 128.8, 127.6, 127.2, 125.9 (d,  $J = 277.5$  Hz), 125.9, 100.2 (q,  $J = 3.1$  Hz), 98.5, 35.3 (q,  $J = 29.7$  Hz), 21.1;  $^{19}\text{F NMR}$  (376 MHz,  $\text{CDCl}_3$ )  $\delta$  -64.5; **HRMS m/z (ESI)** calcd for  $\text{C}_{18}\text{H}_{15}\text{F}_3\text{Na}$  ( $\text{M} + \text{Na}$ ) $^+$  331.1018, found 331.1022.

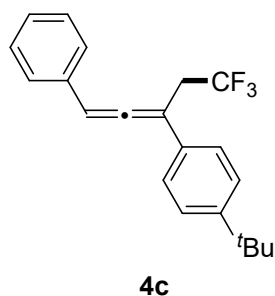

**1-(*tert*-Butyl)-4-(5,5,5-trifluoro-1-phenylpenta-1,2-dien-3-yl)benzene (4c):** colorless oil, 52.3 mg (79% yield).  $^1\text{H NMR}$  (400 MHz,  $\text{CDCl}_3$ )  $\delta$  7.43 – 7.32 (m, 8H), 7.27 (dd,  $J = 8.7, 5.1$  Hz, 1H), 6.66 (s, 1H), 3.50 – 3.29 (m, 2H), 1.34 (s, 9H);  $^{13}\text{C NMR}$  (101 MHz,  $\text{CDCl}_3$ )  $\delta$  208.6, 150.8, 133.1, 131.4, 128.8, 127.6, 127.2, 125.9 (d,  $J = 277.5$  Hz), 125.7, 125.7, 100.0 (q,  $J = 3.2$  Hz), 98.6, 35.3 (q,  $J = 29.7$  Hz), 34.5, 31.2;  $^{19}\text{F NMR}$  (376 MHz,  $\text{CDCl}_3$ )  $\delta$  -64.5; HRMS  $m/z$  (ESI) calcd for  $\text{C}_{21}\text{H}_{22}\text{F}_3$  ( $\text{M} + \text{H}$ ) $^+$  331.1668, found 331.1673.

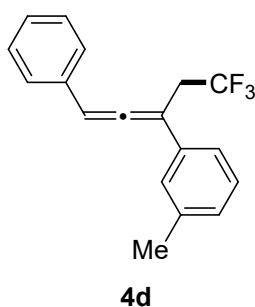

**1-Methyl-3-(5,5,5-trifluoro-1-phenylpenta-1,2-dien-3-yl)benzene (4d):** colorless oil, 46.2 mg (80% yield).  $^1\text{H NMR}$  (400 MHz,  $\text{CDCl}_3$ )  $\delta$  7.42 – 7.34 (m, 4H), 7.30 – 7.26 (m, 4H), 7.12 – 7.10 (m, 1H), 6.67 (s, 1H), 3.49 – 3.28 (m, 2H), 2.37 (s, 3H);  $^{13}\text{C NMR}$  (101 MHz,  $\text{CDCl}_3$ )  $\delta$  208.6, 138.4, 134.4, 133.0, 128.8, 128.6, 128.5, 127.7, 127.2, 126.7, 125.9 (q,  $J = 277.5$  Hz), 123.1, 100.3 (q,  $J = 3.1$  Hz), 98.5, 35.4 (q,  $J = 29.7$  Hz), 21.5;  $^{19}\text{F NMR}$  (376 MHz,  $\text{CDCl}_3$ )  $\delta$  -64.5; HRMS  $m/z$  (ESI) calcd for  $\text{C}_{18}\text{H}_{16}\text{F}_3$  ( $\text{M} + \text{H}$ ) $^+$  289.1199, found 289.1203.

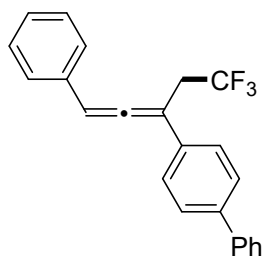

**4e**

**4-(5,5,5-Trifluoro-1-phenylpenta-1,2-dien-3-yl)-1,1'-biphenyl (4e):** colorless oil, 44.2 mg (63% yield).  $^1\text{H NMR}$  (400 MHz,  $\text{CDCl}_3$ )  $\delta$  7.65 – 7.58 (m, 4H), 7.53 (d,  $J = 8.4$  Hz, 2H), 7.46 (t,  $J = 7.6$  Hz, 2H), 7.43 – 7.35 (m, 5H), 7.29 (t,  $J = 6.9$  Hz, 1H), 6.71 (s, 1H), 3.52 – 3.35 (m, 2H);  $^{13}\text{C NMR}$  (101 MHz,  $\text{CDCl}_3$ )  $\delta$  209.0, 140.5, 140.4, 133.3, 132.8, 128.9, 128.8, 127.8, 127.5, 127.4, 127.2, 127.0, 126.4, 125.9 (q,  $J = 277.4$  Hz), 100.1 (q,  $J = 3.0$  Hz), 98.8, 35.3 (q,  $J = 29.7$  Hz);  $^{19}\text{F NMR}$  (376 MHz,  $\text{CDCl}_3$ )  $\delta$  -64.4; **HRMS m/z (ESI)** calcd for  $\text{C}_{23}\text{H}_{18}\text{F}_3$  ( $\text{M} + \text{H}$ ) $^+$  351.1355, found 351.1356.

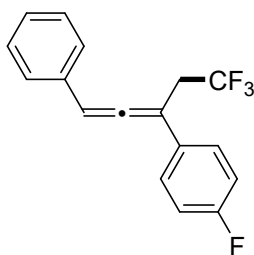

**4f**

**1-Fluoro-4-(5,5,5-trifluoro-1-phenylpenta-1,2-dien-3-yl)benzene (4f):** colorless oil, 35.7 mg (61% yield).  $^1\text{H NMR}$  (400 MHz,  $\text{CDCl}_3$ )  $\delta$  7.43 – 7.32 (m, 6H), 7.30 – 7.25 (m, 1H), 7.04 (t,  $J = 8.6$  Hz, 2H), 6.65 (s, 1H), 3.45 – 3.27 (m, 2H);  $^{13}\text{C NMR}$  (101 MHz,  $\text{CDCl}_3$ )  $\delta$  208.5 (d,  $J = 1.5$  Hz), 162.3 (d,  $J = 247.5$  Hz), 132.7, 130.5 (d,  $J = 3.5$  Hz), 128.8, 127.8, 127.7 (d,  $J = 8.1$  Hz), 127.2, 125.8 (q,  $J = 277.8$  Hz), 115.7 (d,  $J = 21.8$  Hz), 99.5 (q,  $J = 3.3$  Hz), 98.7, 35.6 (q,  $J = 29.8$  Hz);  $^{19}\text{F NMR}$  (376 MHz,  $\text{CDCl}_3$ )  $\delta$  -64.4, -114.5; **HRMS m/z (ESI)** calcd for  $\text{C}_{17}\text{H}_{12}\text{F}_4\text{Na}$  ( $\text{M} + \text{Na}$ ) $^+$  315.0767, found 315.0769.

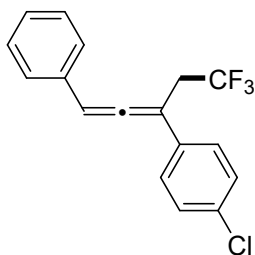

**4g**

**1-Chloro-4-(5,5,5-trifluoro-1-phenylpenta-1,2-dien-3-yl)benzene (4g):** colorless oil, 31.8 mg (52% yield).  $^1\text{H NMR}$  (400 MHz,  $\text{CDCl}_3$ )  $\delta$  7.54 – 7.25 (m, 9H), 6.70 (s, 1H), 3.47 – 3.29 (m, 2H);  $^{13}\text{C NMR}$  (101 MHz,  $\text{CDCl}_3$ )  $\delta$  208.8, 133.5, 133.0, 132.5, 128.9, 128.9, 127.9, 127.3, 127.2, 125.7 (q,  $J = 277.6$  Hz), 99.6 (q,  $J = 3.4$  Hz), 98.9, 35.3 (q,  $J = 29.9$  Hz);  $^{19}\text{F NMR}$  (376 MHz,  $\text{CDCl}_3$ )  $\delta$  -64.5; HRMS  $m/z$  (ESI) calcd for  $\text{C}_{17}\text{H}_{12}\text{ClF}_3\text{Na}$  ( $\text{M} + \text{Na}$ ) $^+$  331.0472, found 331.0475.

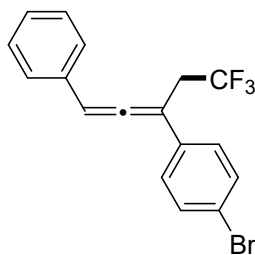

**4h**

**1-Bromo-4-(5,5,5-trifluoro-1-phenylpenta-1,2-dien-3-yl)benzene (4h):** colorless oil, 30.2 mg (43% yield).  $^1\text{H NMR}$  (400 MHz,  $\text{CDCl}_3$ )  $\delta$  7.50 – 7.43 (m, 2H), 7.35 (d,  $J = 4.3$  Hz, 4H), 7.31 – 7.25 (m, 3H), 6.66 (s, 1H), 3.44 – 3.26 (m, 2H);  $^{13}\text{C NMR}$  (101 MHz,  $\text{CDCl}_3$ )  $\delta$  208.8, 133.5, 132.4, 131.8, 128.9, 127.9, 127.6, 127.2, 125.7 (q,  $J = 277.6$  Hz), 121.6, 99.6 (q,  $J = 3.4$  Hz), 99.0, 35.3 (q,  $J = 29.9$  Hz);  $^{19}\text{F NMR}$  (376 MHz,  $\text{CDCl}_3$ )  $\delta$  -64.5; HRMS  $m/z$  (ESI) calcd for  $\text{C}_{17}\text{H}_{13}\text{BrF}_3$  ( $\text{M} + \text{H}$ ) $^+$  353.0147, found 353.0148.

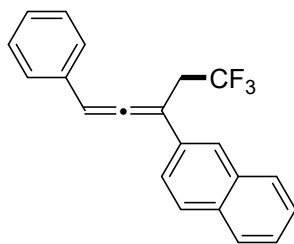

4i

**2-(5,5,5-Trifluoro-1-phenylpenta-1,2-dien-3-yl)naphthalene (4i):** colorless oil, 41.6 mg (64% yield).  $^1\text{H NMR}$  (400 MHz,  $\text{CDCl}_3$ )  $\delta$  7.88 – 7.76 (m, 4H), 7.61 (dd,  $J = 8.7$ , 1.8 Hz, 1H), 7.54 – 7.46 (m, 2H), 7.43 – 7.35 (m, 4H), 7.32 – 7.26 (m, 1H), 6.75 (s, 1H), 3.61 – 3.44 (m, 2H);  $^{13}\text{C NMR}$  (101 MHz,  $\text{CDCl}_3$ )  $\delta$  209.3, 133.5, 132.9, 132.7, 131.8, 128.9, 128.3, 128.1, 127.8, 127.6, 127.3, 126.4, 126.2, 125.9 (q,  $J = 277.5$  Hz), 124.7, 124.1, 100.5 (q,  $J = 3.2$  Hz), 99.0, 35.3 (q,  $J = 29.8$  Hz);  $^{19}\text{F NMR}$  (376 MHz,  $\text{CDCl}_3$ )  $\delta$  -64.3; **HRMS m/z (ESI)** calcd for  $\text{C}_{21}\text{H}_{16}\text{F}_3$  ( $\text{M} + \text{H}$ ) $^+$  325.1199, found 325.1203.

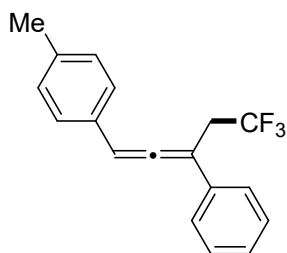

4j

**1-Methyl-4-(5,5,5-trifluoro-3-phenylpenta-1,2-dien-1-yl)benzene (4j):** colorless oil, 40.4 mg (70% yield).  $^1\text{H NMR}$  (400 MHz,  $\text{CDCl}_3$ )  $\delta$  7.44 (d,  $J = 7.7$  Hz, 2H), 7.35 (t,  $J = 7.6$  Hz, 2H), 7.30 – 7.25 (m, 3H), 7.16 (d,  $J = 7.9$  Hz, 2H), 6.65 (s, 1H), 3.48 – 3.26 (m, 2H), 2.36 (s, 3H);  $^{13}\text{C NMR}$  (101 MHz,  $\text{CDCl}_3$ )  $\delta$  208.6, 137.6, 134.7, 132.4, 129.6, 128.7, 127.5, 127.1, 126.0, 125.9 (q,  $J = 277.5$  Hz), 100.1 (q,  $J = 3.1$  Hz), 98.4, 35.3 (q,  $J = 29.7$  Hz), 21.2;  $^{19}\text{F NMR}$  (376 MHz,  $\text{CDCl}_3$ )  $\delta$  -64.5; **HRMS m/z (ESI)** calcd for  $\text{C}_{18}\text{H}_{16}\text{F}_3$  ( $\text{M} + \text{H}$ ) $^+$  289.1199, found 289.1203.

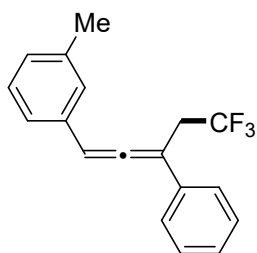

4k

**1-Methyl-3-(5,5,5-trifluoro-3-phenylpenta-1,2-dien-1-yl)benzene (4k):** colorless oil, 41.6 mg (72% yield).  $^1\text{H NMR}$  (400 MHz,  $\text{CDCl}_3$ )  $\delta$  7.46 (d,  $J = 7.6$  Hz, 2H), 7.37 (t,  $J = 7.6$  Hz, 2H), 7.32 – 7.25 (m, 2H), 7.19 (d,  $J = 6.2$  Hz, 2H), 7.10 (d,  $J = 7.4$  Hz, 2H), 6.65 (s, 1H), 3.49 – 3.32 (m, 2H), 2.36 (s, 3H);  $^{13}\text{C NMR}$  (101 MHz,  $\text{CDCl}_3$ )  $\delta$  208.8, 138.5, 134.6, 132.8, 128.72, 128.68, 128.6, 127.9, 127.6, 126.0, 125.9 (q,  $J = 277.5$  Hz), 124.3, 100.1 (q,  $J = 3.0$  Hz), 98.6, 35.3 (q,  $J = 29.7$  Hz), 21.3;  $^{19}\text{F NMR}$  (376 MHz,  $\text{CDCl}_3$ )  $\delta$  -64.5; **HRMS m/z (ESI)** calcd for  $\text{C}_{18}\text{H}_{16}\text{F}_3$  ( $\text{M} + \text{H}$ ) $^+$  289.1199, found 289.1200.

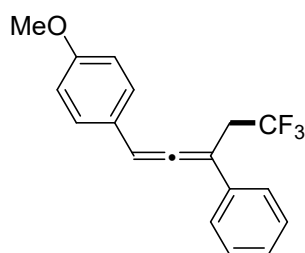

4l

**1-Methoxy-4-(5,5,5-trifluoro-3-phenylpenta-1,2-dien-1-yl)benzene (4l):** colorless oil, 37.8 mg (62% yield).  $^1\text{H NMR}$  (400 MHz,  $\text{CDCl}_3$ )  $\delta$  7.44 (d,  $J = 7.7$  Hz, 2H), 7.35 (t,  $J = 7.5$  Hz, 2H), 7.31 – 7.26 (m, 3H), 6.89 (d,  $J = 8.3$  Hz, 2H), 6.63 (s, 1H), 3.82 (s, 3H), 3.45 – 3.31 (m, 2H);  $^{13}\text{C NMR}$  (101 MHz,  $\text{CDCl}_3$ )  $\delta$  208.3, 159.3, 134.8, 128.7, 128.4, 127.5, 126.0, 125.9 (q,  $J = 277.5$  Hz), 125.1, 114.3, 100.1 (q,  $J = 3.2$  Hz), 98.1, 55.3, 35.4 (q,  $J = 29.6$  Hz);  $^{19}\text{F NMR}$  (376 MHz,  $\text{CDCl}_3$ )  $\delta$  -64.5; **HRMS m/z (ESI)** calcd for  $\text{C}_{18}\text{H}_{15}\text{F}_3\text{NaO}$  ( $\text{M} + \text{Na}$ ) $^+$  327.0967, found 327.0968.



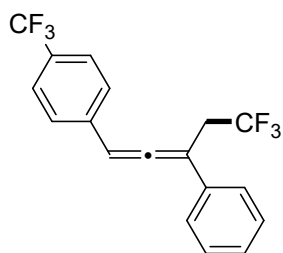

4m

**1-(5,5,5-Trifluoro-3-phenylpenta-1,2-dien-1-yl)-4-(trifluoromethyl)benzene (4m):** colorless oil, 50.1 mg (73% yield).  $^1\text{H NMR}$  (600 MHz,  $\text{CDCl}_3$ )  $\delta$  7.59 (d,  $J = 8.1$  Hz, 2H), 7.46 (d,  $J = 8.1$  Hz, 2H), 7.42 (d,  $J = 7.7$  Hz, 2H), 7.37 (t,  $J = 7.7$  Hz, 2H), 7.30 (t,  $J = 7.3$  Hz, 1H), 6.69 (s, 1H), 3.47 – 3.32 (m, 2H);  $^{13}\text{C NMR}$  (151 MHz,  $\text{CDCl}_3$ )  $\delta$  209.3, 136.9, 133.8, 129.6 (q,  $J = 32.9$  Hz), 128.8, 128.0, 127.3, 126.0, 125.8 (q,  $J = 3.5$  Hz), 125.7 (d,  $J = 277.4$  Hz), 124.1 (d,  $J = 271.9$  Hz), 101.1 (q,  $J = 3.1$  Hz), 97.8, 35.2 (q,  $J = 29.9$  Hz);  $^{19}\text{F NMR}$  (565 MHz,  $\text{CDCl}_3$ )  $\delta$  -62.6, -64.6; **HRMS m/z (ESI)** calcd for  $\text{C}_{18}\text{H}_{12}\text{F}_6\text{Na}$  ( $\text{M} + \text{Na}$ ) $^+$  365.0735, found 365.0736.

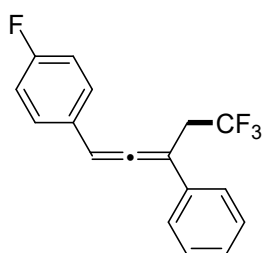

4n

**1-Fluoro-4-(5,5,5-trifluoro-3-phenylpenta-1,2-dien-1-yl)benzene (4n):** colorless oil, 58.8 mg (76% yield).  $^1\text{H NMR}$  (400 MHz,  $\text{CDCl}_3$ )  $\delta$  7.44 (d,  $J = 7.7$  Hz, 2H), 7.40 – 7.26 (m, 5H), 7.04 (t,  $J = 8.6$  Hz, 2H), 3.49 – 3.27 (m, 2H);  $^{13}\text{C NMR}$  (101 MHz,  $\text{CDCl}_3$ )  $\delta$  208.4 (d,  $J = 2.3$  Hz), 162.4 (d,  $J = 247.3$  Hz), 134.4, 128.9 (d,  $J = 3.4$  Hz), 128.7, 128.6, 127.7, 126.0, 125.8 (q,  $J = 277.5$  Hz), 115.8 (d,  $J = 21.9$  Hz), 100.5 (q,  $J = 3.1$  Hz), 97.7, 35.3 (q,  $J = 29.7$  Hz);  $^{19}\text{F NMR}$  (377 MHz,  $\text{CDCl}_3$ )  $\delta$  -64.5, -114.0; **HRMS m/z (ESI)** calcd for  $\text{C}_{17}\text{H}_{12}\text{F}_4\text{Na}$  ( $\text{M} + \text{Na}$ ) $^+$  315.0767, found 315.0769.

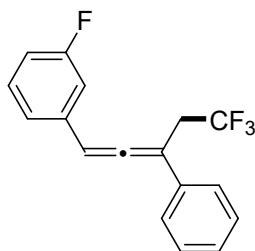

**4o**

**1-Fluoro-3-(5,5,5-trifluoro-3-phenylpenta-1,2-dien-1-yl)benzene (4o):** colorless oil, 37.2 mg (64% yield).  $^1\text{H NMR}$  (400 MHz,  $\text{CDCl}_3$ )  $\delta$  7.46 – 7.42 (m, 2H), 7.39 – 7.36 (m, 2H), 7.33 – 7.28 (m, 2H), 7.14 (d,  $J = 7.7$  Hz, 1H), 7.07 (dt,  $J = 9.9, 2.0$  Hz, 1H), 6.99 – 6.93 (m, 1H), 6.64 (s, 1H), 3.46 – 3.33 (m, 2H);  $^{13}\text{C NMR}$  (101 MHz,  $\text{CDCl}_3$ )  $\delta$  208.8, 163.2 (d,  $J = 245.7$  Hz), 135.4 (d,  $J = 7.6$  Hz), 134.1, 130.2 (d,  $J = 8.5$  Hz), 128.8, 127.9, 126.0, 125.8 (q,  $J = 277.5$  Hz), 122.9 (d,  $J = 2.7$  Hz), 114.6 (d,  $J = 21.3$  Hz), 113.7 (d,  $J = 22.3$  Hz), 100.8 (q,  $J = 3.1$  Hz), 98.0 (d,  $J = 2.5$  Hz), 35.3 (q,  $J = 29.8$  Hz);  $^{19}\text{F NMR}$  (377 MHz,  $\text{CDCl}_3$ )  $\delta$  -64.5, -113.0; **HRMS  $m/z$  (ESI)** calcd for  $\text{C}_{17}\text{H}_{13}\text{F}_4$  ( $\text{M} + \text{H}$ ) $^+$  293.0948, found 293.0947.

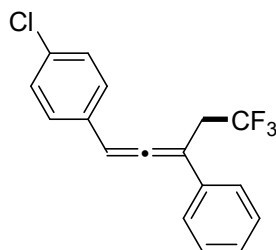

**4p**

**1-Chloro-4-(5,5,5-trifluoro-3-phenylpenta-1,2-dien-1-yl)benzene (4p):** colorless oil, 43.1 mg (70% yield).  $^1\text{H NMR}$  (400 MHz,  $\text{CDCl}_3$ )  $\delta$  7.43 (d,  $J = 7.8$  Hz, 2H), 7.37 (t,  $J = 7.5$  Hz, 2H), 7.32 – 7.28 (m, 5H), 6.63 (s, 1H), 3.45 – 3.32 (m, 2H);  $^{13}\text{C NMR}$  (101 MHz,  $\text{CDCl}_3$ )  $\delta$  208.7, 134.2, 133.4, 131.5, 129.0, 128.8, 128.3, 127.8, 126.0, 125.8 (q,  $J = 277.5$  Hz), 100.7 (q,  $J = 3.1$  Hz), 97.8, 35.3 (q,  $J = 29.8$  Hz);  $^{19}\text{F NMR}$  (377 MHz,  $\text{CDCl}_3$ )  $\delta$  -64.5; **HRMS  $m/z$  (ESI)** calcd for  $\text{C}_{17}\text{H}_{12}\text{ClF}_3\text{Na}$  ( $\text{M} + \text{Na}$ ) $^+$  331.0472, found 331.0475.

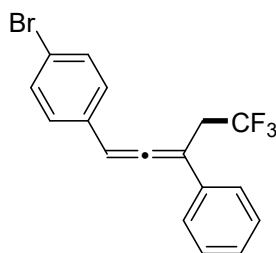

**4q**

**1-Bromo-4-(5,5,5-trifluoro-3-phenylpenta-1,2-dien-1-yl)benzene (4q):** colorless oil, 49.1 mg (70% yield).  $^1\text{H NMR}$  (400 MHz,  $\text{CDCl}_3$ )  $\delta$  7.49 – 7.40 (m, 4H), 7.38 – 7.35 (m, 2H), 7.31 – 7.26 (m, 1H), 7.23 (d,  $J = 8.5$  Hz, 2H), 6.61 (s, 1H), 3.48 – 3.29 (m, 2H);  $^{13}\text{C NMR}$  (101 MHz,  $\text{CDCl}_3$ )  $\delta$  208.7, 134.1, 132.0, 128.8, 128.6, 127.8, 126.0, 125.8 (q,  $J = 277.5$  Hz), 121.5, 100.8, 97.9, 35.2 (q,  $J = 29.7$  Hz);  $^{19}\text{F NMR}$  (377 MHz,  $\text{CDCl}_3$ )  $\delta$  -64.5; HRMS  $m/z$  (ESI) calcd for  $\text{C}_{17}\text{H}_{13}\text{BrF}_3$  ( $\text{M} + \text{H}$ ) $^+$  353.1047, found 353.1053.

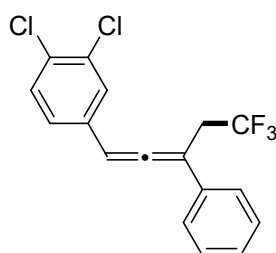

**4r**

**1,2-Dichloro-4-(5,5,5-trifluoro-3-phenylpenta-1,2-dien-1-yl)benzene (4r):** colorless oil, 52.8 mg (77% yield).  $^1\text{H NMR}$  (400 MHz,  $\text{CDCl}_3$ )  $\delta$  7.44 – 7.36 (m, 4H), 7.34 – 7.29 (m, 1H), 7.25 (t,  $J = 1.8$  Hz, 1H), 7.22 (d,  $J = 1.8$  Hz, 2H), 6.56 (s, 1H), 3.49 – 3.31 (m, 2H);  $^{13}\text{C NMR}$  (101 MHz,  $\text{CDCl}_3$ )  $\delta$  208.9, 136.3, 135.4, 133.5, 128.9, 128.1, 127.6, 126.1, 125.6 (q,  $J = 277.4$  Hz), 125.3, 101.5 (q,  $J = 3.0$  Hz), 97.0, 35.2 (q,  $J = 29.9$  Hz);  $^{19}\text{F NMR}$  (377 MHz,  $\text{CDCl}_3$ )  $\delta$  -64.5; HRMS  $m/z$  (ESI) calcd for  $\text{C}_{17}\text{H}_{12}\text{Cl}_2\text{F}_3$  ( $\text{M} + \text{H}$ ) $^+$  343.0263, found 343.0266.

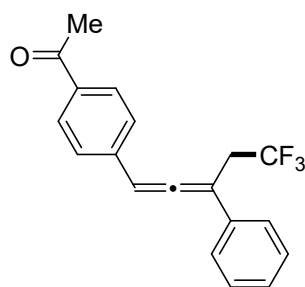

**4s**

**1-(4-(5,5,5-Trifluoro-3-phenylpenta-1,2-dien-1-yl)phenyl)ethan-1-one (4s):** colorless oil, 28.6 mg (45% yield). <sup>1</sup>H NMR (400 MHz, CDCl<sub>3</sub>) δ 7.93 (d, *J* = 8.3 Hz, 2H), 7.43 (dd, *J* = 7.7, 5.7 Hz, 4H), 7.36 (t, *J* = 7.6 Hz, 2H), 7.31 – 7.26 (m, 1H), 6.69 (s, 1H), 3.47 – 3.30 (m, 2H), 2.59 (s, 3H); <sup>13</sup>C NMR (101 MHz, CDCl<sub>3</sub>) δ 209.7, 197.4, 138.1, 136.2, 133.8, 129.0, 128.8, 128.0, 127.2, 126.0, 125.7 (q, *J* = 277.4 Hz), 98.1, 35.2 (q, *J* = 29.8 Hz), 26.6; <sup>19</sup>F NMR (377 MHz, CDCl<sub>3</sub>) δ -64.5; HRMS *m/z* (ESI) calcd for C<sub>19</sub>H<sub>16</sub>F<sub>3</sub>O (M + H)<sup>+</sup> 317.1148, found 317.1152.

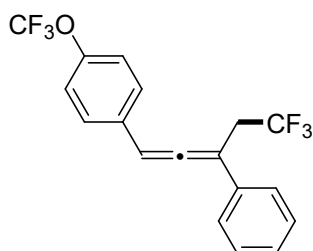

**4t**

**1-(5,5,5-Trifluoro-3-phenylpenta-1,2-dien-1-yl)-4-(trifluoromethoxy)benzene (4t):** colorless oil, 28.6 mg (45% yield). <sup>1</sup>H NMR (400 MHz, CDCl<sub>3</sub>) δ 7.45 – 7.34 (m, 6H), 7.32 – 7.27 (m, 1H), 7.19 (d, *J* = 8.0 Hz, 2H), 6.65 (s, 1H), 3.53 – 3.26 (m, 2H); <sup>13</sup>C NMR (101 MHz, CDCl<sub>3</sub>) δ 208.7, 148.6, 134.1, 131.8, 129.3, 128.8, 128.4, 127.9, 125.8 (q, *J* = 277.6 Hz), 120.5 (d, *J* = 257.0 Hz), 100.8 (d, *J* = 2.8 Hz), 97.6, 35.3 (q, *J* = 29.8 Hz); <sup>19</sup>F NMR (377 MHz, CDCl<sub>3</sub>) δ -57.9, -64.6; HRMS *m/z* (ESI) calcd for C<sub>18</sub>H<sub>13</sub>F<sub>6</sub>O (M + H)<sup>+</sup> 359.0865, found 359.0863.

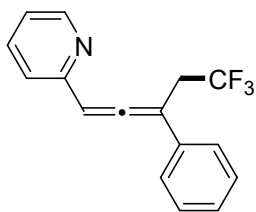

**4u**

**2-(5,5,5-Trifluoro-3-phenylpenta-1,2-dien-1-yl)pyridine (4u):** colorless oil, 34.5 mg (63% yield). **<sup>1</sup>H NMR (400 MHz, CDCl<sub>3</sub>)** δ 8.58 (d, *J* = 4.8 Hz, 1H), 7.62 (td, *J* = 7.7, 1.7 Hz, 1H), 7.48 – 7.43 (m, 3H), 7.36 (t, *J* = 7.6 Hz, 2H), 7.31 – 7.25 (m, 1H), 7.18 – 7.07 (m, 1H), 6.85 (s, 1H), 3.51 – 3.31 (m, 2H); **<sup>13</sup>C NMR (101 MHz, CDCl<sub>3</sub>)** δ 210.2, 153.3, 149.7, 136.5, 133.8, 128.8, 127.9, 126.1, 125.7 (q, *J* = 277.5 Hz), 122.1, 121.8, 100.8 (q, *J* = 3.1 Hz), 100.3, 35.2 (q, *J* = 30.0 Hz); **<sup>19</sup>F NMR (377 MHz, CDCl<sub>3</sub>)** δ -64.5; **HRMS m/z (ESI)** calcd for C<sub>16</sub>H<sub>13</sub>F<sub>3</sub>N (M + H)<sup>+</sup> 276.2817, found 276.2818.

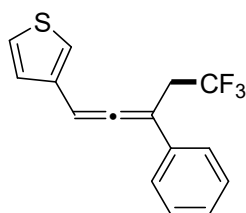

**4v**

**3-(5,5,5-Trifluoro-3-phenylpenta-1,2-dien-1-yl)thiophene (4v):** yellow oil, 37.4 mg (67% yield). **<sup>1</sup>H NMR (400 MHz, CDCl<sub>3</sub>)** δ 7.44 (d, *J* = 7.7 Hz, 2H), 7.36 (t, *J* = 7.6 Hz, 2H), 7.32 – 7.27 (m, 2H), 7.22 (d, *J* = 2.6 Hz, 1H), 7.13 (d, *J* = 5.0 Hz, 1H), 6.74 (s, 1H), 3.48 – 3.27 (m, 2H); **<sup>13</sup>C NMR (101 MHz, CDCl<sub>3</sub>)** δ 208.9, 134.6, 134.0, 128.7, 127.6, 126.3, 126.1, 125.9 (q, *J* = 277.5 Hz), 122.2, 99.4 (q, *J* = 3.2 Hz), 93.0, 35.4 (q, *J* = 29.6 Hz); **<sup>19</sup>F NMR (377 MHz, CDCl<sub>3</sub>)** δ -64.5; **HRMS m/z (ESI)** calcd for C<sub>15</sub>H<sub>11</sub>F<sub>3</sub>NaS (M + Na)<sup>+</sup> 303.0426, found 303.0422.

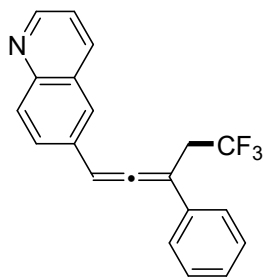

**4w**

**6-(5,5,5-Trifluoro-3-phenylpenta-1,2-dien-1-yl)quinoline (4w):** grey oil, 39.8 mg (61% yield).  $^1\text{H NMR}$  (400 MHz,  $\text{CDCl}_3$ )  $\delta$  7.44 (d,  $J = 7.7$  Hz, 2H), 7.36 (t,  $J = 7.6$  Hz, 2H), 7.32 – 7.27 (m, 2H), 7.22 (d,  $J = 2.6$  Hz, 1H), 7.13 (d,  $J = 5.0$  Hz, 1H), 6.74 (s, 1H), 3.48 – 3.27 (m, 2H);  $^{13}\text{C NMR}$  (101 MHz,  $\text{CDCl}_3$ )  $\delta$  208.9, 134.6, 134.0, 128.7, 127.6, 126.3, 126.1, 125.9 (q,  $J = 277.5$  Hz), 122.2, 99.4 (q,  $J = 3.2$  Hz), 93.0, 35.4 (q,  $J = 29.6$  Hz);  $^{19}\text{F NMR}$  (377 MHz,  $\text{CDCl}_3$ )  $\delta$  -64.5; HRMS  $m/z$  (ESI) calcd for  $\text{C}_{20}\text{H}_{15}\text{F}_3\text{N}$  ( $\text{M} + \text{H}$ ) $^+$  326.1151, found 326.1154.

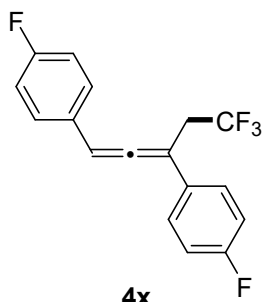

**4x**

**4,4'-(5,5,5-Trifluoropenta-1,2-diene-1,3-diyl)bis(fluorobenzene) (4x):** colorless oil, 44.5 mg (72% yield).  $^1\text{H NMR}$  (600 MHz,  $\text{CDCl}_3$ )  $\delta$  7.39 (dd,  $J = 8.6, 5.3$  Hz, 2H), 7.32 (dd,  $J = 8.5, 5.4$  Hz, 2H), 7.08 – 7.01 (m, 5H), 6.63 (s, 1H), 3.42 – 3.29 (m, 2H);  $^{13}\text{C NMR}$  (151 MHz,  $\text{CDCl}_3$ )  $\delta$  208.2 (d,  $J = 1.9$  Hz), 162.4 (d,  $J = 247.1$  Hz), 162.3 (d,  $J = 247.7$  Hz), 134.5 (d,  $J = 8.7$  Hz), 130.4 (d,  $J = 3.2$  Hz), 128.7 (d,  $J = 7.9$  Hz), 127.7 (d,  $J = 8.2$  Hz), 125.8 (d,  $J = 277.5$  Hz), 115.9 (d,  $J = 27.7$  Hz), 115.7 (d,  $J = 27.7$  Hz), 99.8 (d,  $J = 3.1$  Hz), 97.8, 35.6 (q,  $J = 29.8$  Hz);  $^{19}\text{F NMR}$  (565 MHz,  $\text{CDCl}_3$ )  $\delta$  -64.6, -113.8, -114.3; HRMS  $m/z$  (ESI) calcd for  $\text{C}_{17}\text{H}_{11}\text{F}_5\text{Na}$  ( $\text{M} + \text{Na}$ ) $^+$  333.0673, found 333.0674.

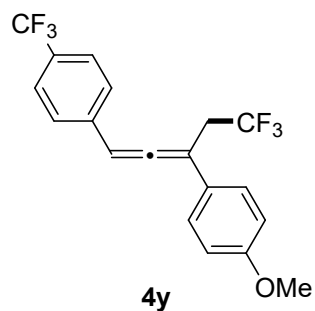

**1-Methoxy-4-(5,5,5-trifluoro-1-(4-(trifluoromethyl)phenyl)penta-1,2-dien-3-yl)benzene (4y):** colorless oil, 53.3 mg (72% yield).  $^1\text{H NMR}$  (600 MHz,  $\text{CDCl}_3$ )  $\delta$  7.58 (d,  $J = 8.1$  Hz, 2H), 7.45 (d,  $J = 8.1$  Hz, 2H), 7.35 (d,  $J = 8.7$  Hz, 2H), 6.91 (d,  $J = 8.8$  Hz, 2H), 6.66 (s, 1H), 3.82 (s, 3H), 3.44 – 3.29 (m, 2H);  $^{13}\text{C NMR}$  (151 MHz,  $\text{CDCl}_3$ )  $\delta$  208.9, 159.5, 137.2, 129.5 (q,  $J = 32.6$  Hz), 127.3, 127.2, 125.9, 125.8 (q,  $J = 277.5$  Hz), 125.7 (q,  $J = 4.0$  Hz), 124.1 (q,  $J = 272.0$  Hz), 114.3, 100.6 (q,  $J = 3.1$  Hz), 97.7, 55.3, 35.4 (q,  $J = 29.8$  Hz);  $^{19}\text{F NMR}$  (565 MHz,  $\text{CDCl}_3$ )  $\delta$  -62.5, -64.5; **HRMS m/z (ESI)** calcd for  $\text{C}_{19}\text{H}_{14}\text{F}_6\text{NaO}$  ( $\text{M} + \text{Na}$ ) $^+$  395.0841, found 395.0842.

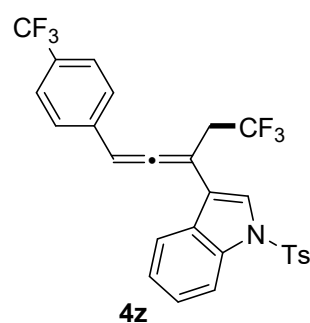

**1-Tosyl-3-(5,5,5-trifluoro-1-(4-(trifluoromethyl)phenyl)penta-1,2-dien-3-yl)-1H-indole (4z):** colorless oil, 80.2 mg (75% yield).  $^1\text{H NMR}$  (400 MHz,  $\text{CDCl}_3$ )  $\delta$  7.99 (d,  $J = 8.4$  Hz, 1H), 7.79 (d,  $J = 8.4$  Hz, 2H), 7.73 (d,  $J = 8.0$  Hz, 1H), 7.64 (s, 1H), 7.59 (d,  $J = 8.2$  Hz, 2H), 7.49 (d,  $J = 8.1$  Hz, 2H), 7.35 – 7.28 (m, 1H), 7.25 (d,  $J = 9.0$  Hz, 2H), 7.17 – 7.10 (m, 1H), 6.75 (s, 1H), 3.45 – 3.27 (m, 2H), 2.35 (s, 3H);  $^{13}\text{C NMR}$  (101 MHz,  $\text{CDCl}_3$ )  $\delta$  209.8, 145.3, 137.0, 135.4, 134.8, 130.0, 128.4, 127.6, 126.9, 125.8 (q,  $J = 4.0$  Hz), 125.6 (q,  $J = 277.5$  Hz), 125.4, 124.0 (q,  $J = 272.2$  Hz), 123.8, 123.6, 120.6, 116.1, 113.7, 98.0, 94.3 (q,  $J = 3.0$  Hz), 37.1 (q,  $J = 30.1$  Hz), 21.6;  $^{19}\text{F NMR}$  (376 MHz,  $\text{CDCl}_3$ )  $\delta$  -62.6, -64.3; **HRMS m/z (ESI)** calcd for  $\text{C}_{27}\text{H}_{20}\text{F}_6\text{NO}_2\text{S}$  ( $\text{M} + \text{H}$ ) $^+$  536.1113, found 536.1115.

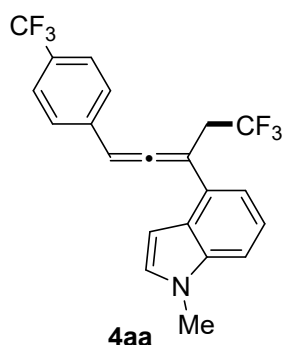

**1-Methyl-4-(5,5,5-trifluoro-1-(4-(trifluoromethyl)phenyl)penta-1,2-dien-3-yl)-1H-indole (4aa):** colorless oil, 40.9 mg (52% yield).  $^1\text{H NMR}$  (400 MHz,  $\text{CDCl}_3$ )  $\delta$  7.61 (d,  $J = 8.3$  Hz, 2H), 7.54 (d,  $J = 8.3$  Hz, 2H), 7.33 (d,  $J = 8.1$  Hz, 1H), 7.29 (d,  $J = 7.2$  Hz, 1H), 7.15 (d,  $J = 7.3$  Hz, 1H), 7.03 (d,  $J = 3.2$  Hz, 1H), 6.64 (s, 1H), 6.62 (d,  $J = 3.2$  Hz, 1H), 3.79 (s, 3H), 3.62 – 3.46 (m, 2H);  $^{13}\text{C NMR}$  (101 MHz,  $\text{CDCl}_3$ )  $\delta$  209.6, 137.7, 137.1, 129.3, 127.5, 125.9 (q,  $J = 277.7$  Hz), 125.7 (q,  $J = 3.6$  Hz), 124.2 (q,  $J = 271.9$  Hz), 121.5, 117.5, 109.6, 100.2, 96.5, 36.9 (q,  $J = 29.4$  Hz), 33.0;  $^{19}\text{F NMR}$  (376 MHz,  $\text{CDCl}_3$ )  $\delta$  -62.4, -64.4; **HRMS m/z (ESI)** calcd for  $\text{C}_{21}\text{H}_{15}\text{F}_6\text{NNa}$  ( $\text{M} + \text{Na}$ ) $^+$  418.1001, found 418.1006.

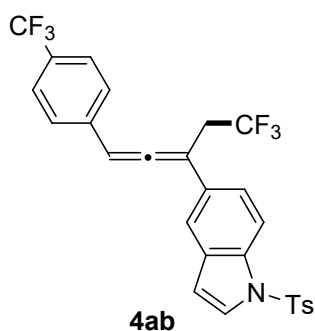

**1-Tosyl-5-(5,5,5-trifluoro-1-(4-(trifluoromethyl)phenyl)penta-1,2-dien-3-yl)-1H-indole (4ab):** colorless oil, 67.6 mg (63% yield).  $^1\text{H NMR}$  (400 MHz,  $\text{CDCl}_3$ )  $\delta$  7.94 (d,  $J = 8.8$  Hz, 1H), 7.75 (d,  $J = 8.4$  Hz, 2H), 7.59 – 7.52 (m, 4H), 7.44 (d,  $J = 8.1$  Hz, 2H), 7.38 (dd,  $J = 8.8, 1.8$  Hz, 1H), 7.22 (d,  $J = 8.3$  Hz, 2H), 6.68 (s, 1H), 6.63 (d,  $J = 3.6$  Hz, 1H), 3.51 – 3.31 (m, 2H), 2.34 (s, 3H);  $^{13}\text{C NMR}$  (101 MHz,  $\text{CDCl}_3$ )  $\delta$  209.2, 145.1, 136.9, 135.1, 134.3, 131.2, 129.9, 129.1, 127.3, 127.1, 126.8, 125.8 (q,  $J = 3.0$  Hz), 125.7 (q,  $J = 276.5$  Hz), 124.1 (q,  $J = 271.6$  Hz), 123.0, 118.6, 113.82, 108.94,



101.1 (q,  $J = 3.0$  Hz), 97.7, 35.5 (q,  $J = 29.8$  Hz), 21.6;  $^{19}\text{F}$  NMR (376 MHz,  $\text{CDCl}_3$ )  $\delta$  -62.5, -64.5; HRMS  $m/z$  (ESI) calcd for  $\text{C}_{27}\text{H}_{20}\text{F}_6\text{NO}_2\text{S}$  ( $\text{M} + \text{H}$ ) $^+$  536.1113, found 536.1113.

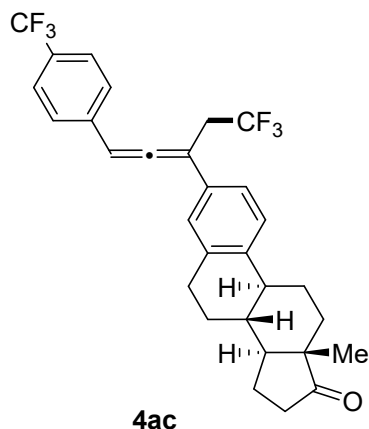

**(8R,9S,13S,14S)-13-Methyl-3-(5,5,5-trifluoro-1-(4-(trifluoromethyl)phenyl)penta-1,2-dien-3-yl)-6,7,8,9,11,12,13,14,15,16-decahydro-17H-cyclopenta[a] phenanthren-17-one (4ac):** colorless oil, 54.8 mg (53% yield).  $^1\text{H}$  NMR (600 MHz,  $\text{CDCl}_3$ )  $\delta$  7.57 (d,  $J = 8.1$  Hz, 2H), 7.44 (d,  $J = 8.1$  Hz, 2H), 7.29 (d,  $J = 8.3$  Hz, 1H), 7.20 (d,  $J = 8.2$  Hz, 1H), 7.13 (s, 1H), 6.66 (s, 1H), 3.44 – 3.30 (m, 1H), 2.91 (dd,  $J = 8.0, 3.2$  Hz, 2H), 2.51 (dd,  $J = 19.1, 8.8$  Hz, 1H), 2.41 (dd,  $J = 11.5, 4.7$  Hz, 1H), 2.34 – 2.27 (m, 1H), 2.15 (dt,  $J = 18.7, 8.9$  Hz, 1H), 2.05 (ddt,  $J = 19.2, 7.8, 4.3$  Hz, 2H), 2.00 – 1.94 (m, 1H), 1.67 – 1.42 (m, 8H), 0.91 (s, 3H);  $^{13}\text{C}$  NMR (151 MHz,  $\text{CDCl}_3$ )  $\delta$  209.21, 209.20, 139.9, 137.1, 137.0, 131.2, 129.5 (q,  $J = 32.2$  Hz), 127.3, 126.5, 125.9, 125.8 (q,  $J = 277.3$  Hz), 125.7 (q,  $J = 4.0$  Hz), 124.1 (q,  $J = 271.8$  Hz), 123.5, 100.8 (q,  $J = 7.4$  Hz), 97.7, 50.5, 47.9, 44.4, 38.1, 35.8, 35.2 (q,  $J = 29.6$  Hz), 31.5, 29.5, 26.4, 25.6, 21.6, 13.8;  $^{19}\text{F}$  NMR (565 MHz,  $\text{CDCl}_3$ )  $\delta$  -62.5, -64.5; HRMS  $m/z$  (ESI) calcd for  $\text{C}_{30}\text{H}_{29}\text{F}_6\text{O}$  ( $\text{M} + \text{H}$ ) $^+$  519.2117, found 519.2123.

## 4. Mechanistic Experiments

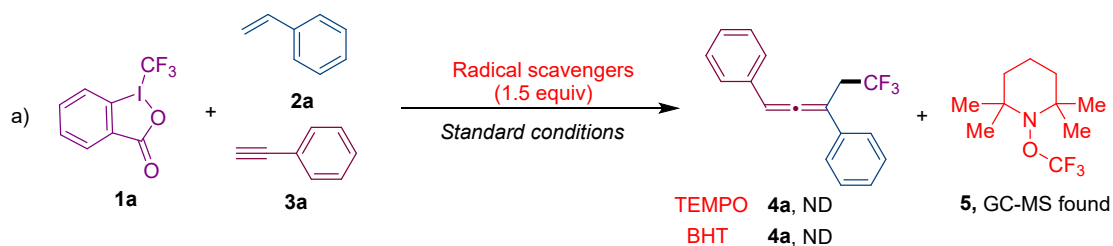

**TEMPO:** Flame-dried 10 mL Schlenk tube filled with argon, Togni's reagent II (**1a**) (0.3 mmol, 1.5 equiv), styrene (**2a**) (0.2 mmol, 1.0 equiv), phenylacetylene (**3a**) (0.3 mmol, 1.5 equiv), Cu(OTf)<sub>2</sub> (0.02 mmol, 10 mol%), 2,2':6',2''-terpyridine (0.04 mmol, 20 mol%), K<sub>2</sub>CO<sub>3</sub> (0.6 mmol, 3.0 equiv), TEMPO (0.3 mmol, 1.5 equiv), absolute dry CH<sub>3</sub>CN (0.3 mL) and absolute dry CH<sub>3</sub>OH (0.7 mL) were added under N<sub>2</sub>. The formed mixture was stirred at room temperature under N<sub>2</sub> for 24 h. The reaction mixture was analyzed by GC-MS showing that no desired product **4a** was formed and CF<sub>3</sub>-TEMPO adduct **5** was detected.

**BHT:** Flame-dried 10 mL Schlenk tube filled with argon, Togni's reagent II (**1a**) (0.3 mmol, 1.5 equiv), styrene (**2a**) (0.2 mmol, 1.0 equiv), phenylacetylene (**3a**) (0.3 mmol, 1.5 equiv), Cu(OTf)<sub>2</sub> (0.02 mmol, 10 mol%), 2,2':6',2''-terpyridine (0.04 mmol, 20 mol%), K<sub>2</sub>CO<sub>3</sub> (0.6 mmol, 3.0 equiv), BHT (0.3 mmol, 1.5 equiv), absolute dry CH<sub>3</sub>CN (0.3 mL) and absolute dry CH<sub>3</sub>OH (0.7 mL) were added under N<sub>2</sub>. The formed mixture was stirred at room temperature under N<sub>2</sub> for 24 h. The reaction mixture was analyzed by GC-MS showing that no desired product **4a** was formed.

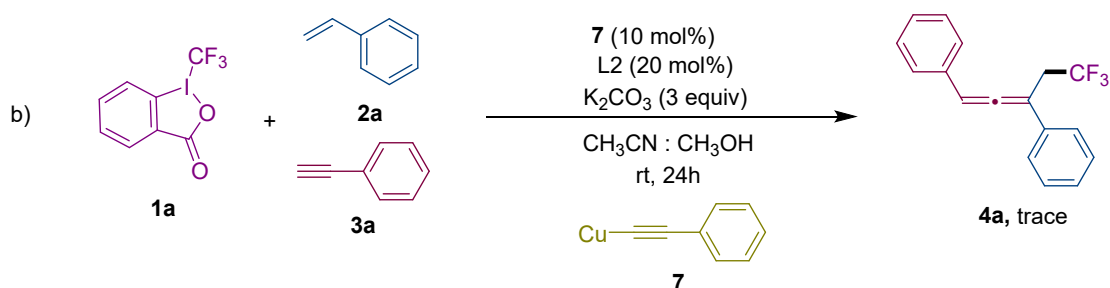

Flame-dried 10 mL Schlenk tube filled with argon, Togni's reagent II (**1a**) (0.3 mmol, 1.5 equiv), styrene (**2a**) (0.2 mmol, 1.0 equiv), phenylacetylene (**3a**) (0.3 mmol, 1.5 equiv), copper acetylide **7** (0.02 mmol, 10 mol%), 2,2':6',2''-terpyridine (0.04 mmol,

20 mol%),  $K_2CO_3$  (0.6 mmol, 3.0 equiv), absolute dry  $CH_3CN$  (0.3 mL) and absolute dry  $CH_3OH$  (0.7 mL) were added under  $N_2$ . The formed mixture was stirred at room temperature under  $N_2$  for 24 h. The reaction mixture was analyzed by GC-MS showing that trace amount of desired product **4a** was detected.

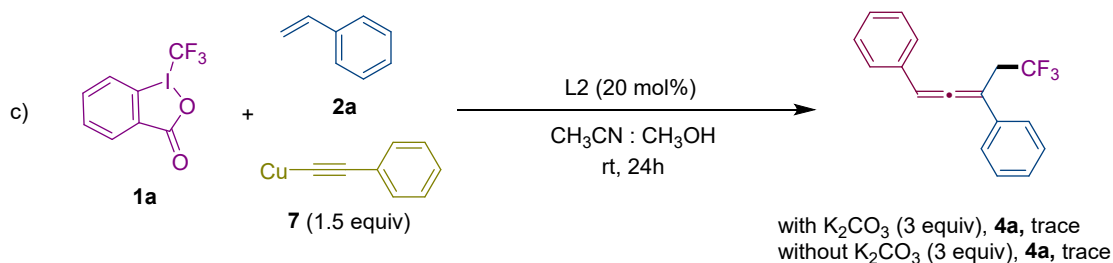

With  $K_2CO_3$ : Flame-dried 10 mL Schlenk tube filled with argon, Togni's reagent II (**1a**) (0.3 mmol, 1.5 equiv), styrene (**2a**) (0.2 mmol, 1.0 equiv), copper acetylide **7** (0.3 mmol, 1.5 equiv), 2,2':6',2''-terpyridine (0.04 mmol, 20 mol%),  $K_2CO_3$  (0.6 mmol, 3.0 equiv), absolute dry  $CH_3CN$  (0.3 mL) and absolute dry  $CH_3OH$  (0.7 mL) were added under  $N_2$ . The formed mixture was stirred at room temperature under  $N_2$  for 24 h. The reaction mixture was analyzed by GC-MS showing that trace amount of desired product **4a** was detected.

Without  $K_2CO_3$ : Flame-dried 10 mL Schlenk tube filled with argon, Togni's reagent II (**1a**) (0.3 mmol, 1.5 equiv), styrene (**2a**) (0.2 mmol, 1.0 equiv), copper acetylide **7** (0.3 mmol, 1.5 equiv), 2,2':6',2''-terpyridine (0.04 mmol, 20 mol%), absolute dry  $CH_3CN$  (0.3 mL) and absolute dry  $CH_3OH$  (0.7 mL) were added under  $N_2$ . The formed mixture was stirred at room temperature under  $N_2$  for 24 h. The reaction mixture was analyzed by GC-MS showing that trace amount of desired product **4a** was detected.

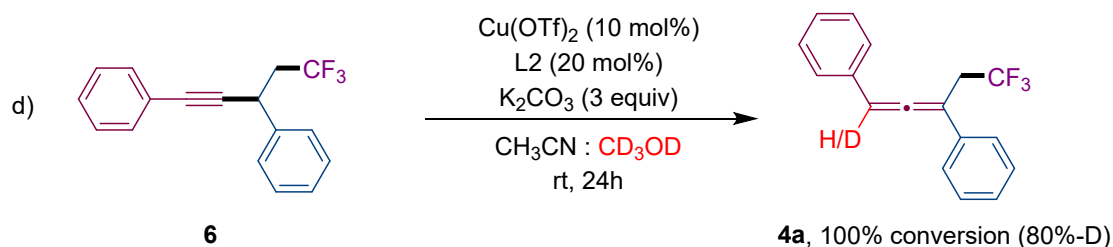

Flame-dried 10 mL Schlenk tube filled with argon,  $\beta$ -CF<sub>3</sub> alkyne **6** (0.2 mmol, 1.0 equiv), Cu(OTf)<sub>2</sub> (0.02 mmol, 10 mol%), 2,2':6',2''-terpyridine (0.04 mmol, 20 mol%), K<sub>2</sub>CO<sub>3</sub> (0.6 mmol, 3.0 equiv), absolute dry CH<sub>3</sub>CN (0.3 mL) and absolute dry CD<sub>3</sub>OD (0.7 mL) were added under N<sub>2</sub>. The formed mixture was stirred at room temperature under N<sub>2</sub> for 24 h. The reaction mixture was analyzed by <sup>1</sup>H NMR showing that 78% deuterated **D-4a** was obtained with 100% conversion.

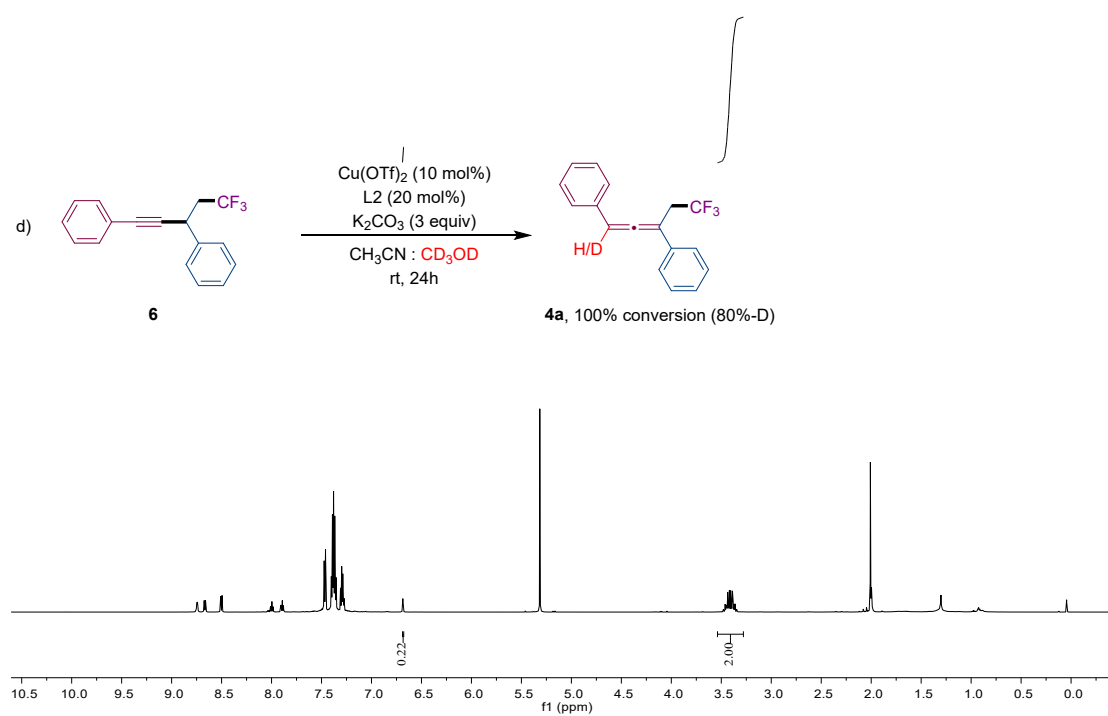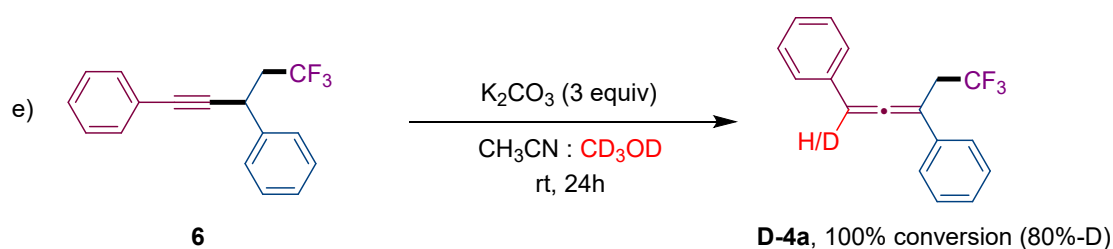

Flame-dried 10 mL Schlenk tube filled with argon,  $\beta$ -CF<sub>3</sub> alkyne **6** (0.2 mmol, 1.0 equiv), K<sub>2</sub>CO<sub>3</sub> (0.6 mmol, 3.0 equiv), absolute dry CH<sub>3</sub>CN (0.3 mL) and absolute dry CD<sub>3</sub>OD (0.7 mL) were added under N<sub>2</sub>. The formed mixture was stirred at room temperature under N<sub>2</sub> for 24 h. The reaction mixture was analyzed by <sup>1</sup>H NMR showing that 79% deuterated **D-4a** was obtained with 100% conversion.

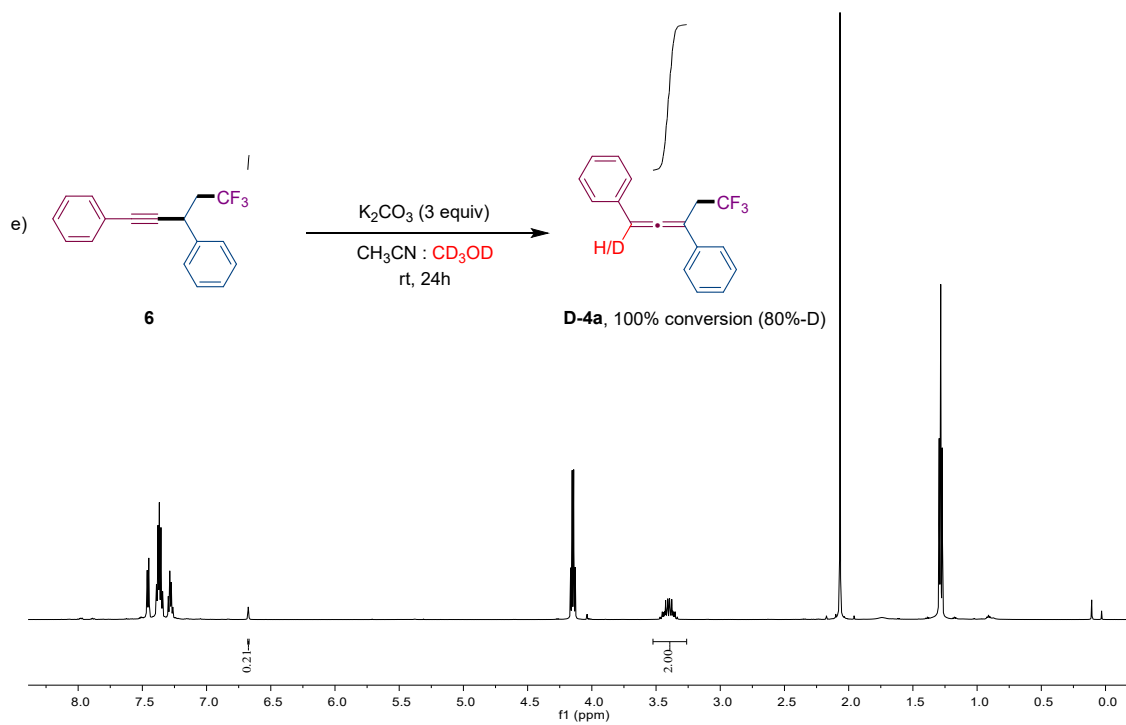

## 5. Copies of NMR Spectra

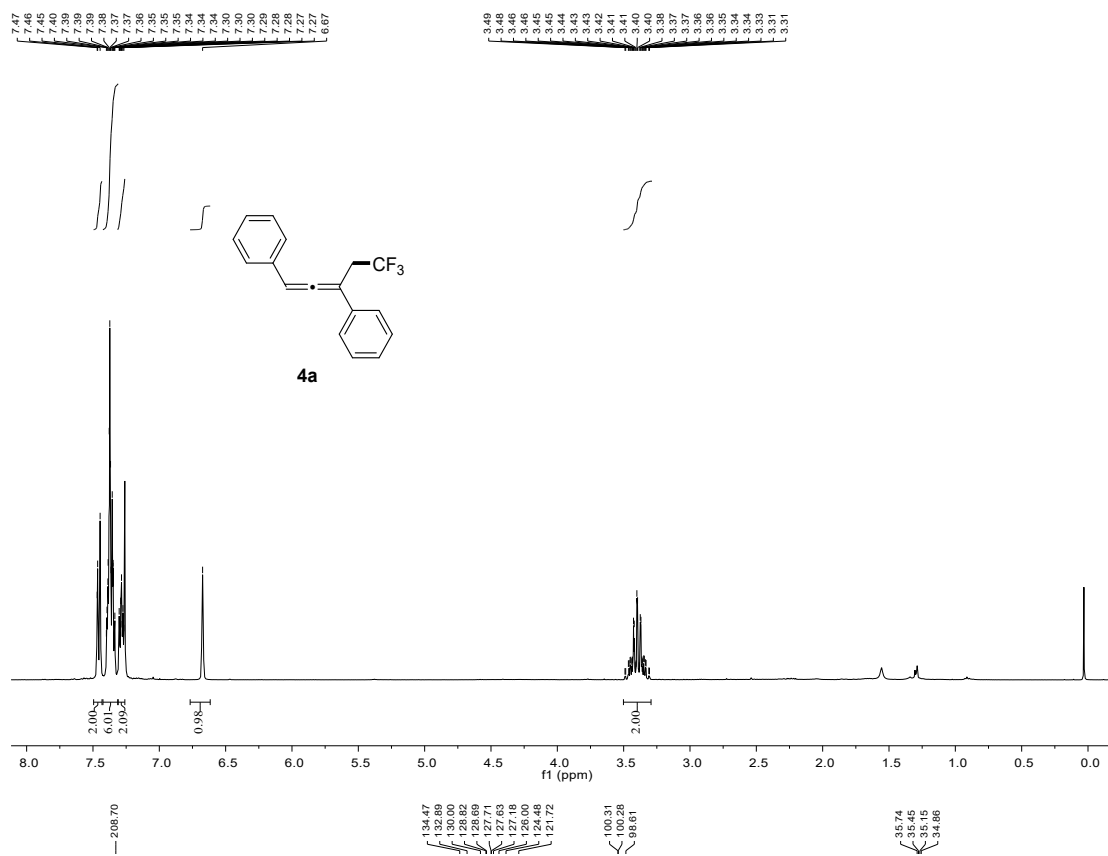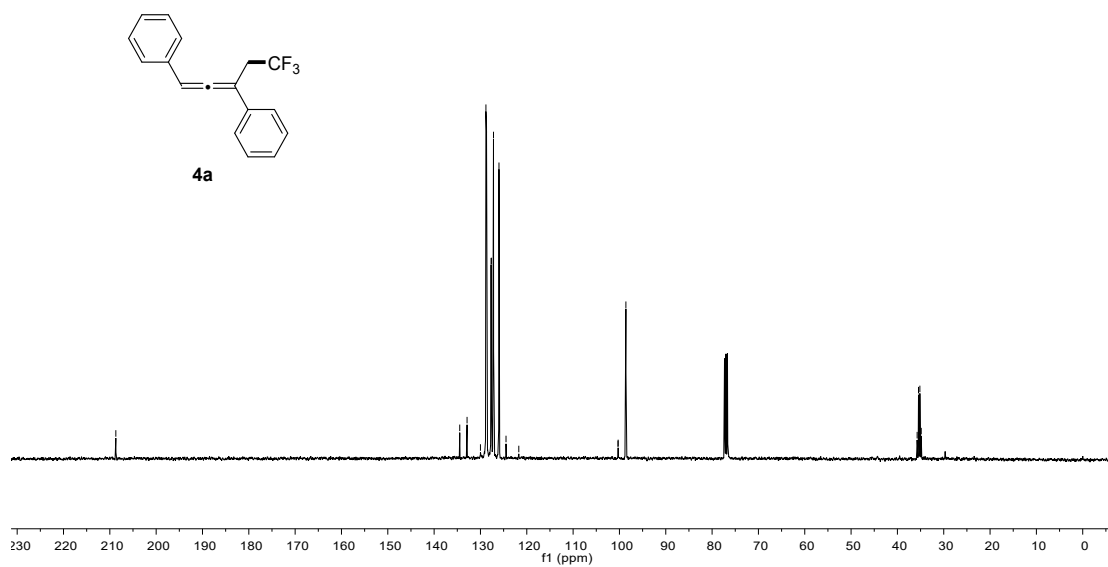

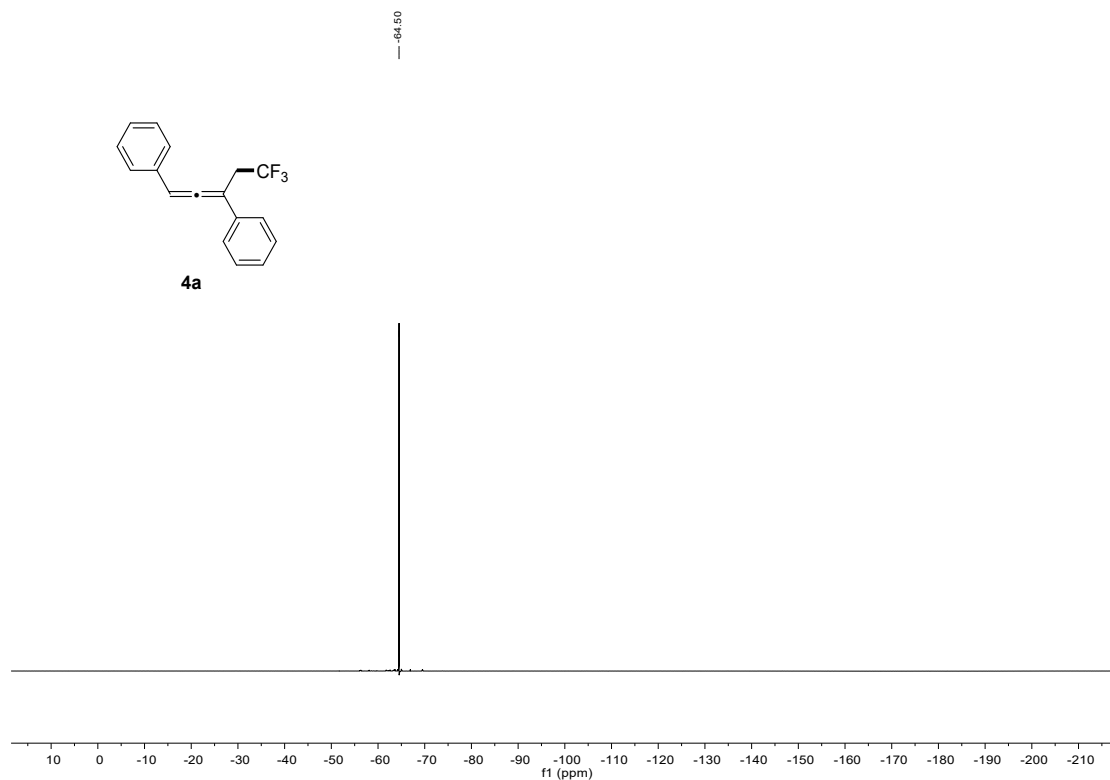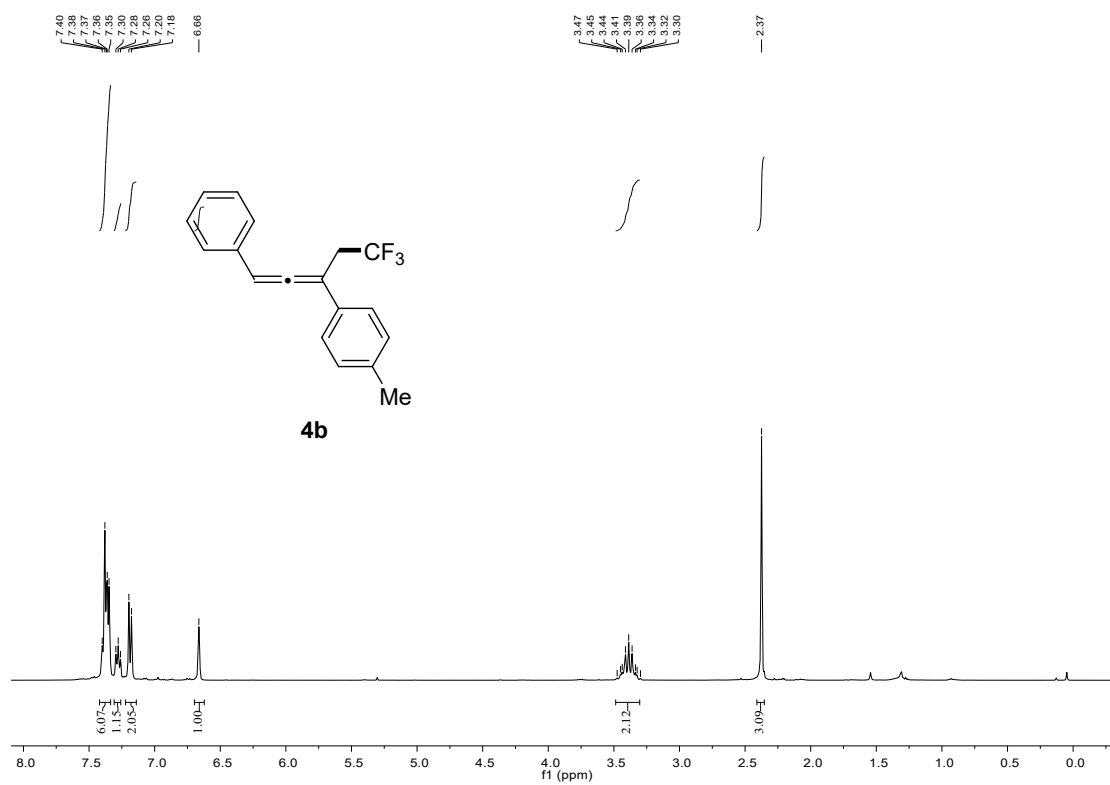

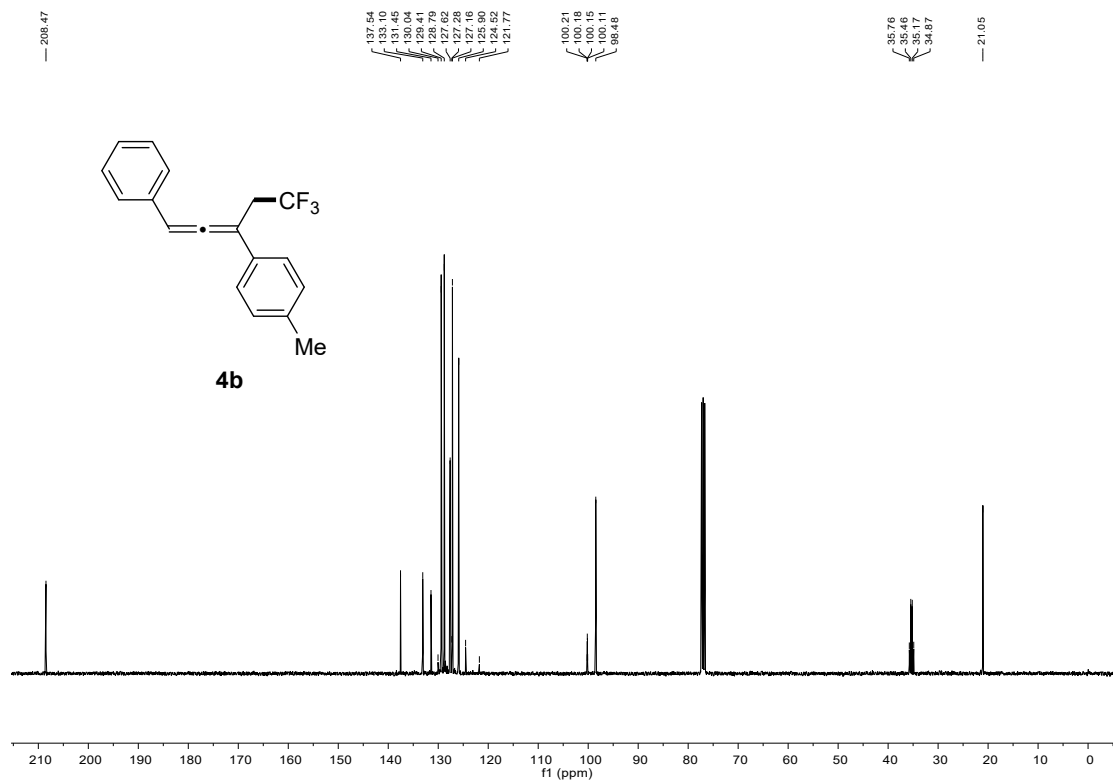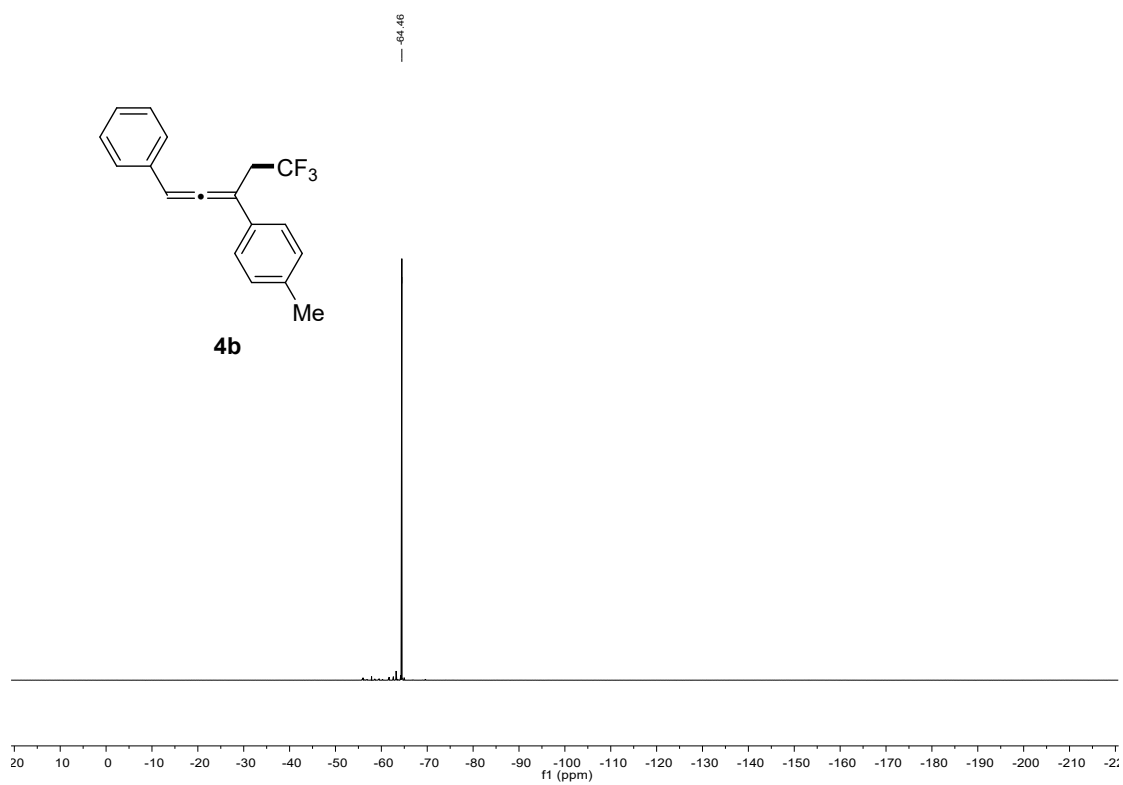



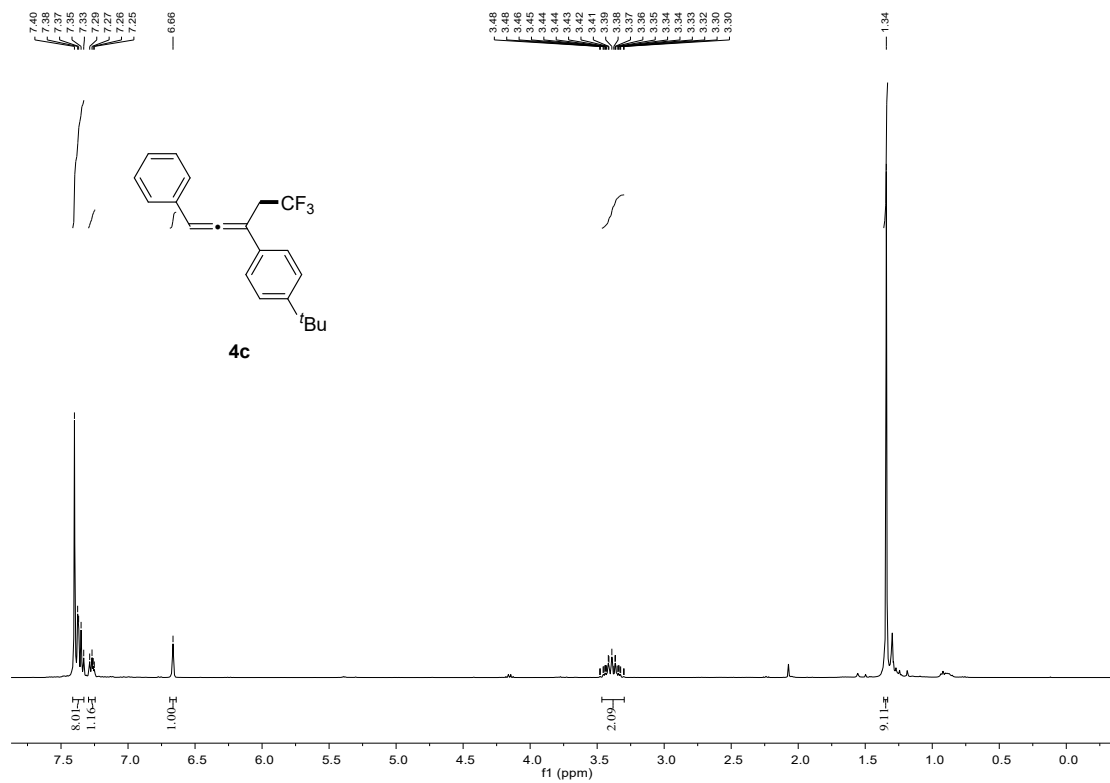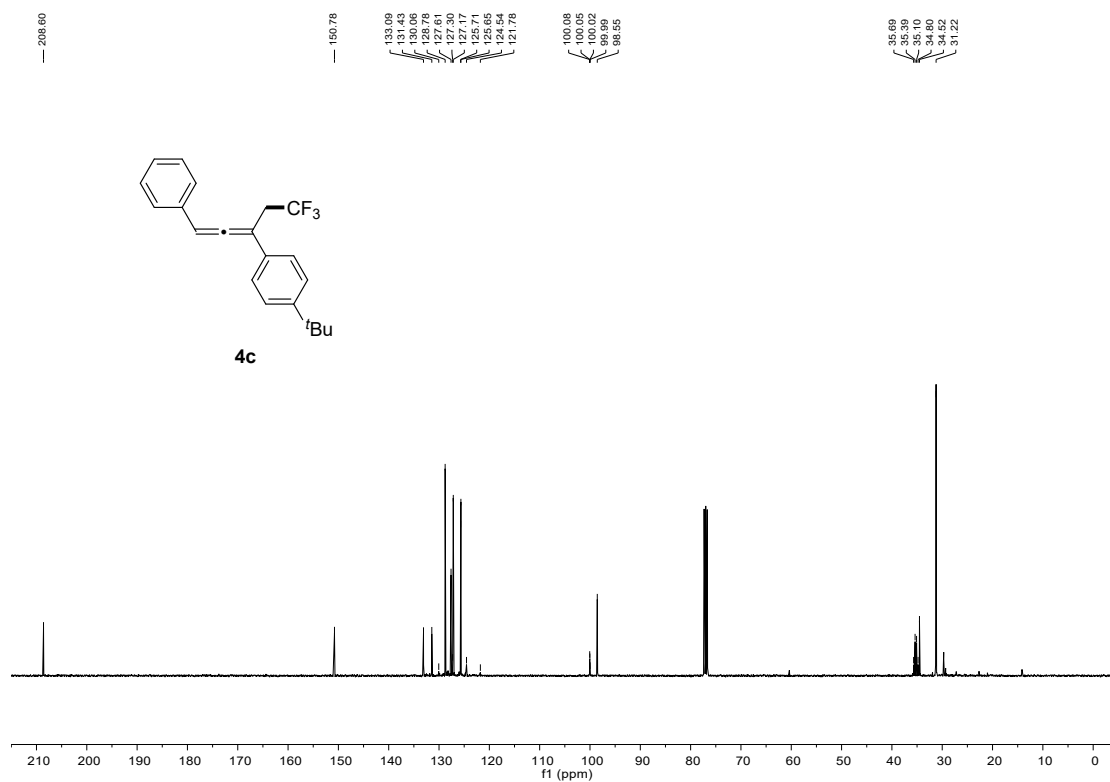

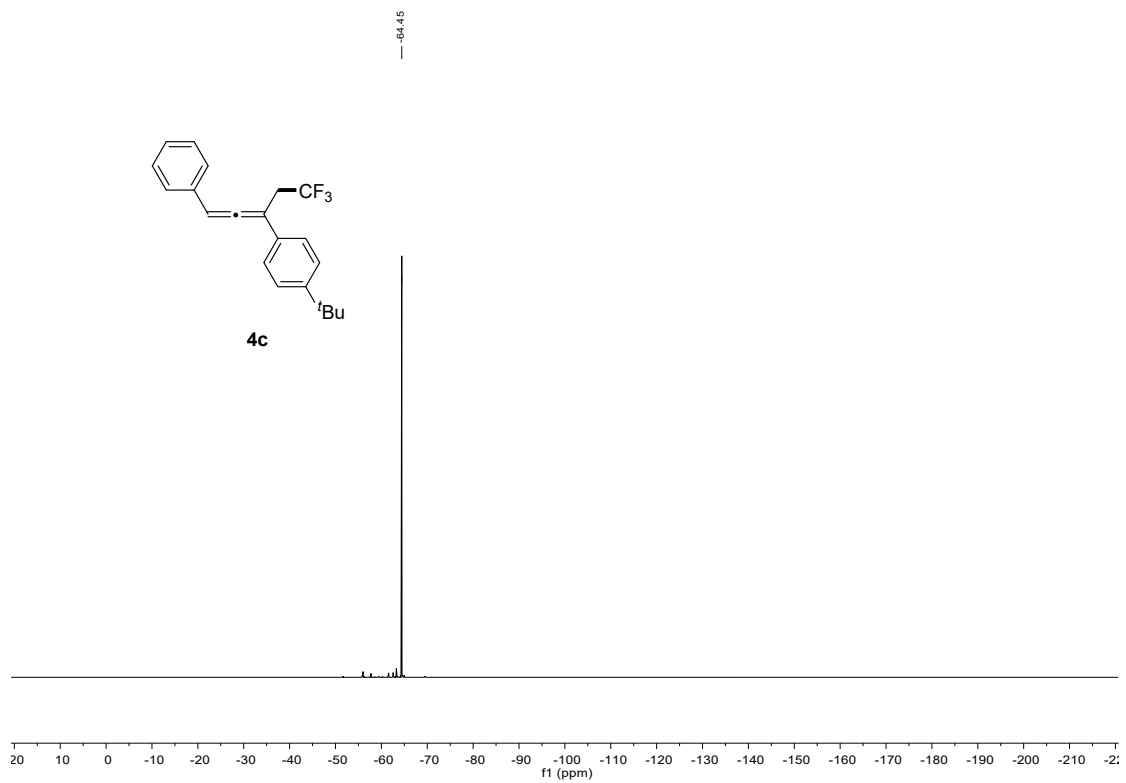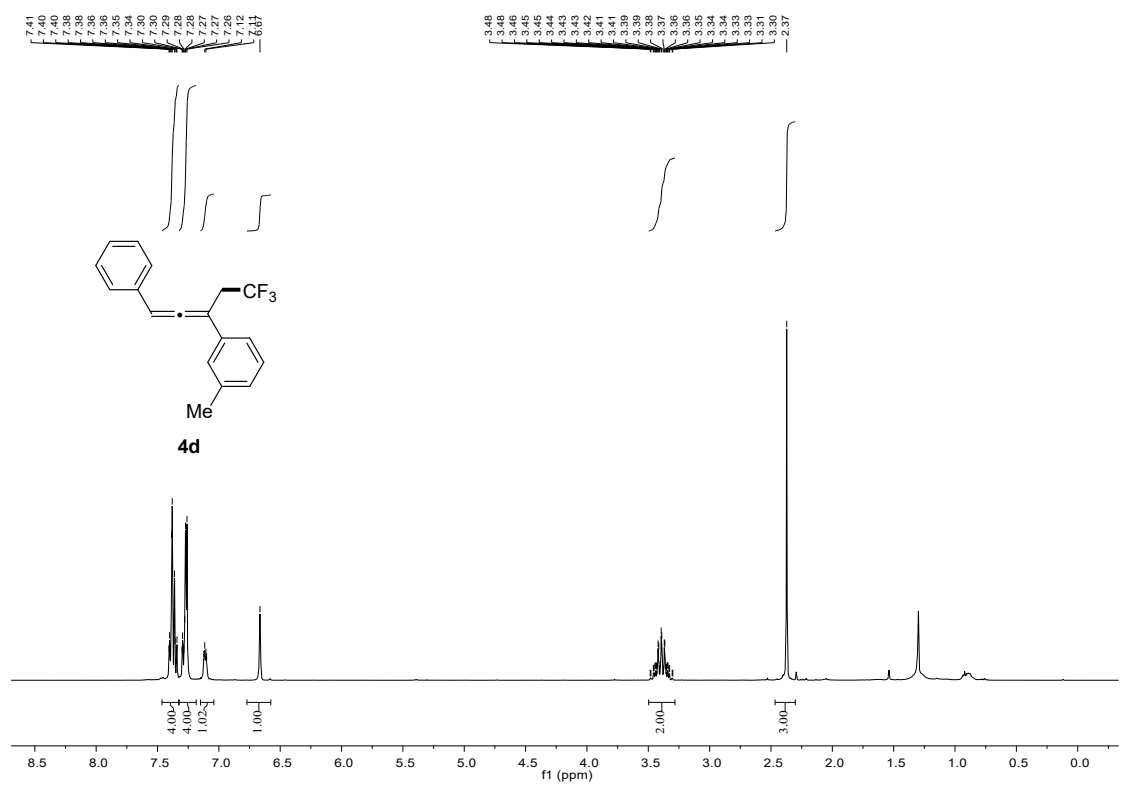

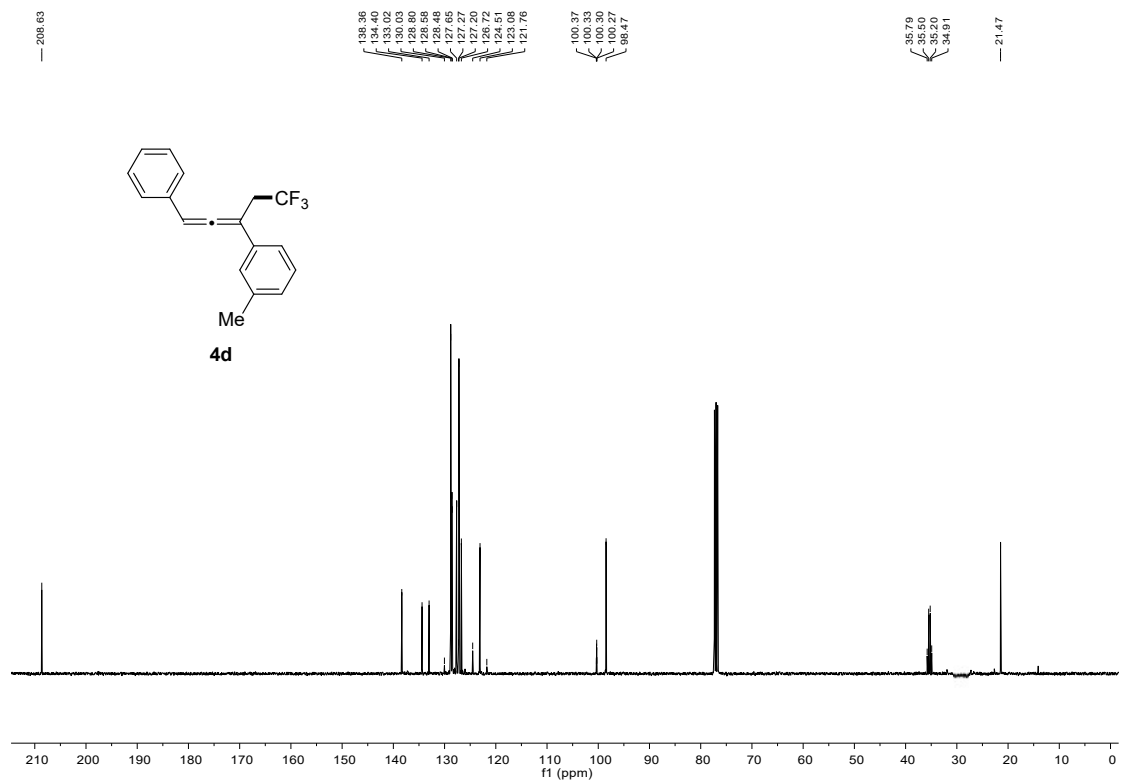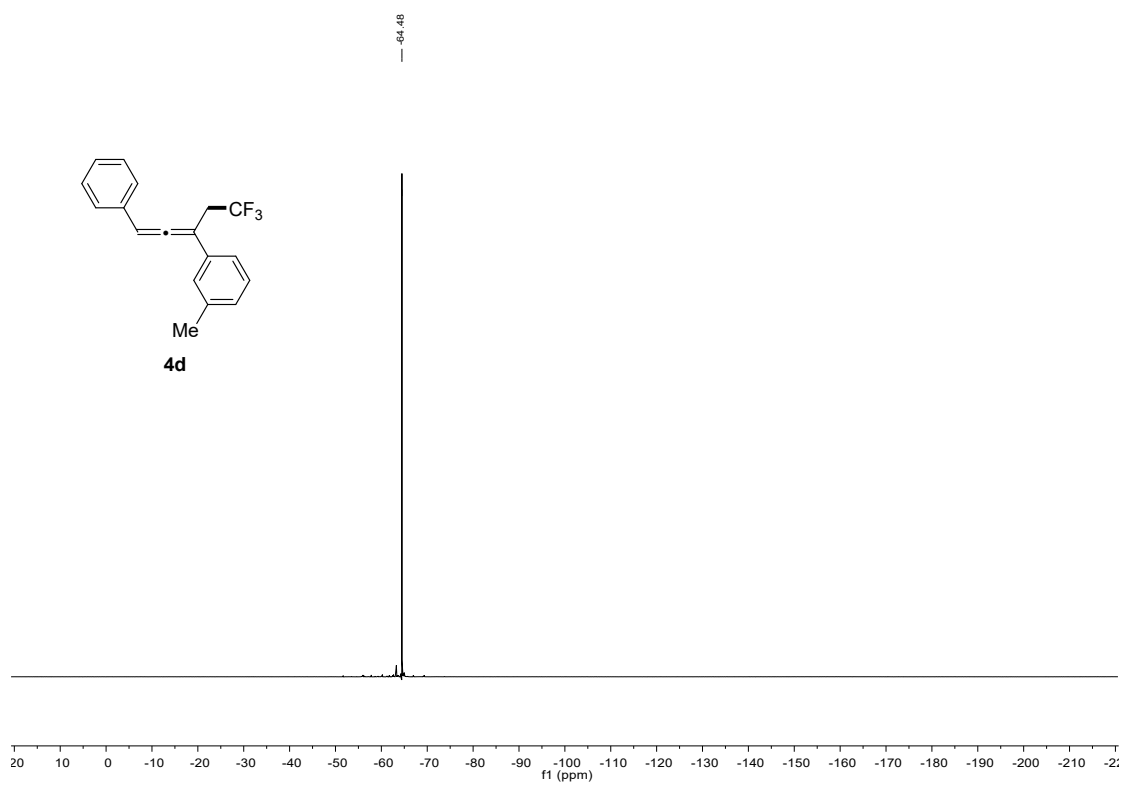

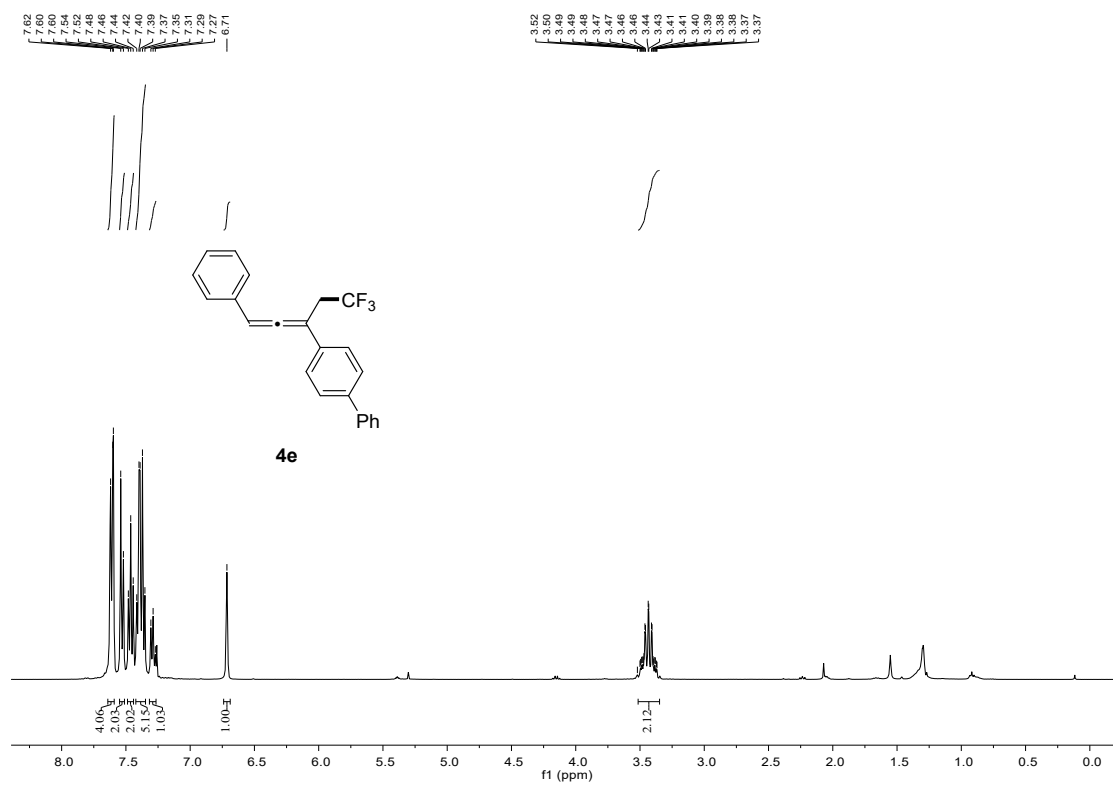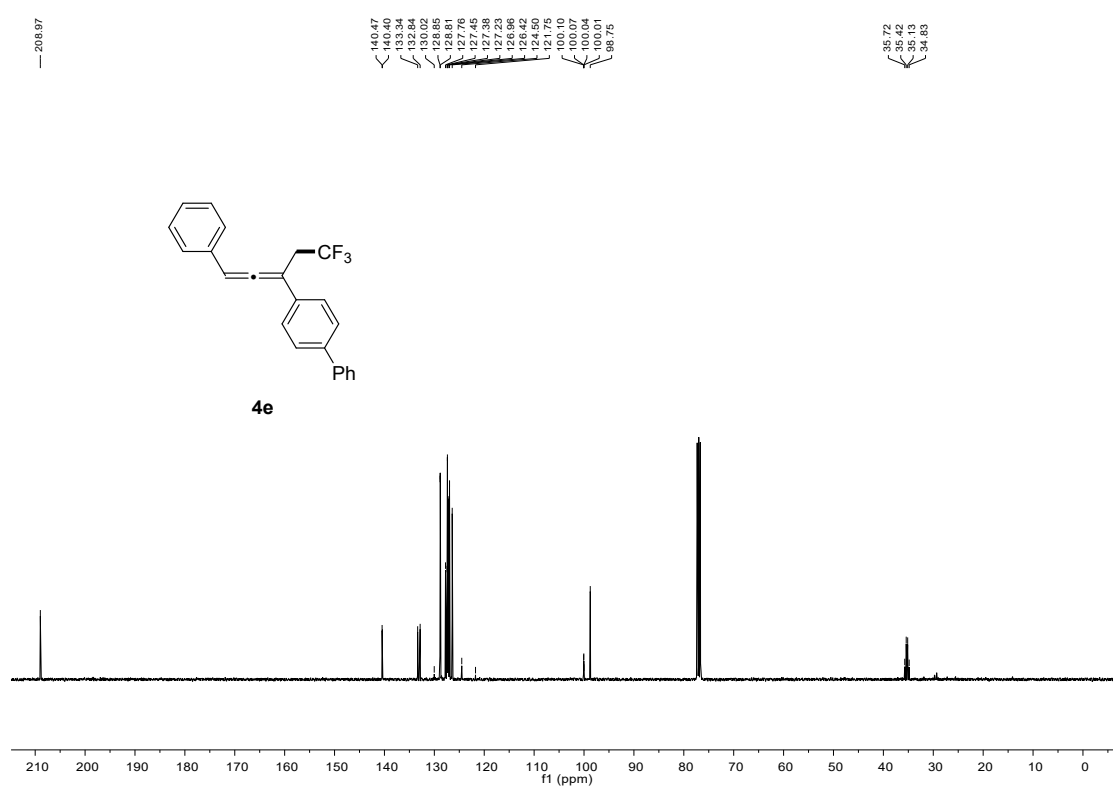

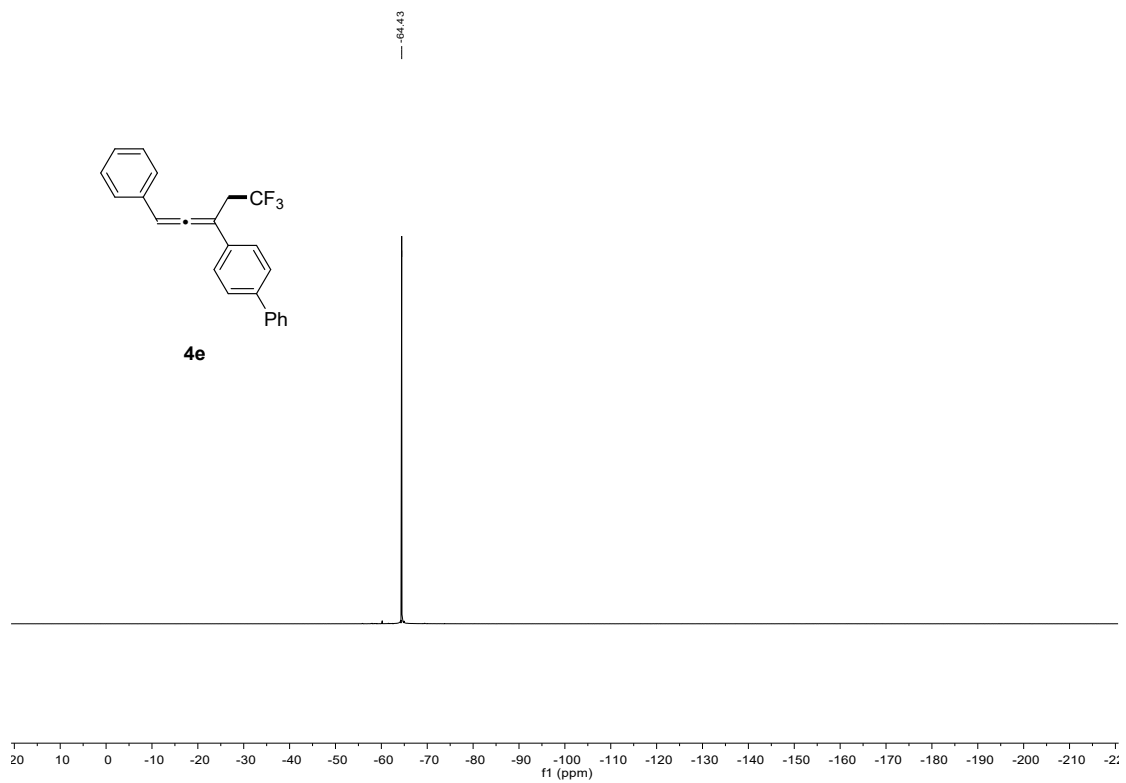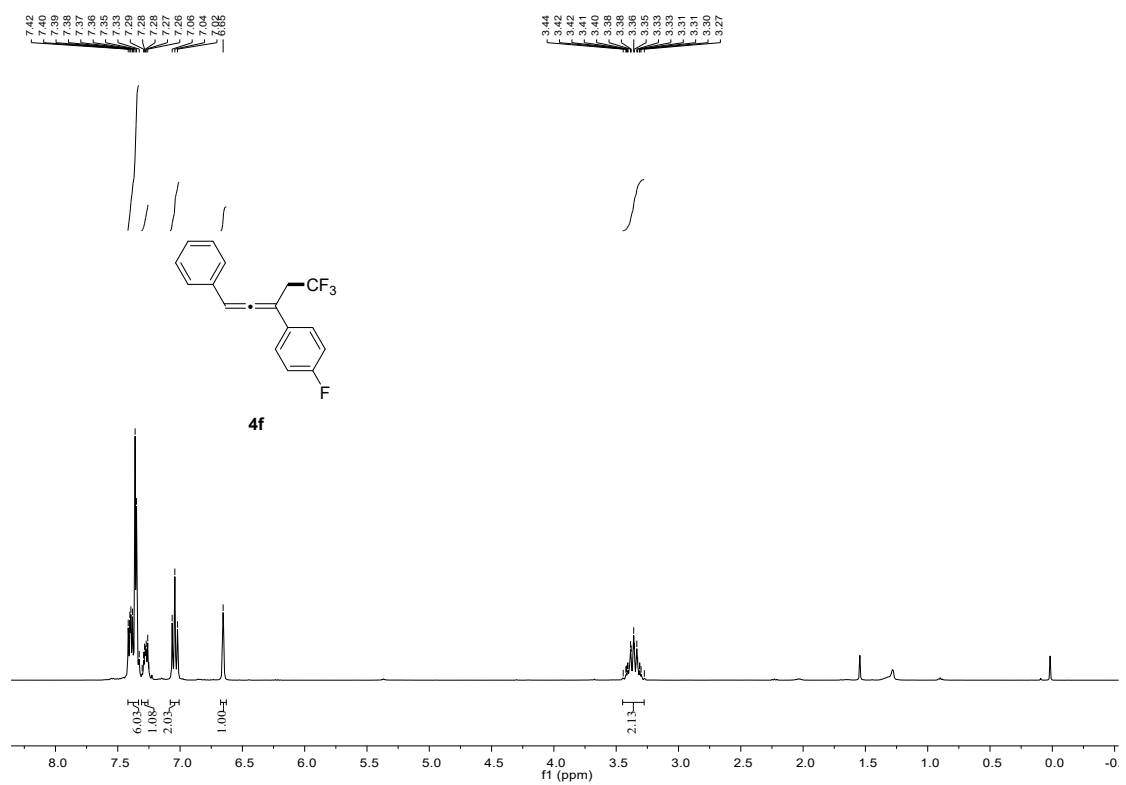

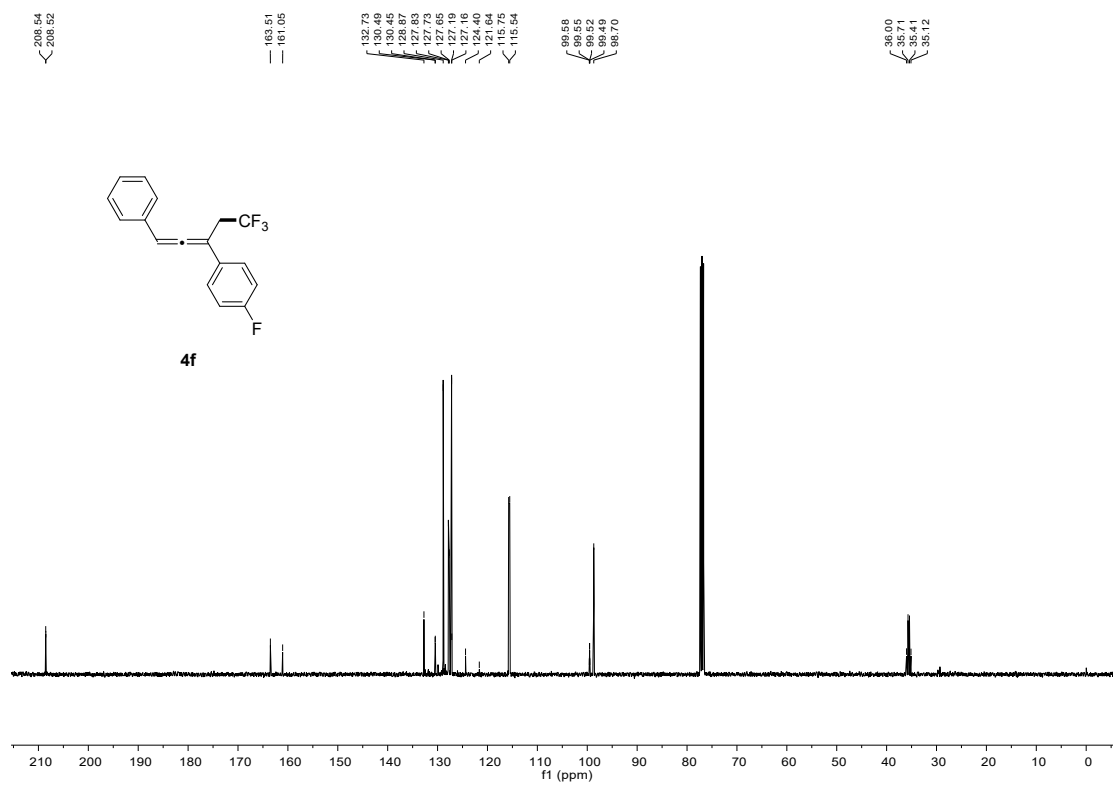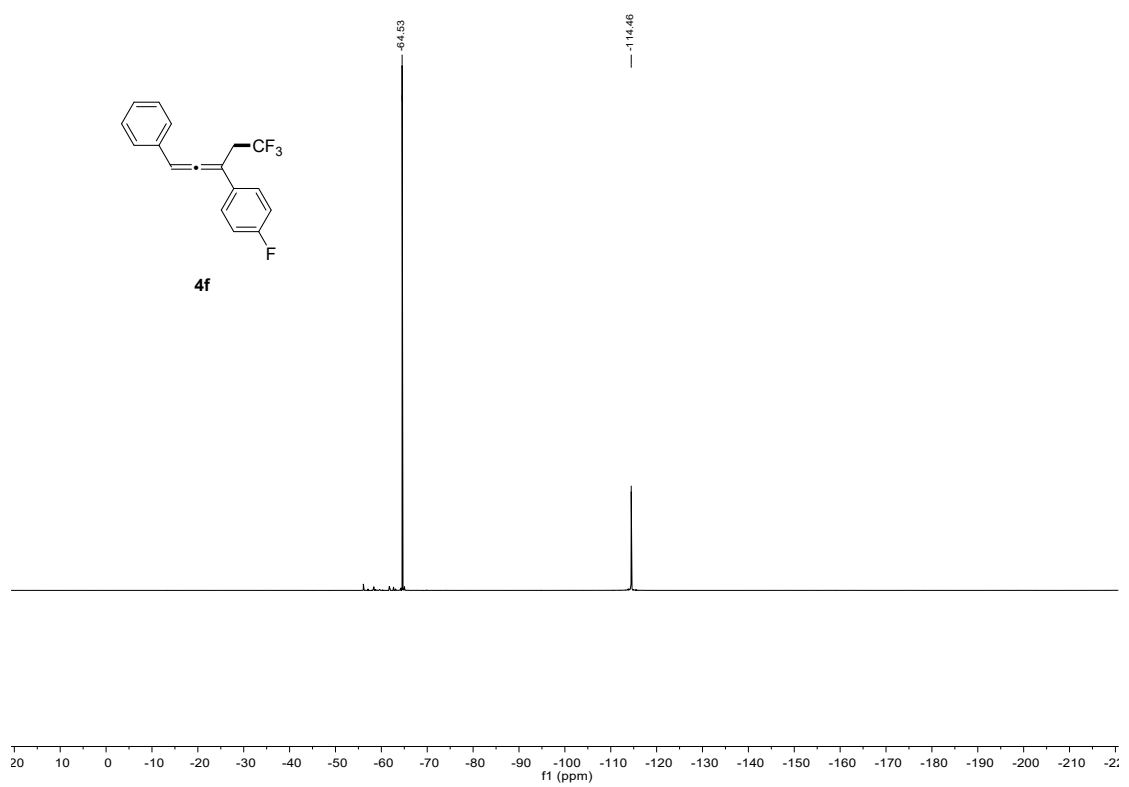

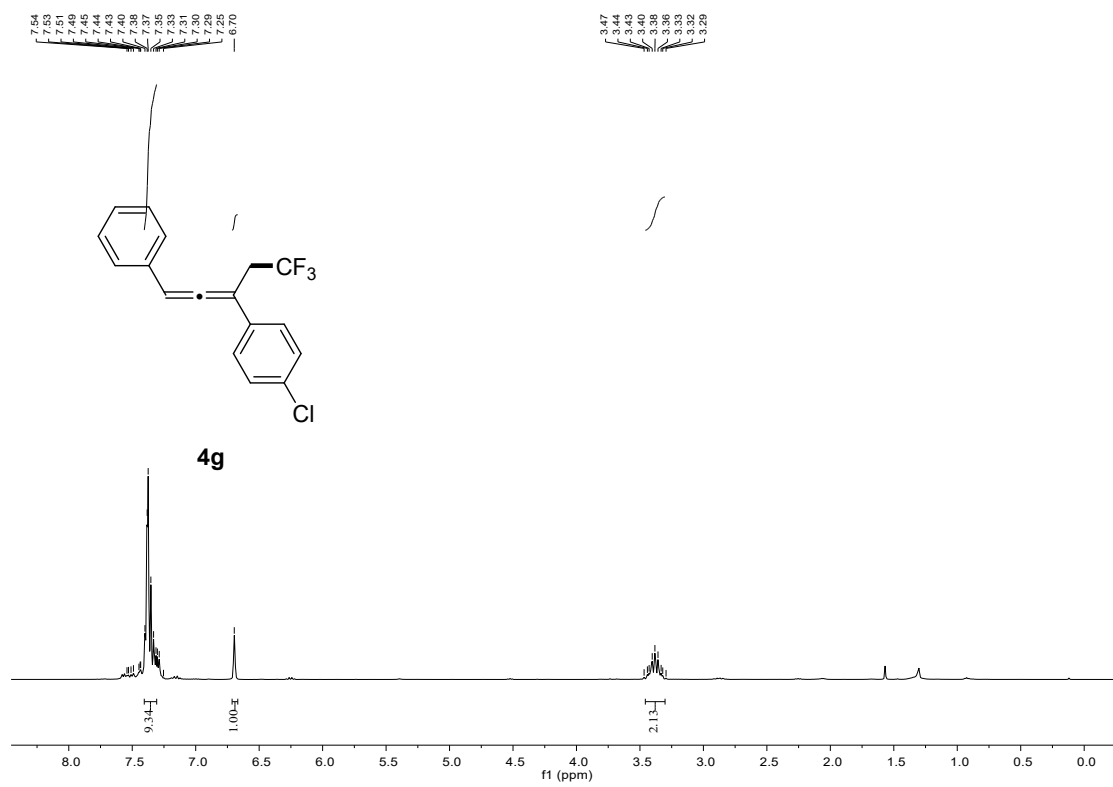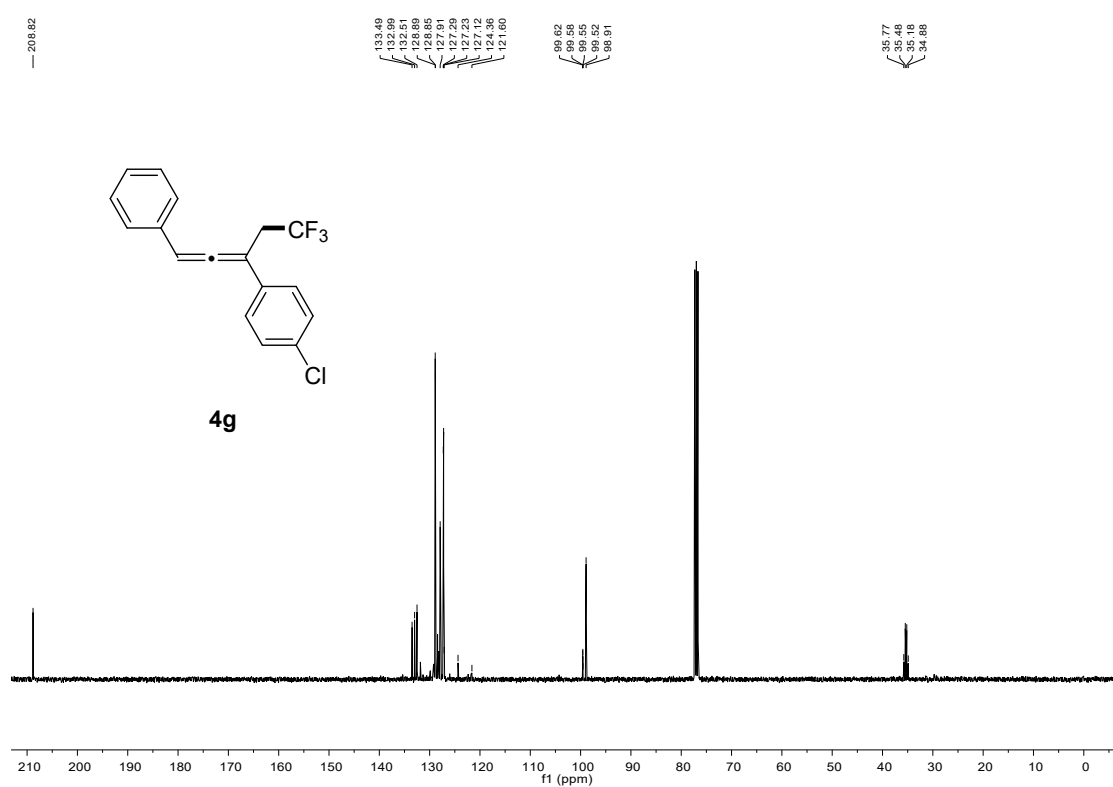

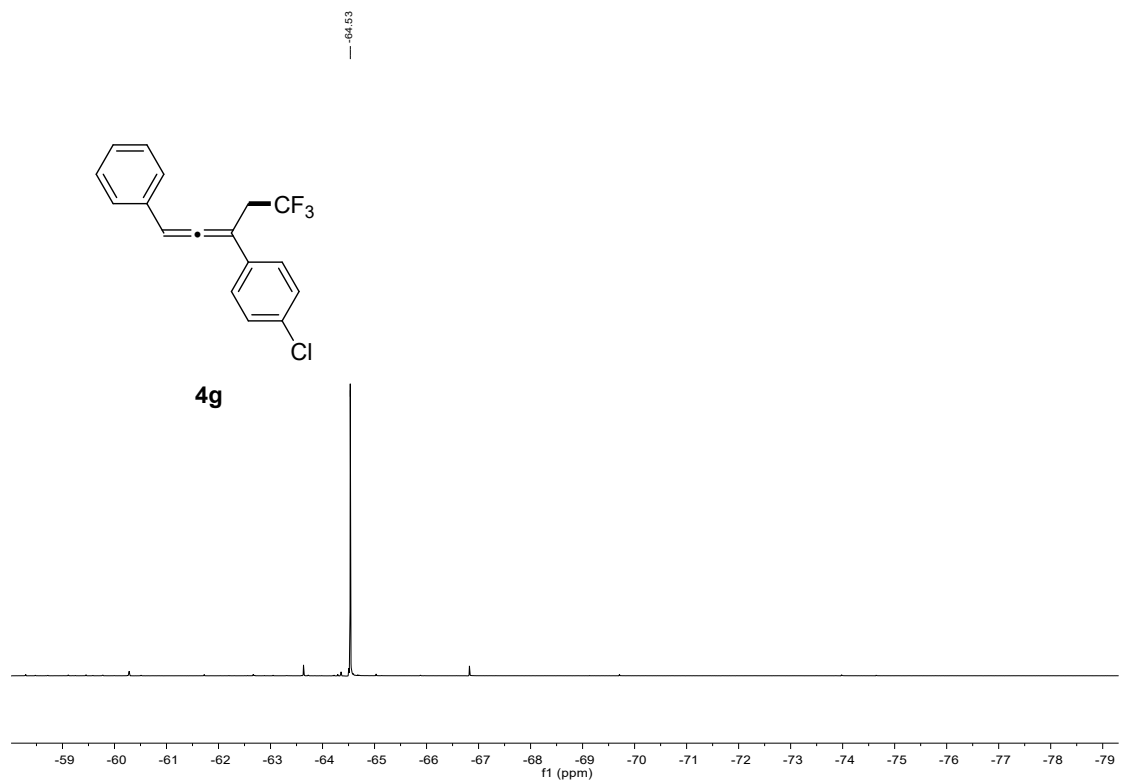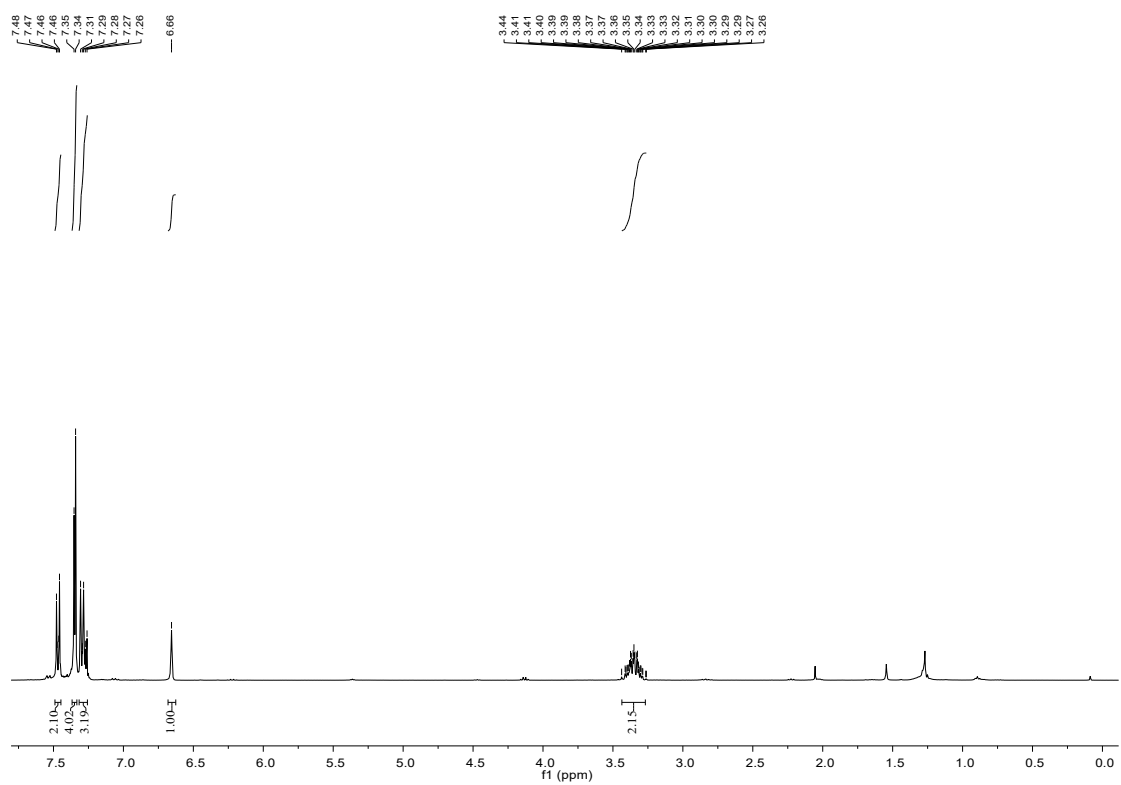



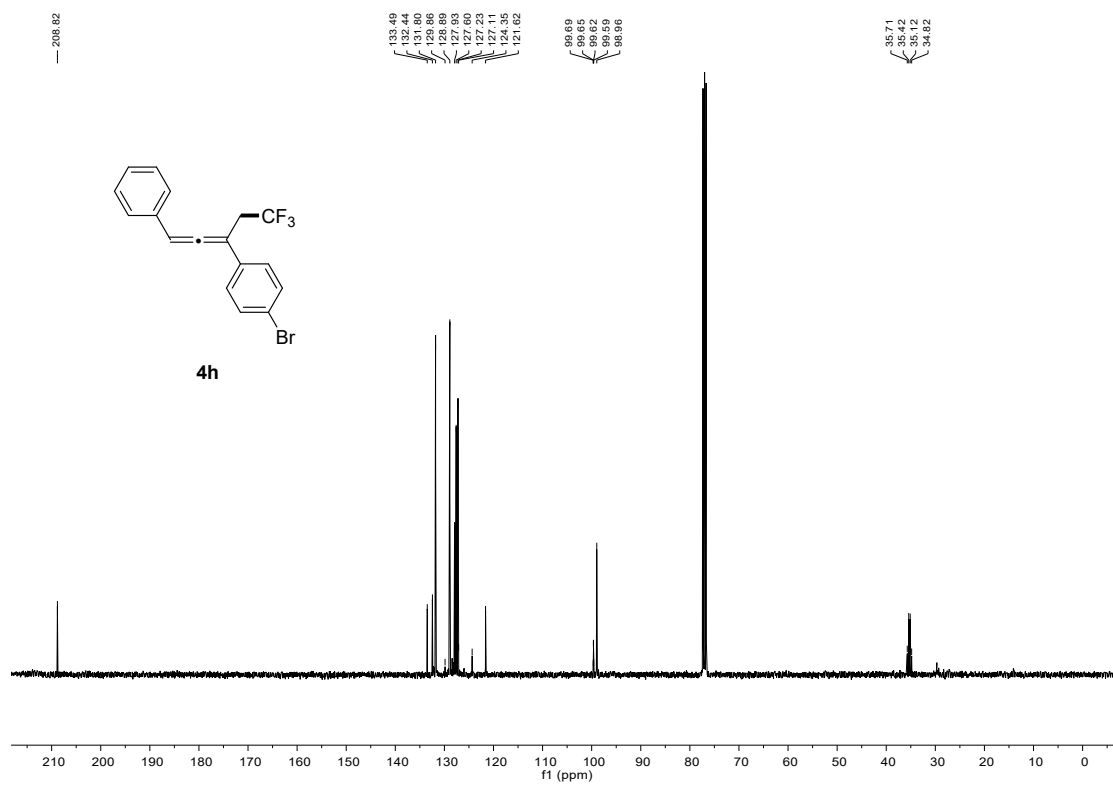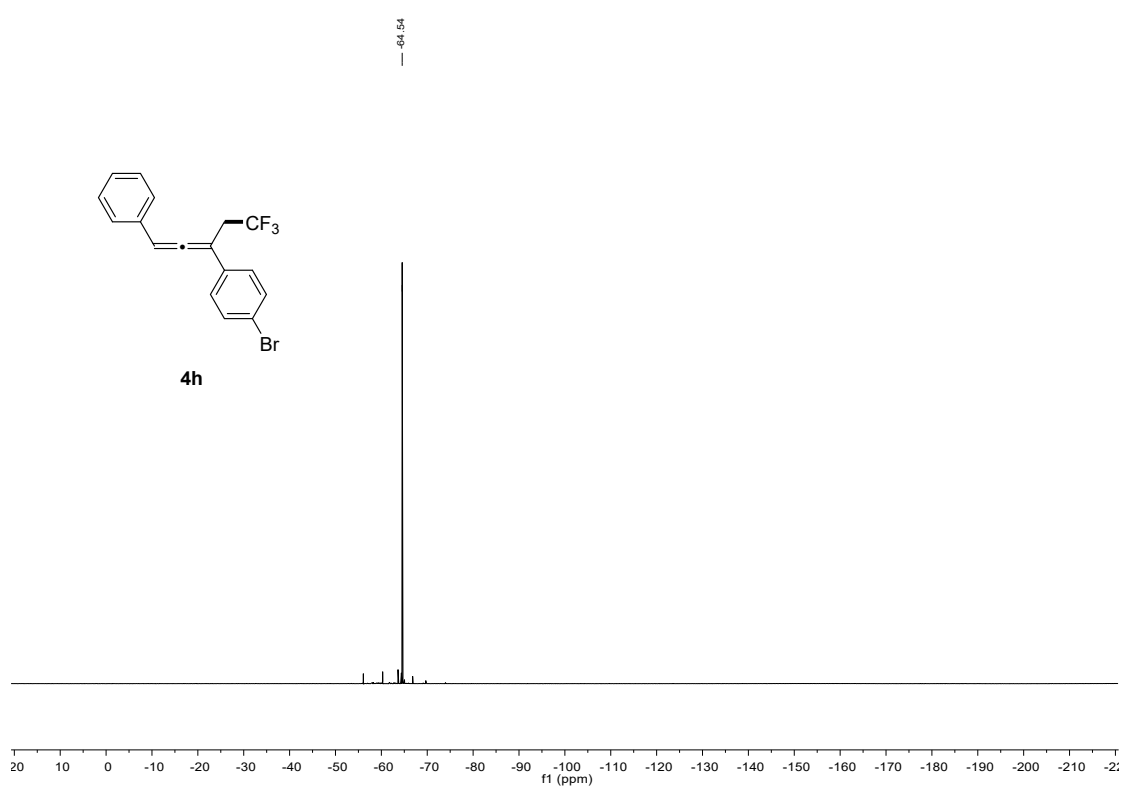

7.86  
7.86  
7.83  
7.81  
7.81  
7.79  
7.77  
7.62  
7.60  
7.53  
7.52  
7.51  
7.50  
7.49  
7.49  
7.48  
7.48  
7.46  
7.46  
7.43  
7.43  
7.41  
7.39  
7.38  
7.37  
7.31  
7.31  
7.30  
7.29  
7.29  
7.28  
7.27  
7.27  
6.75  
3.61  
3.59  
3.59  
3.58  
3.57  
3.56  
3.56  
3.55  
3.55  
3.54  
3.53  
3.53  
3.52  
3.51  
3.50  
3.49  
3.49  
3.48  
3.48  
3.47  
3.47  
3.46  
3.45

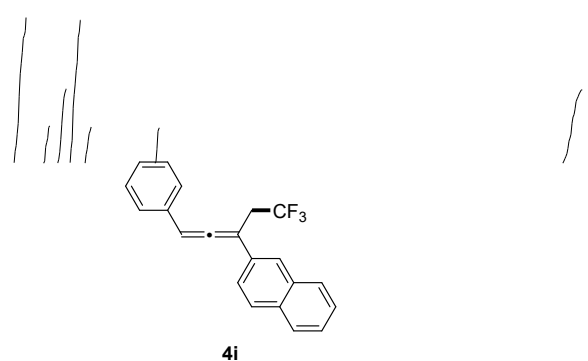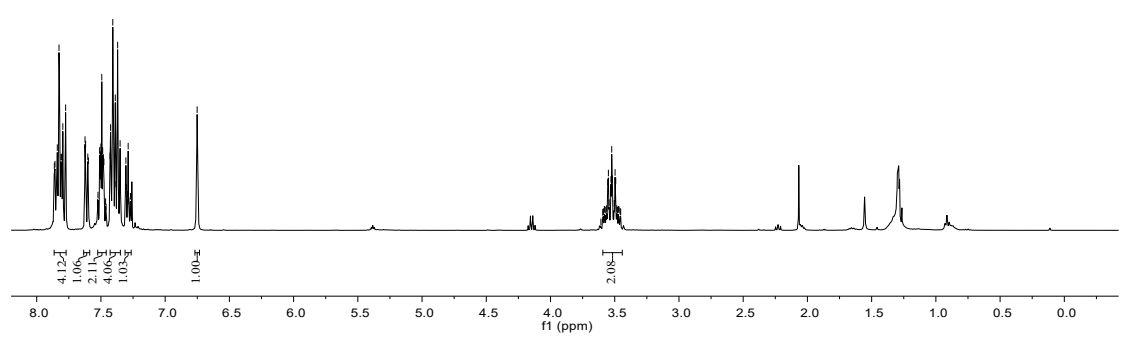

208.34  
133.45  
132.86  
132.72  
132.65  
128.86  
128.32  
128.10  
127.78  
127.31  
127.26  
126.43  
126.33  
124.73  
124.55  
124.06  
100.59  
100.55  
100.49  
88.86  
35.73  
35.44  
34.84

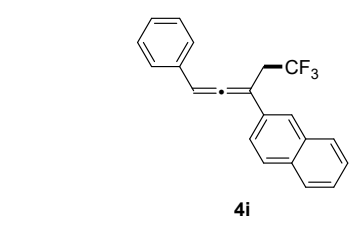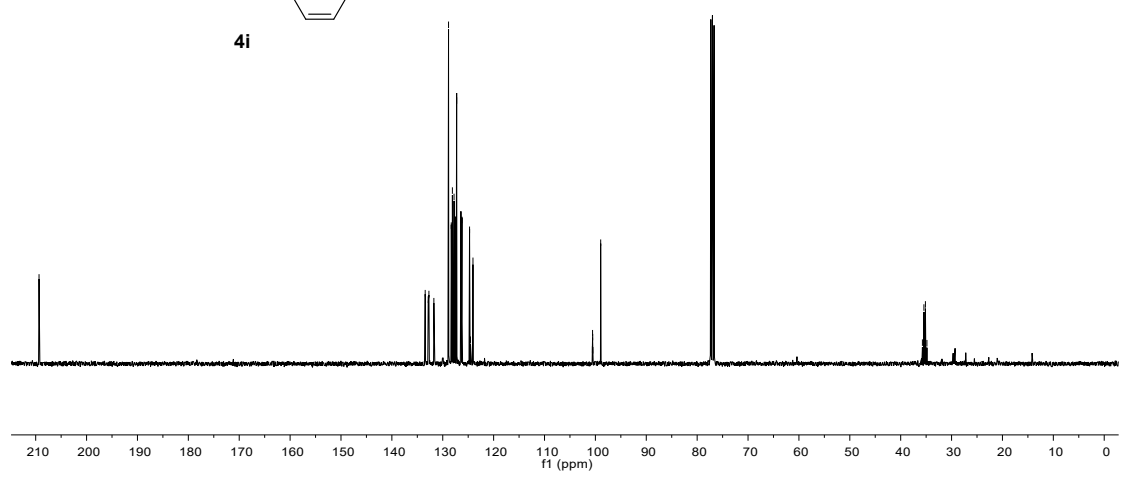

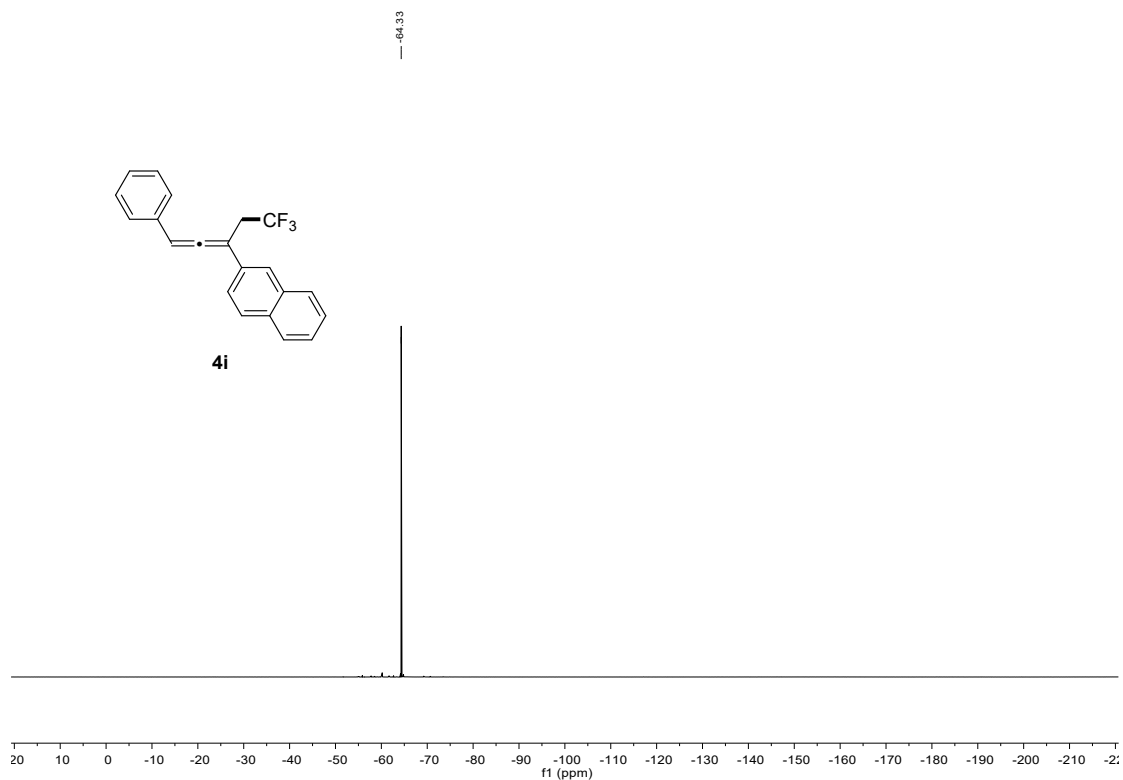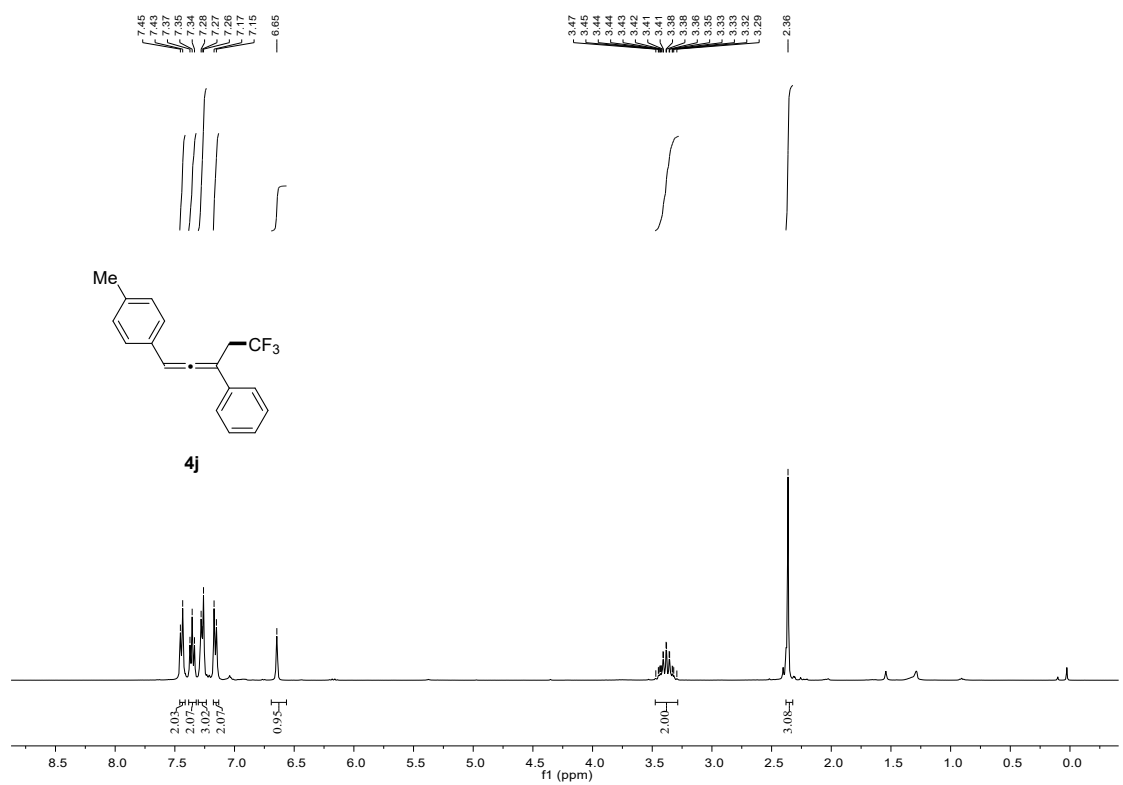

— 208.56

137.64  
134.67  
132.38  
129.86  
128.86  
127.54  
127.28  
126.99  
124.52

100.15  
100.12  
100.06  
98.43

35.76  
34.66  
34.87

— 21.22

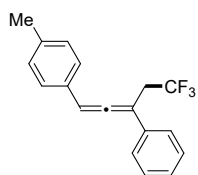

4j

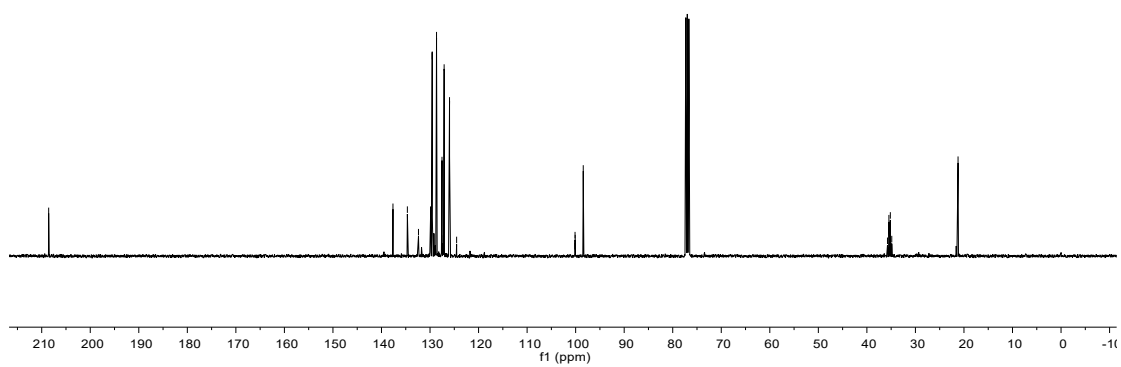

— 64.51

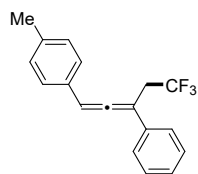

4j

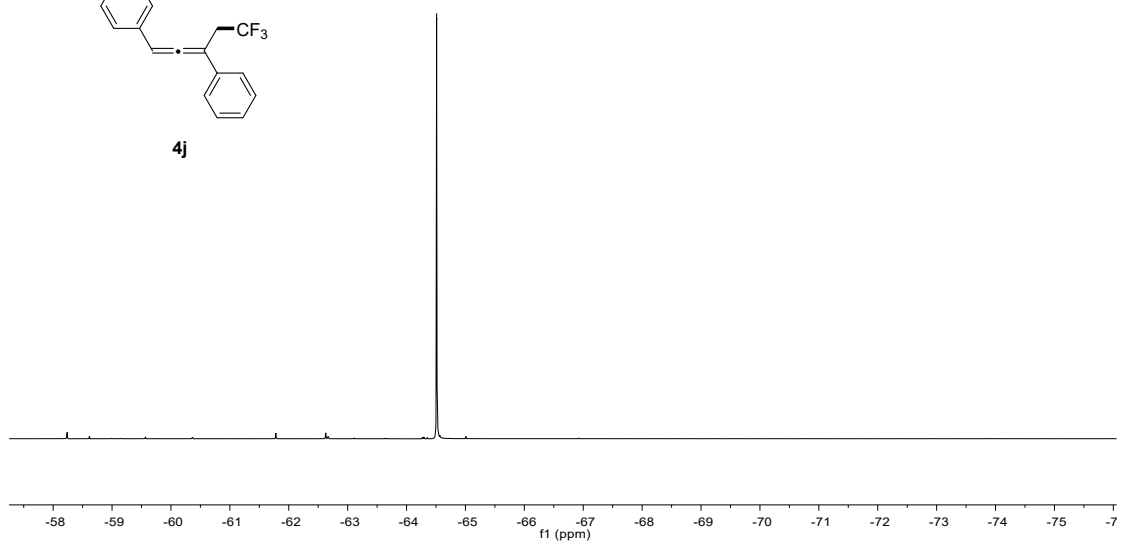

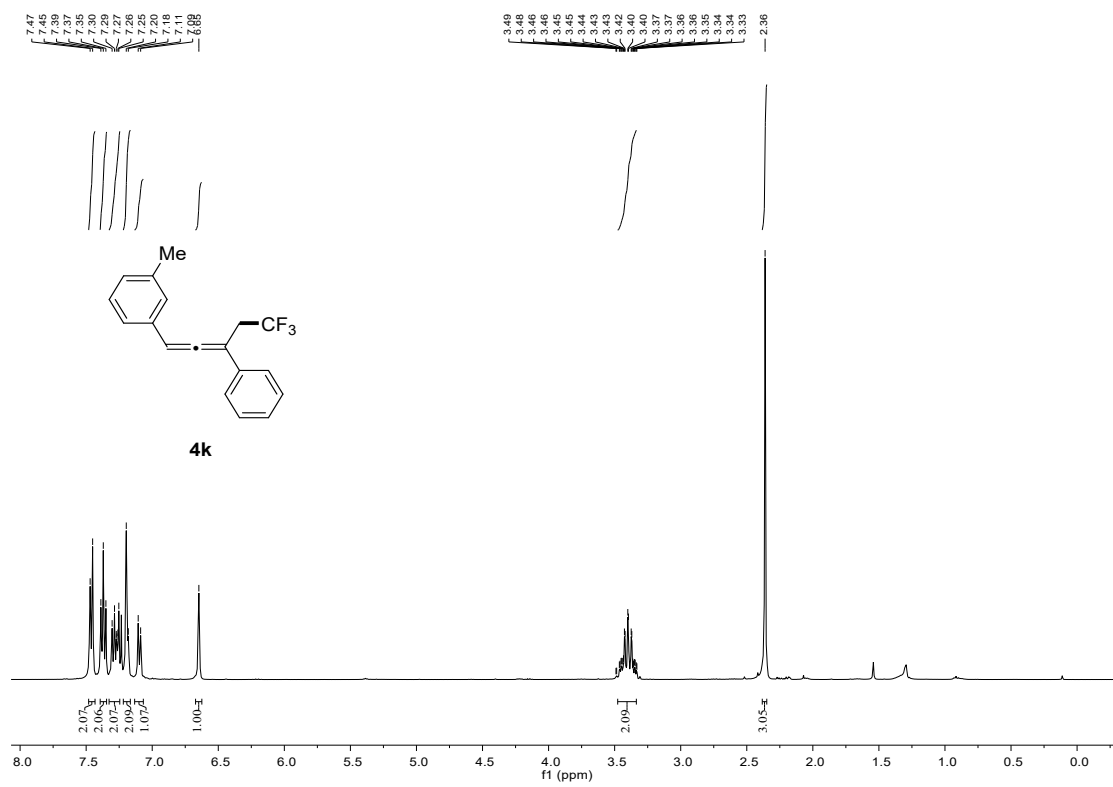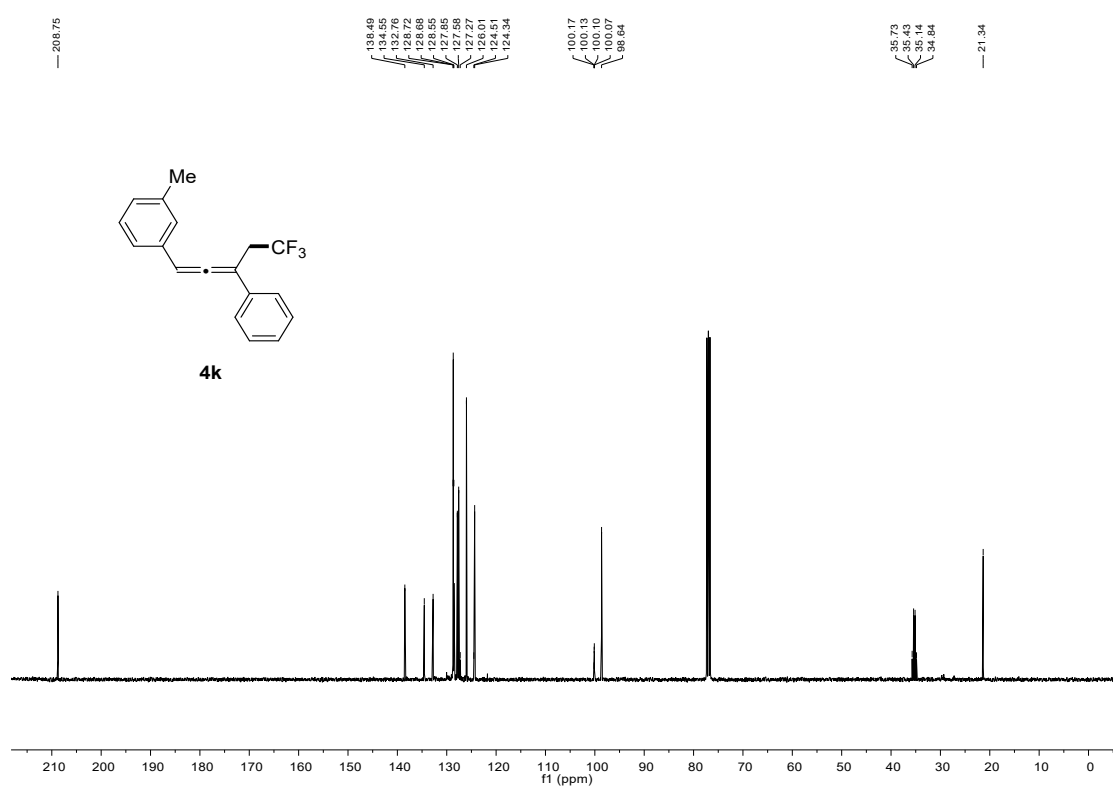

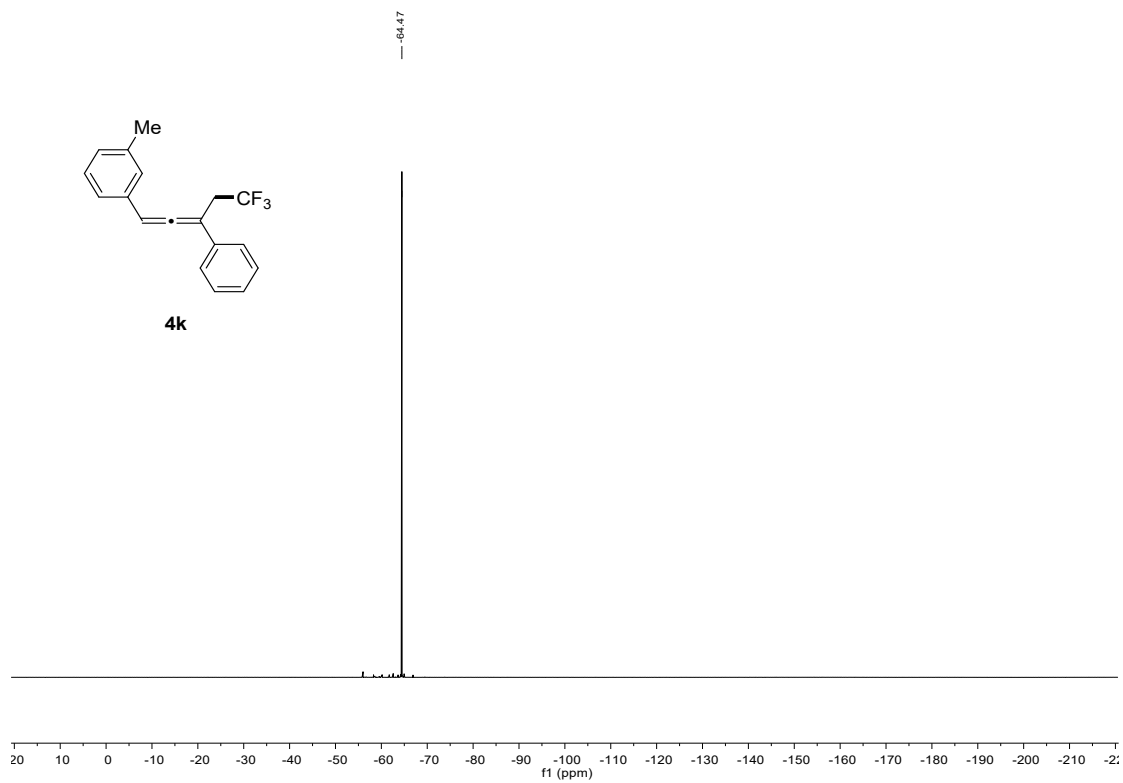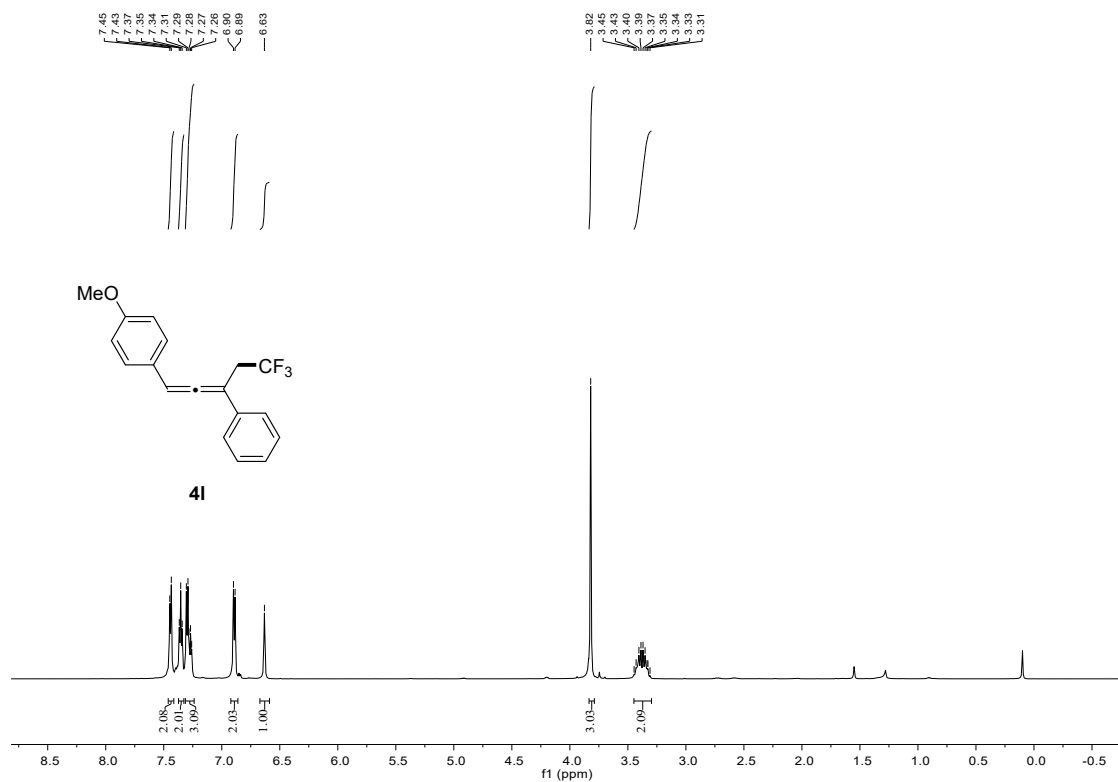

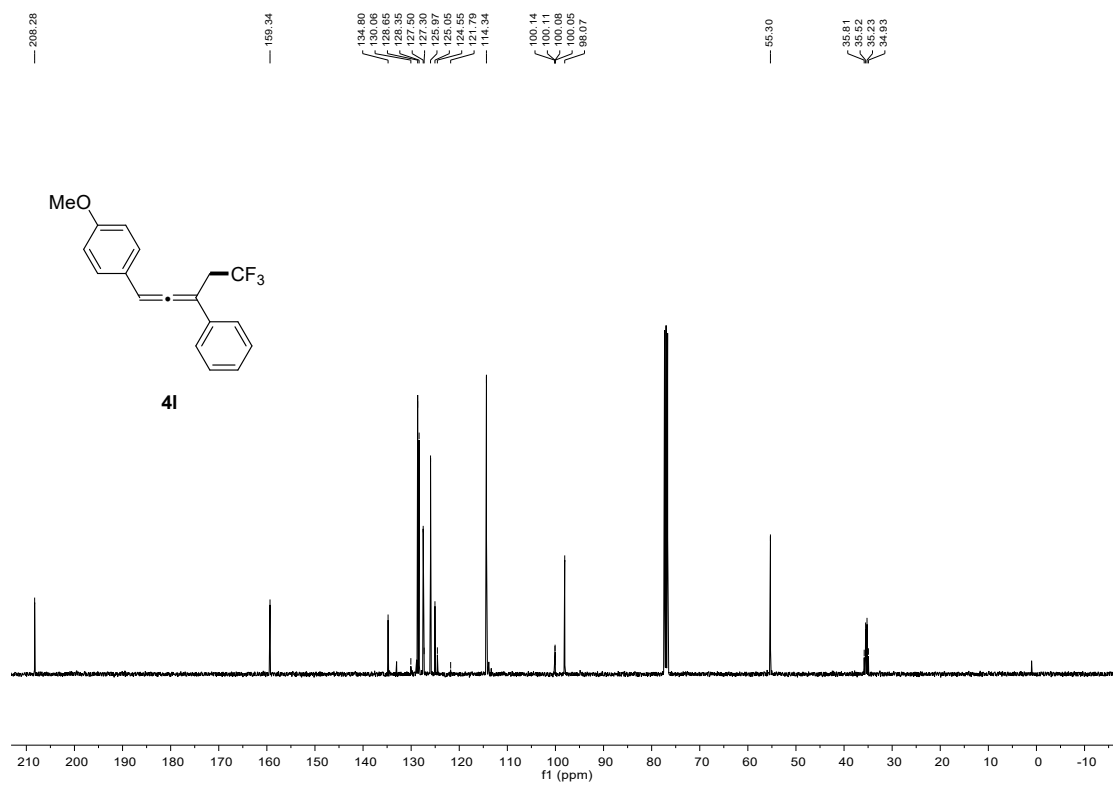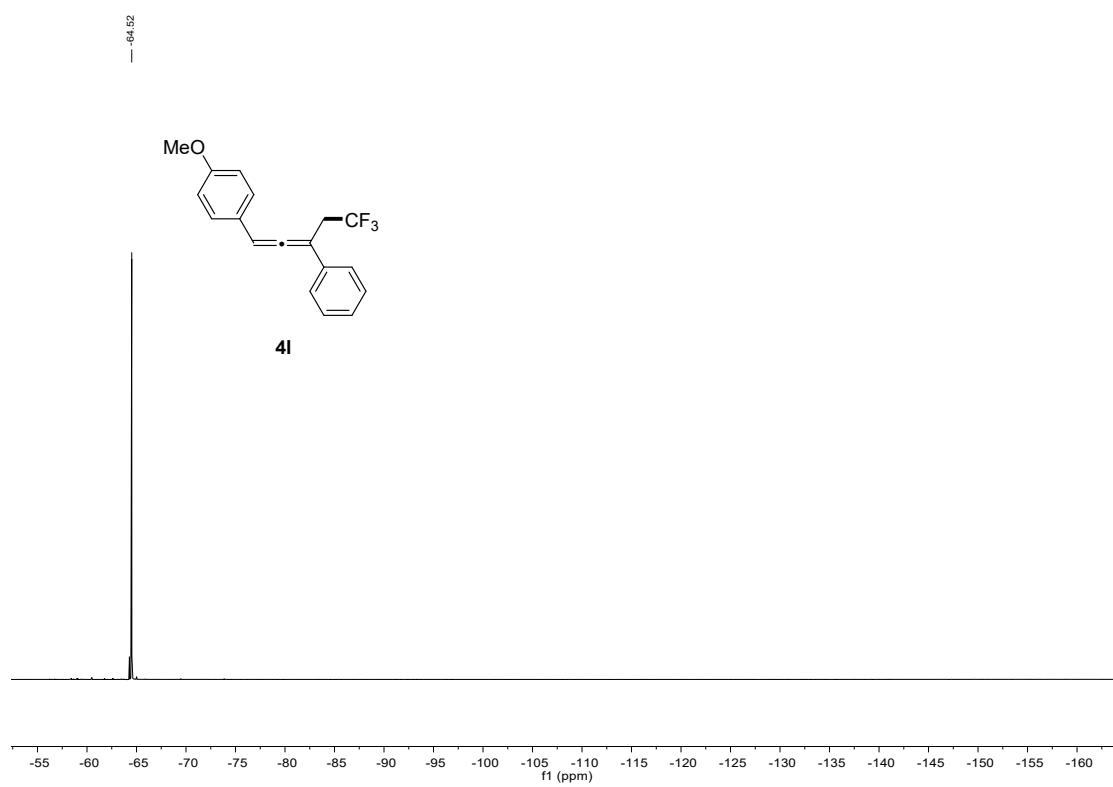

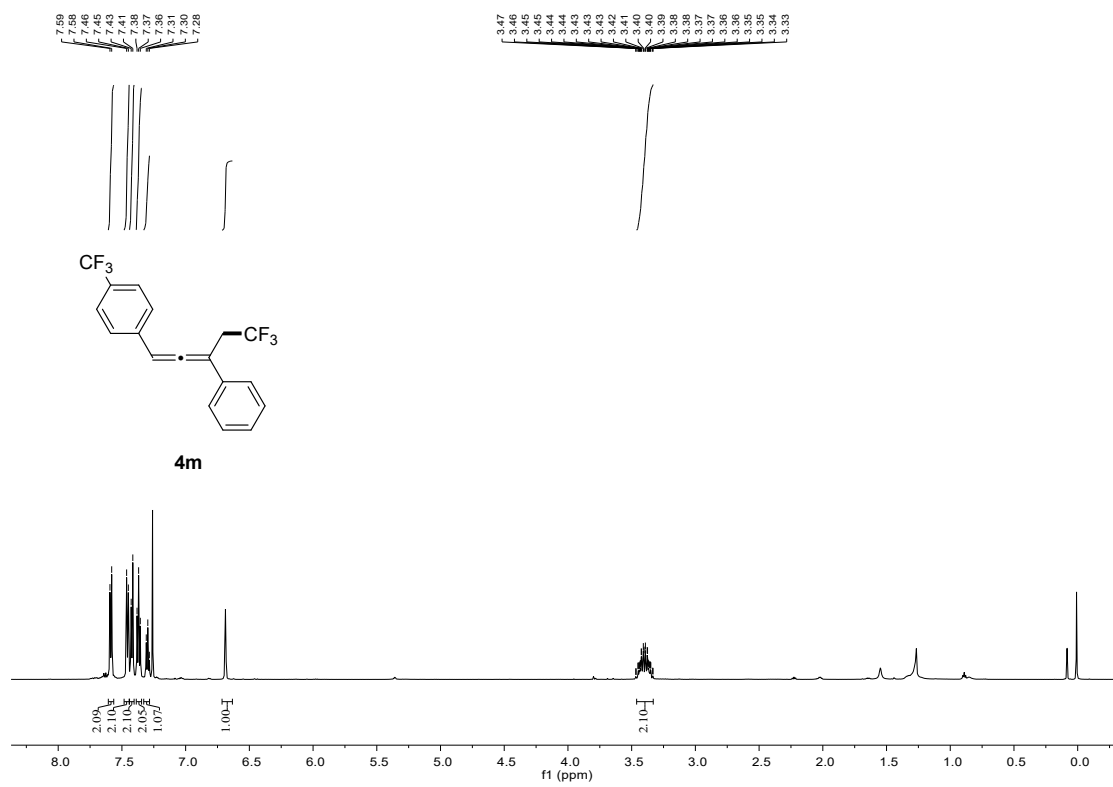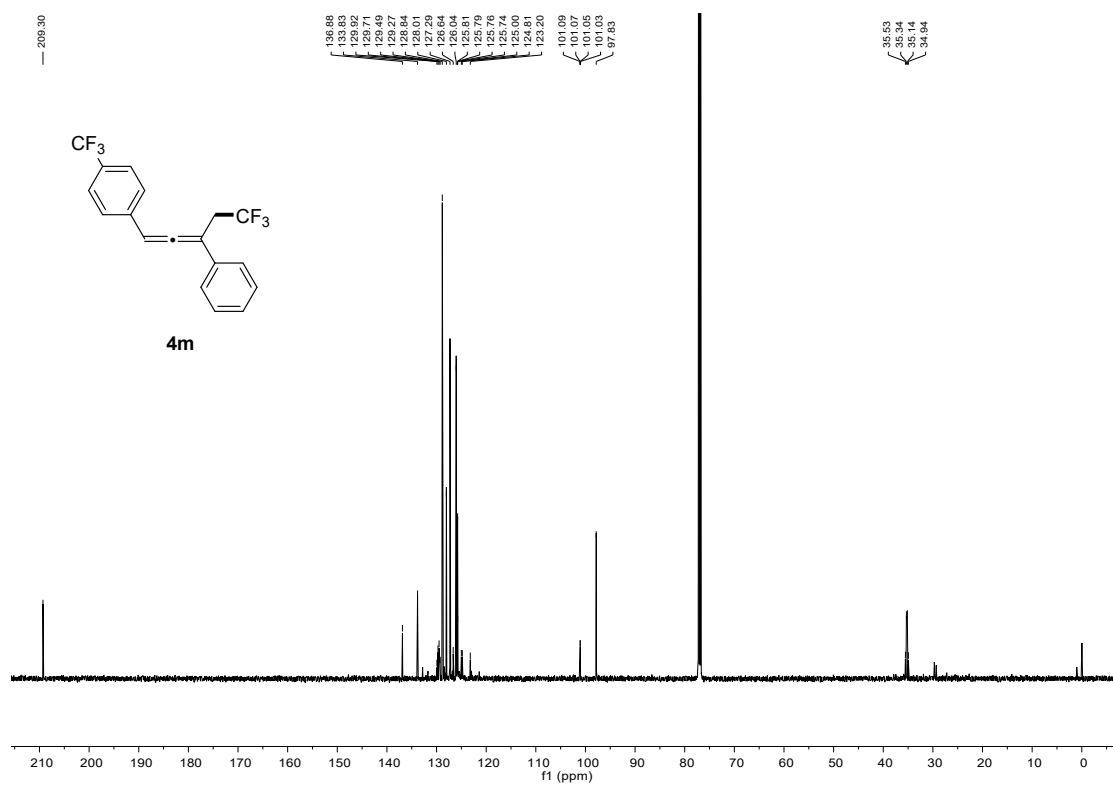



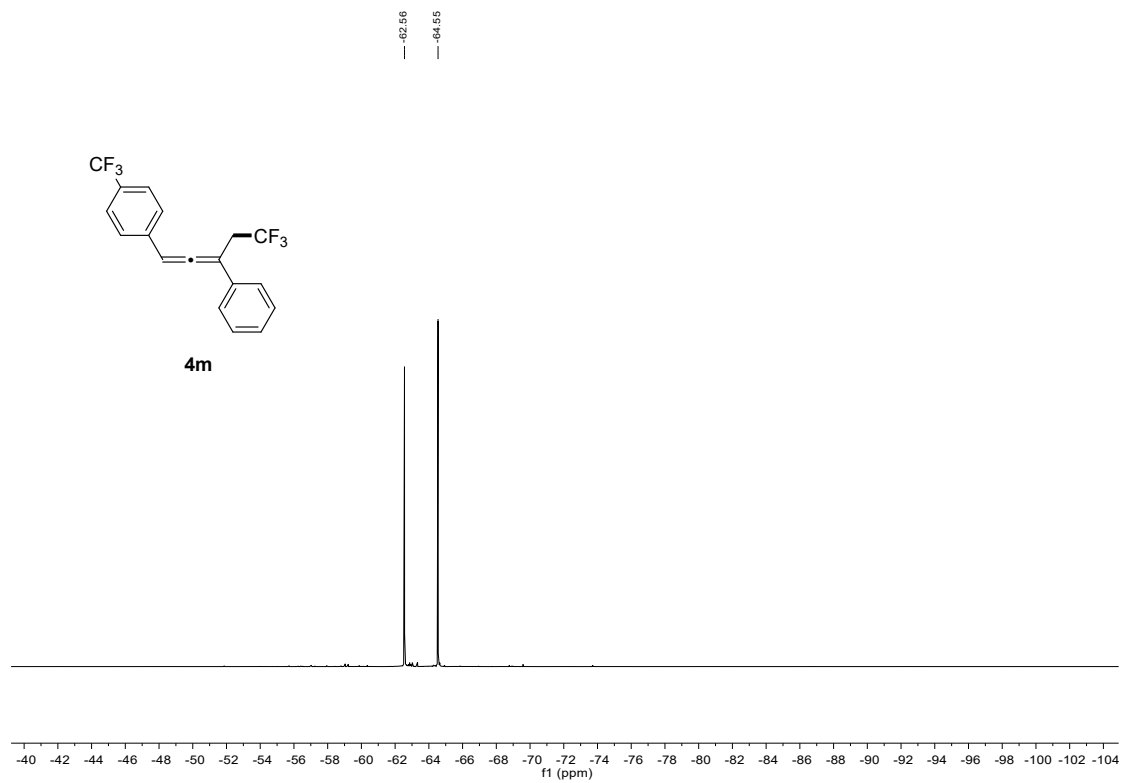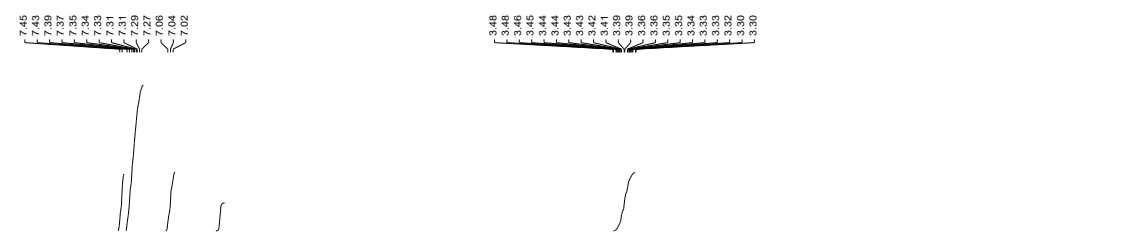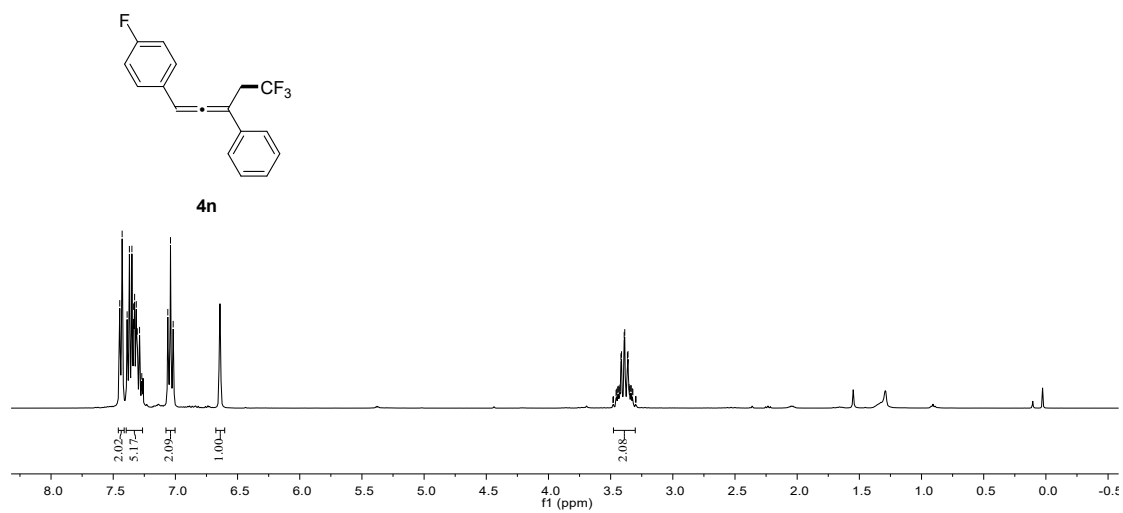

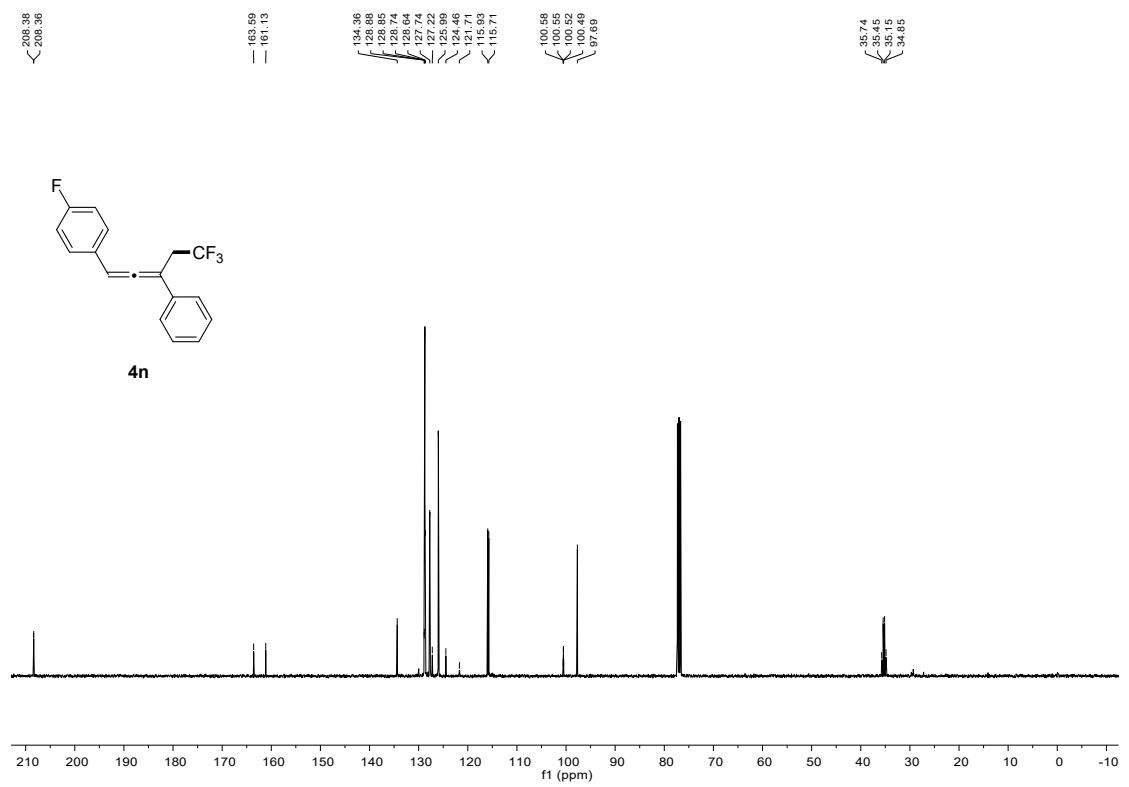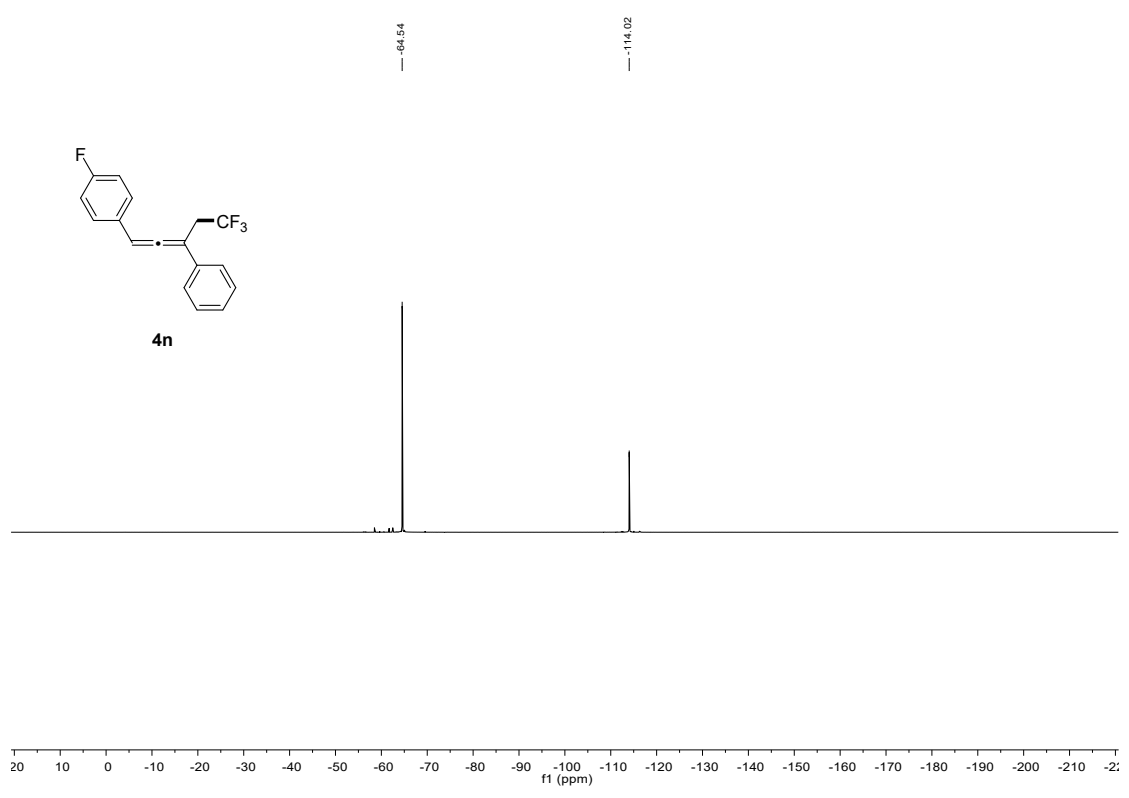

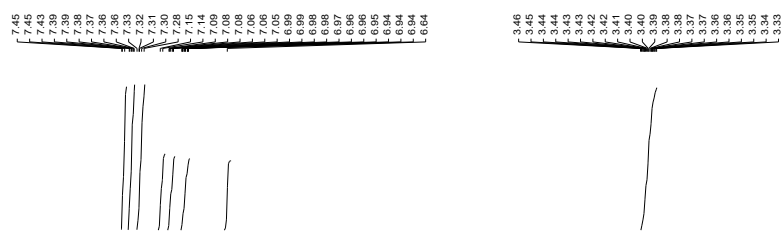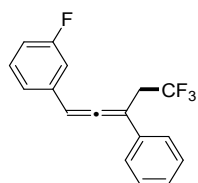

4o

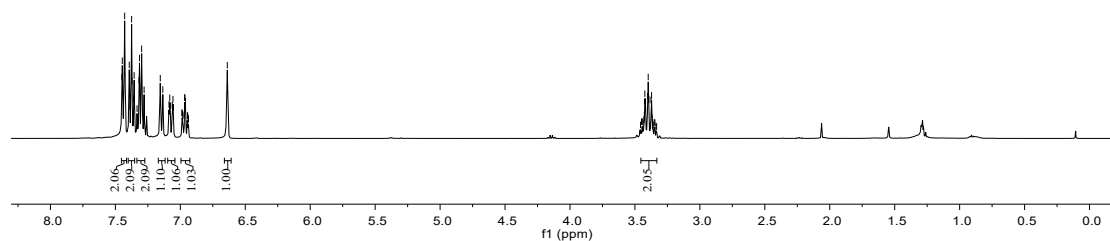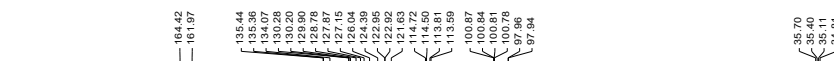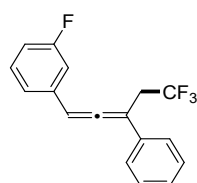

4o

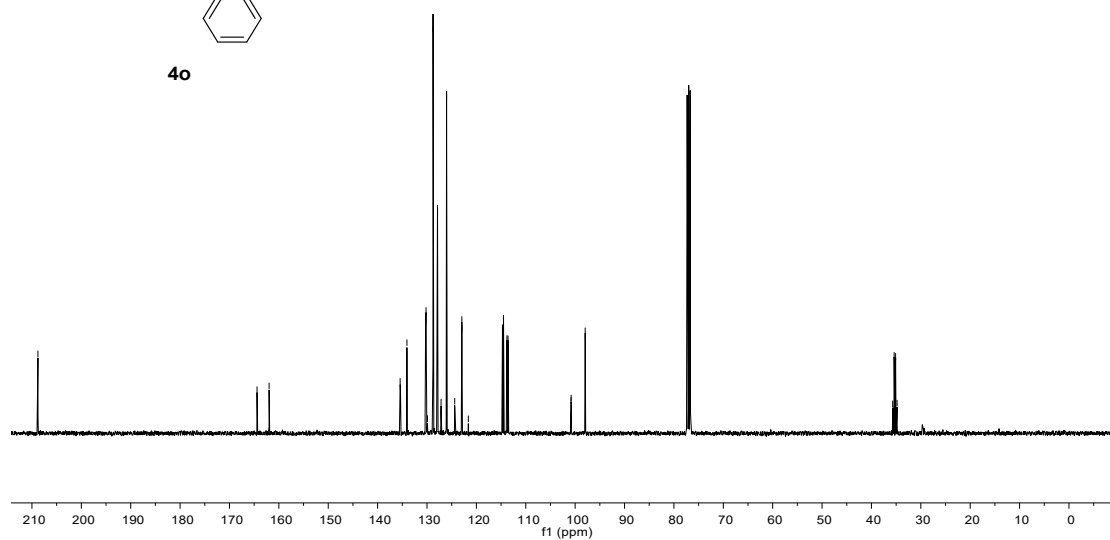

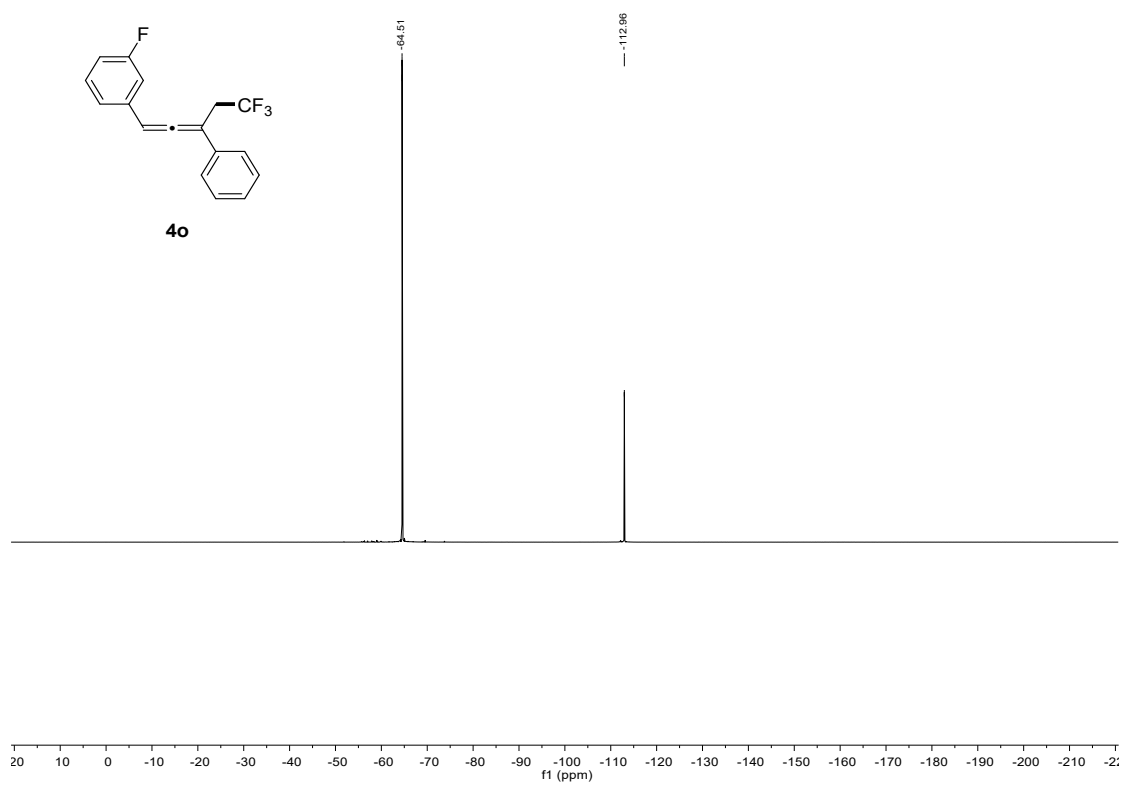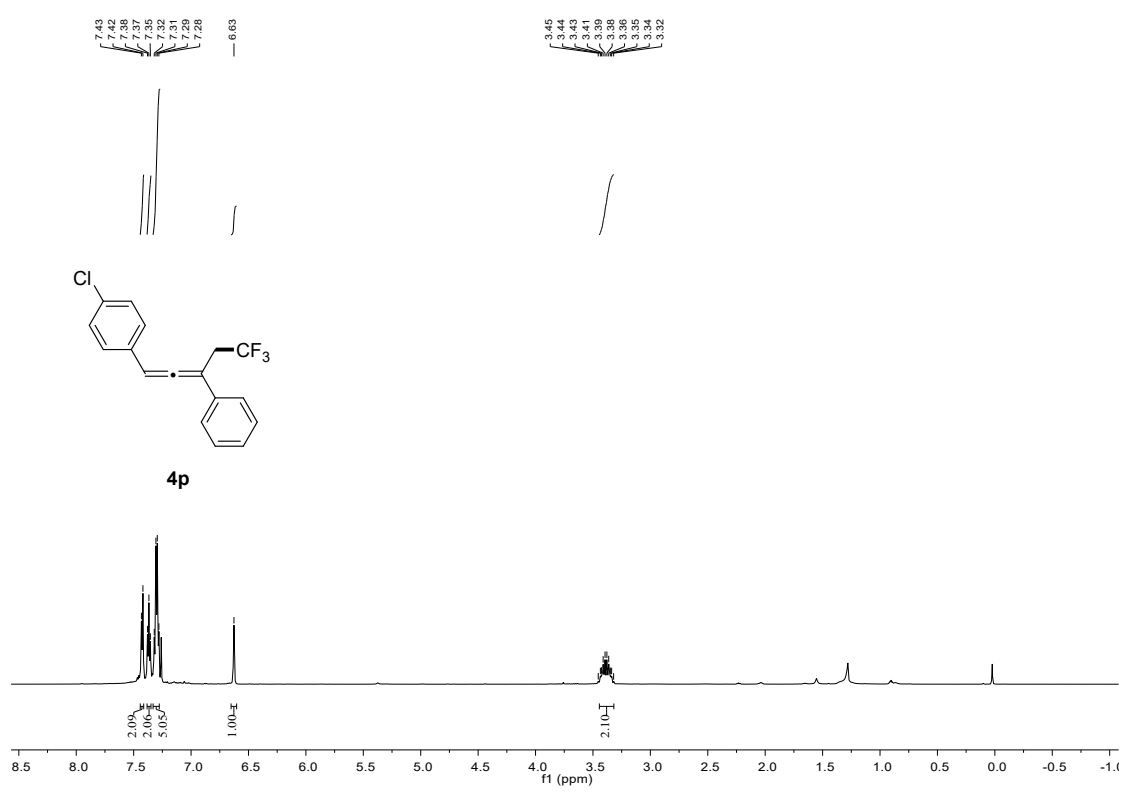

— 208.67

134.16  
133.85  
131.45  
129.01  
128.76  
128.33  
127.72  
126.71  
126.00  
124.87  
123.03

100.77  
100.75  
100.73  
100.70  
97.78

35.55  
35.35  
35.15  
34.96

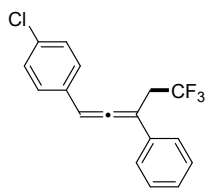

4p

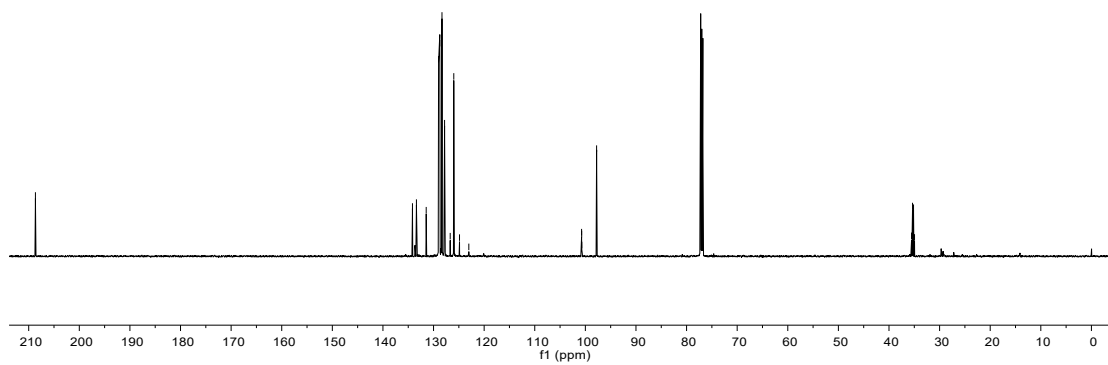

— -64.52

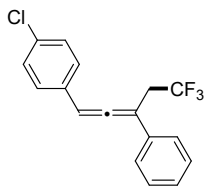

4p

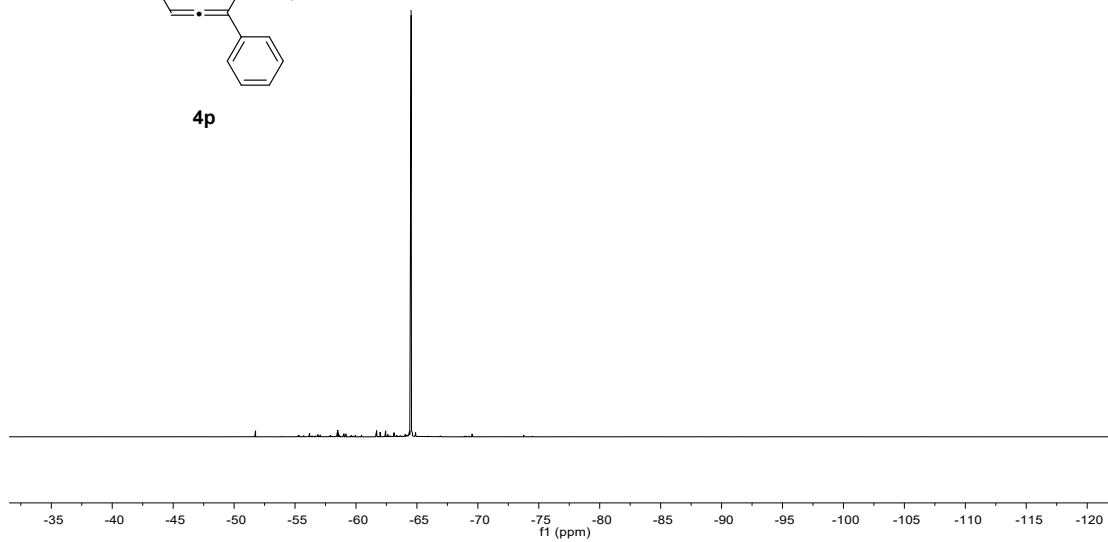

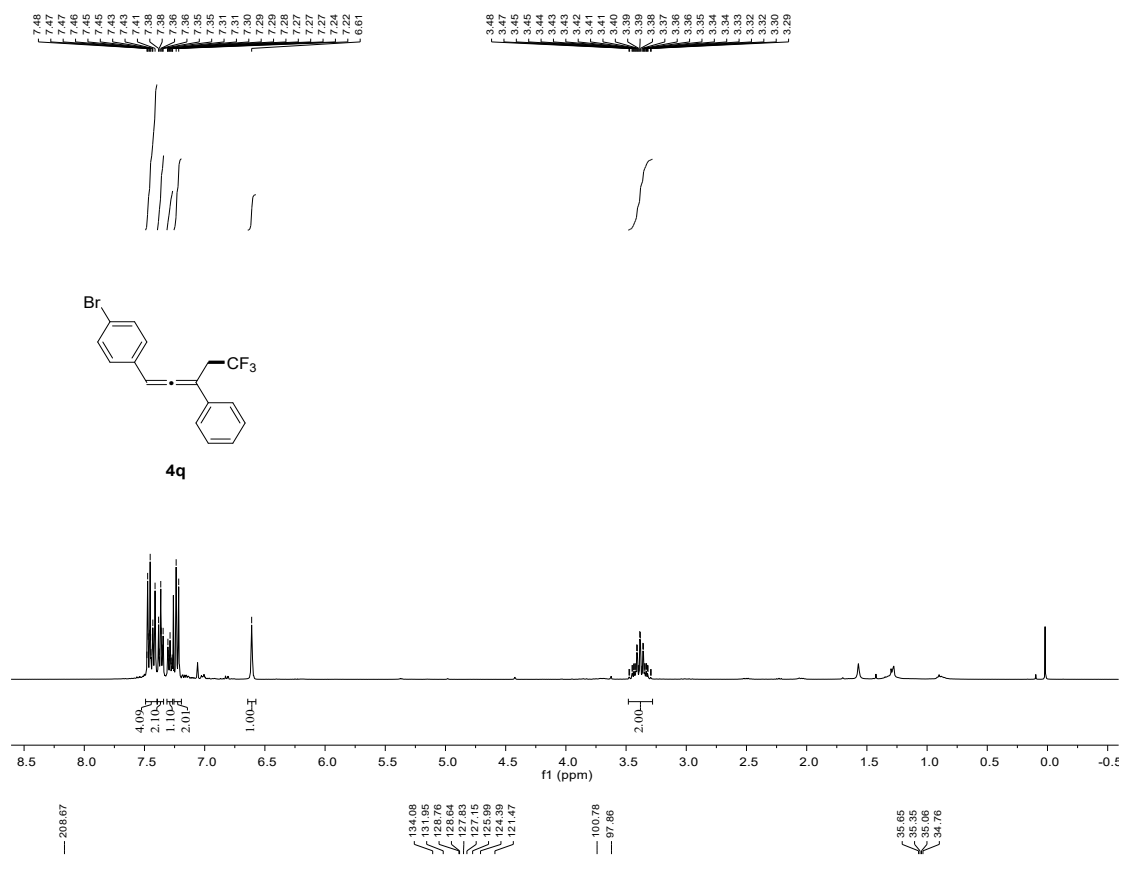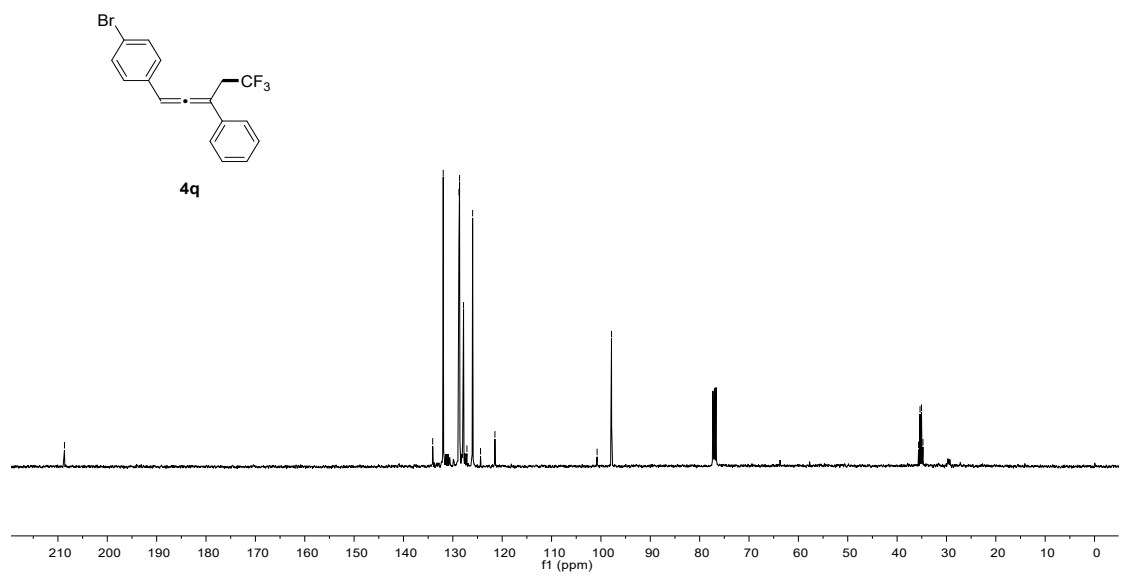

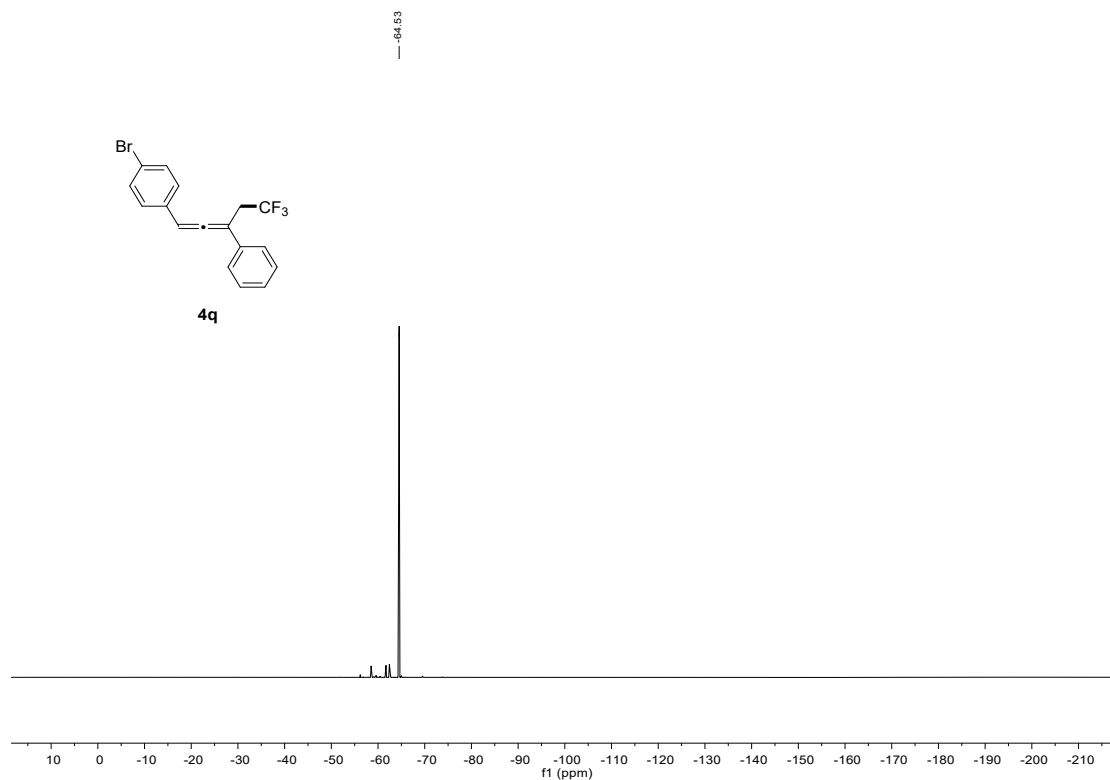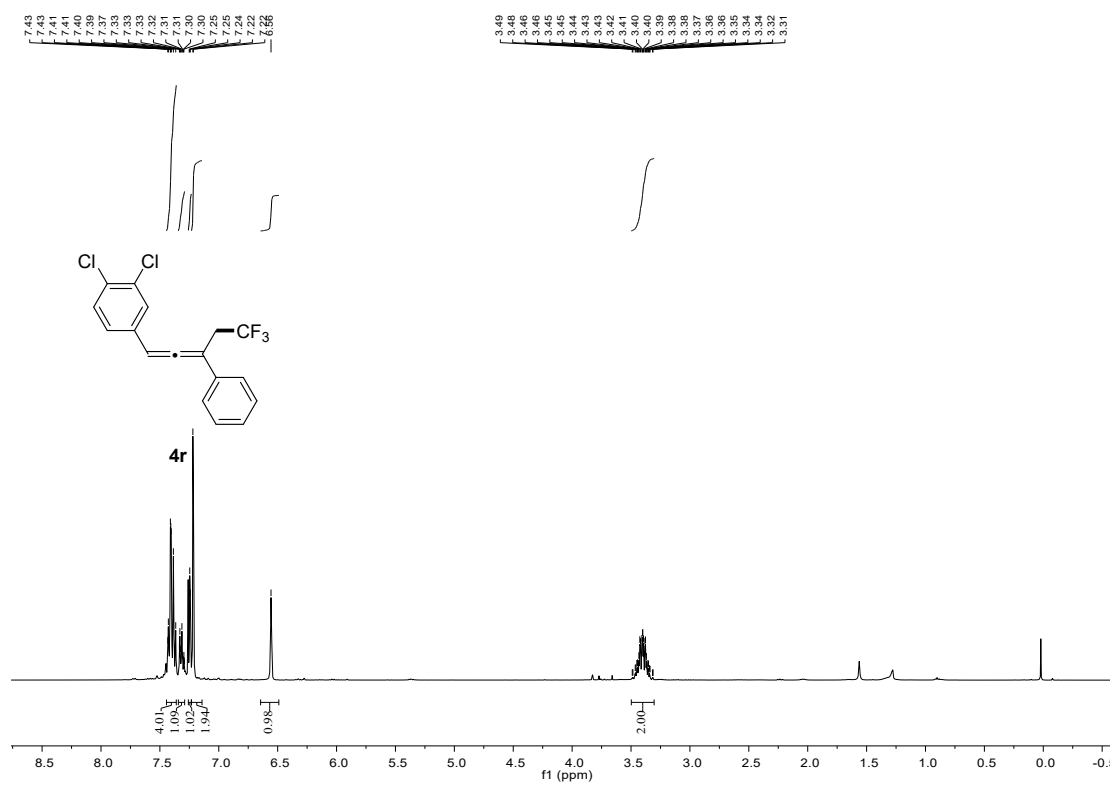

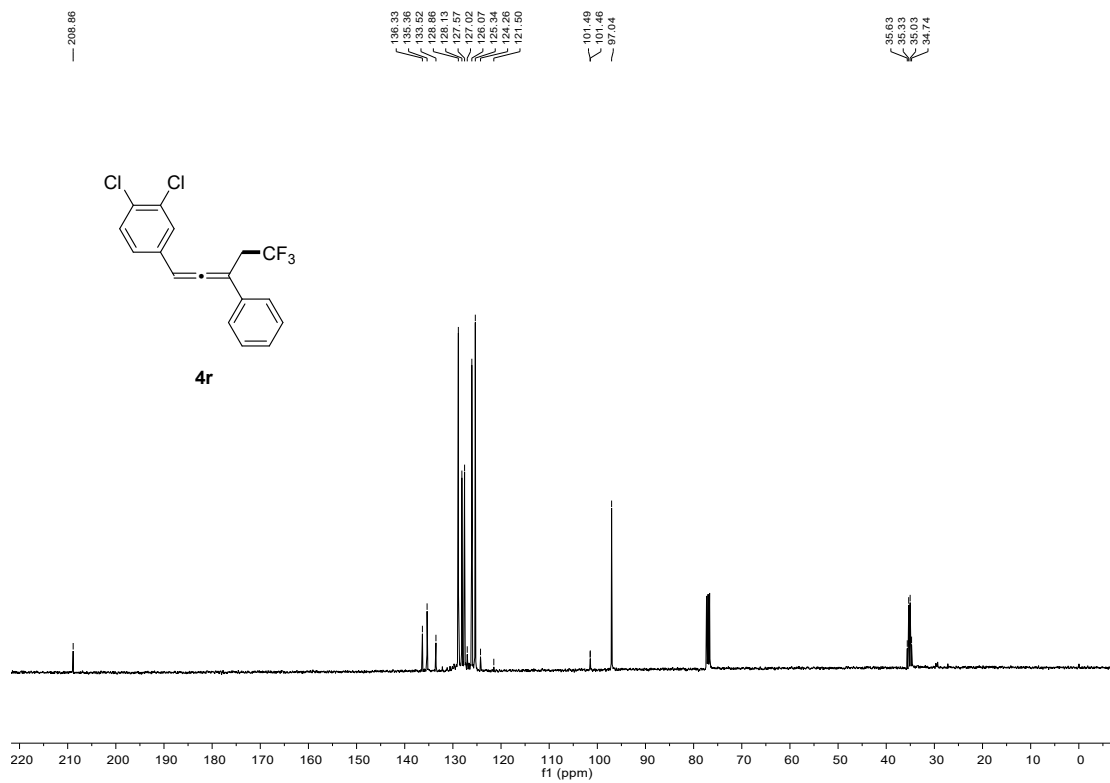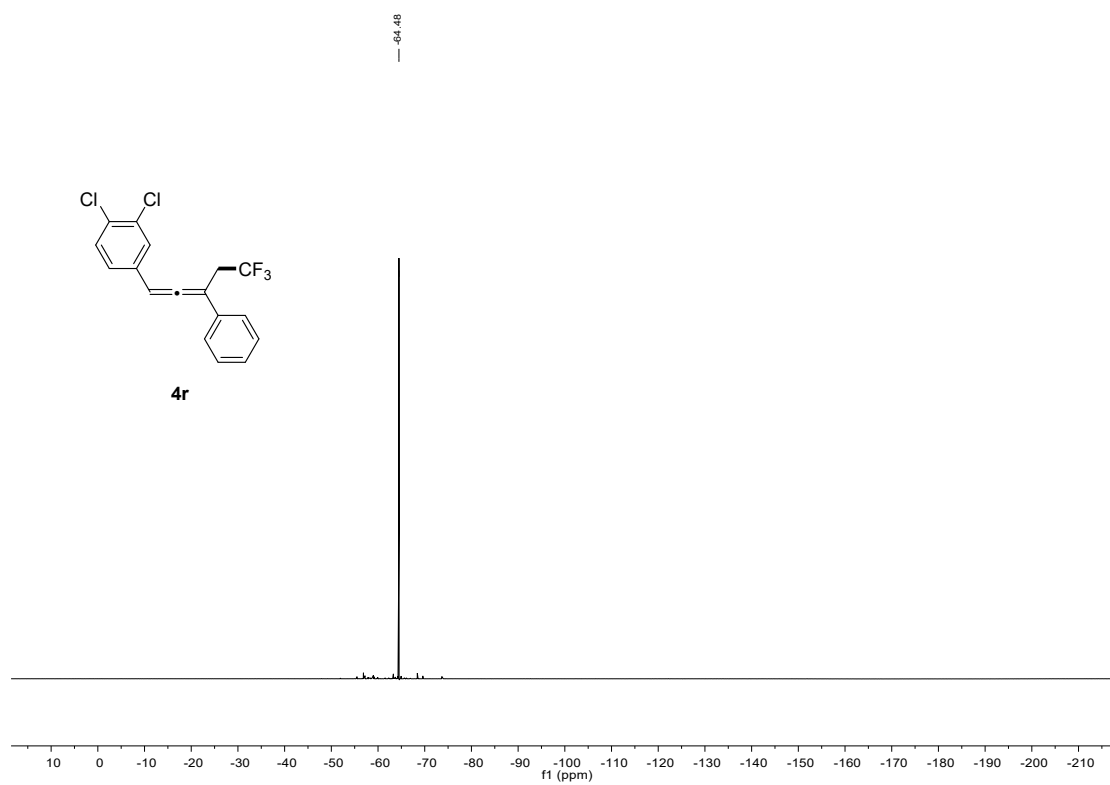



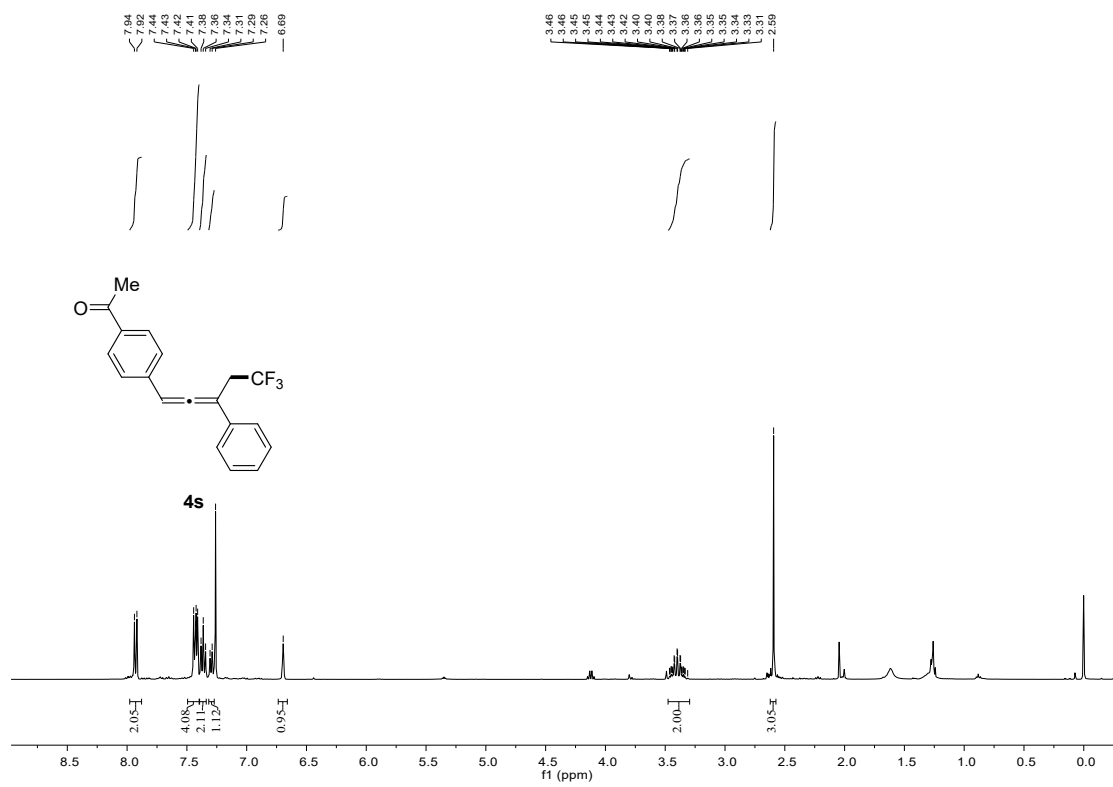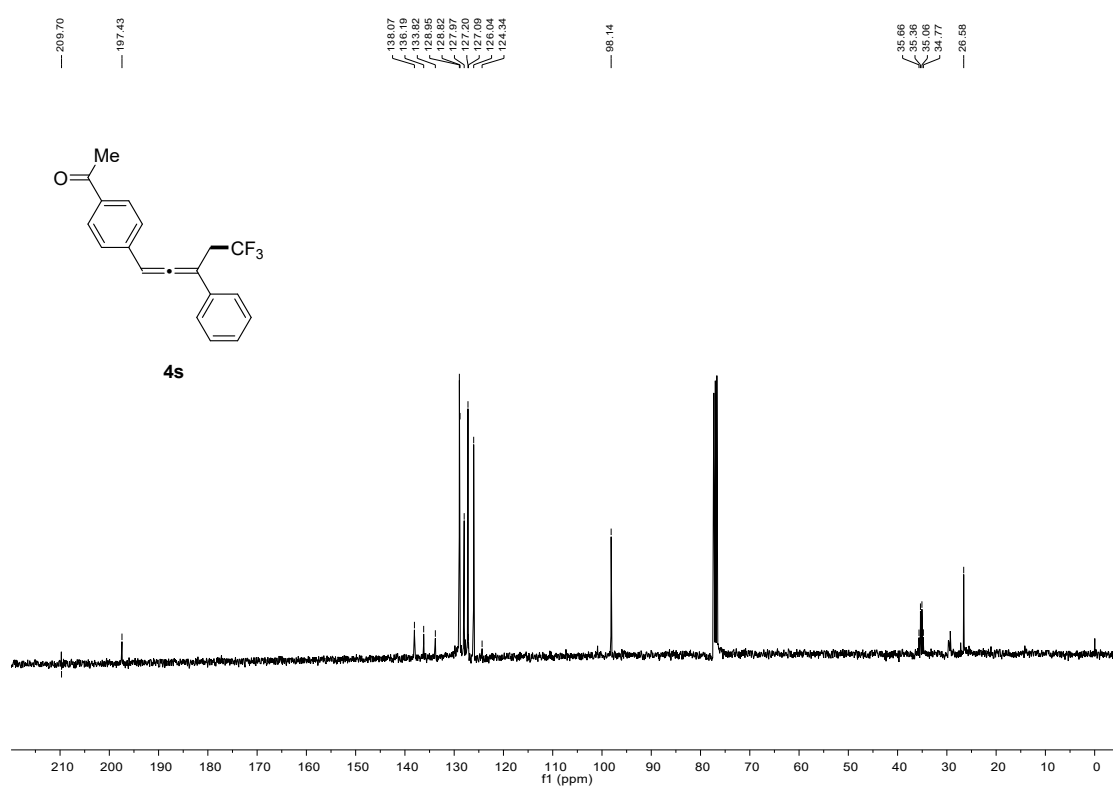

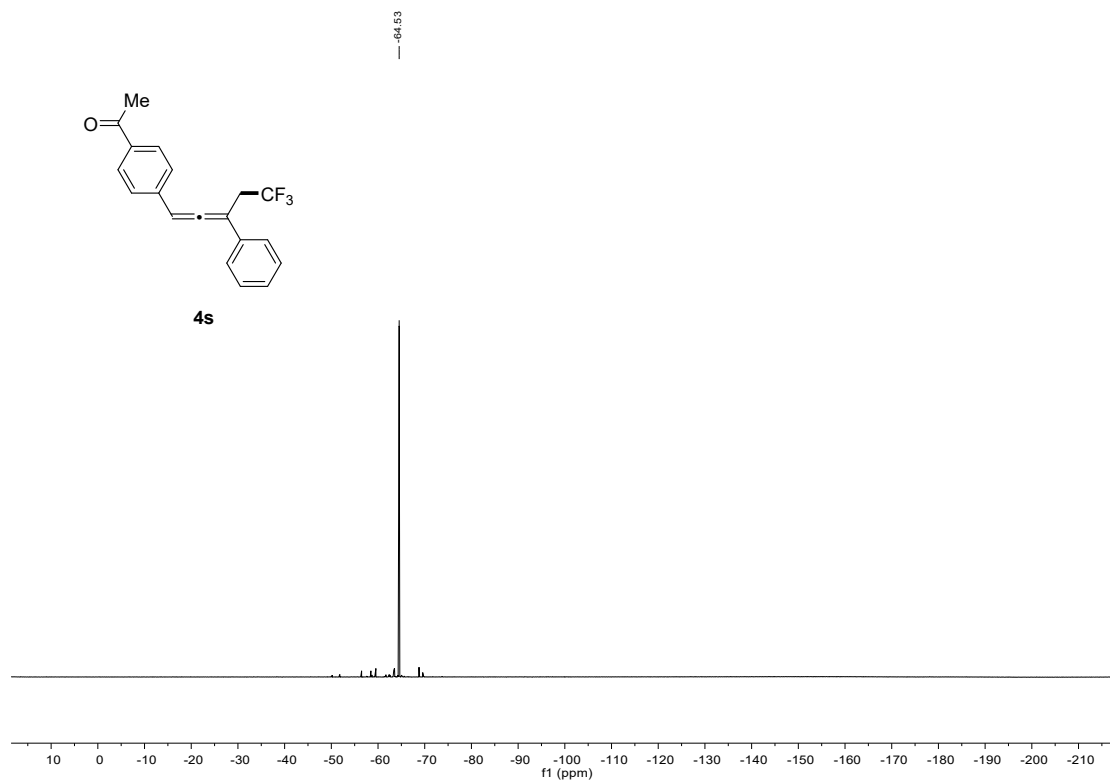

7.44 7.44 7.42 7.38 7.37 7.35 7.35 7.31 7.31 7.29 7.29 7.20 7.20 7.18 6.65

3.48 3.48 3.46 3.45 3.45 3.43 3.43 3.42 3.42 3.40 3.40 3.38 3.38 3.37 3.37 3.36 3.36 3.34 3.34 3.33 3.33 3.30 3.30

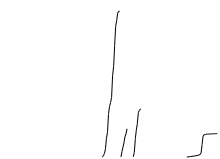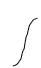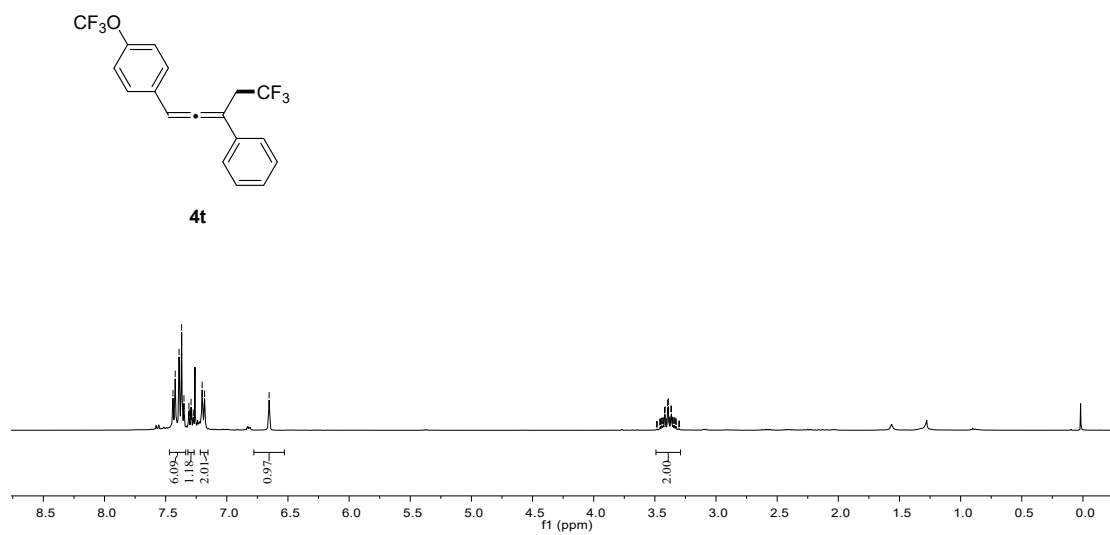

6.09 1.18 2.01 0.97 2.00

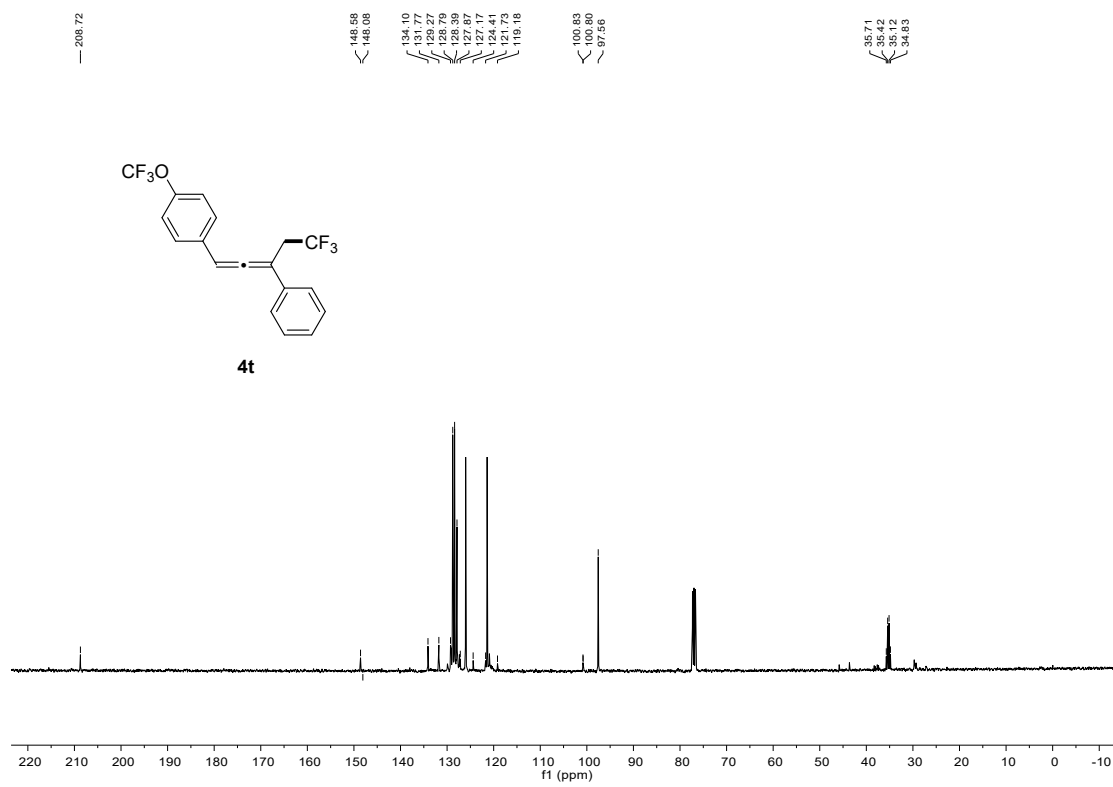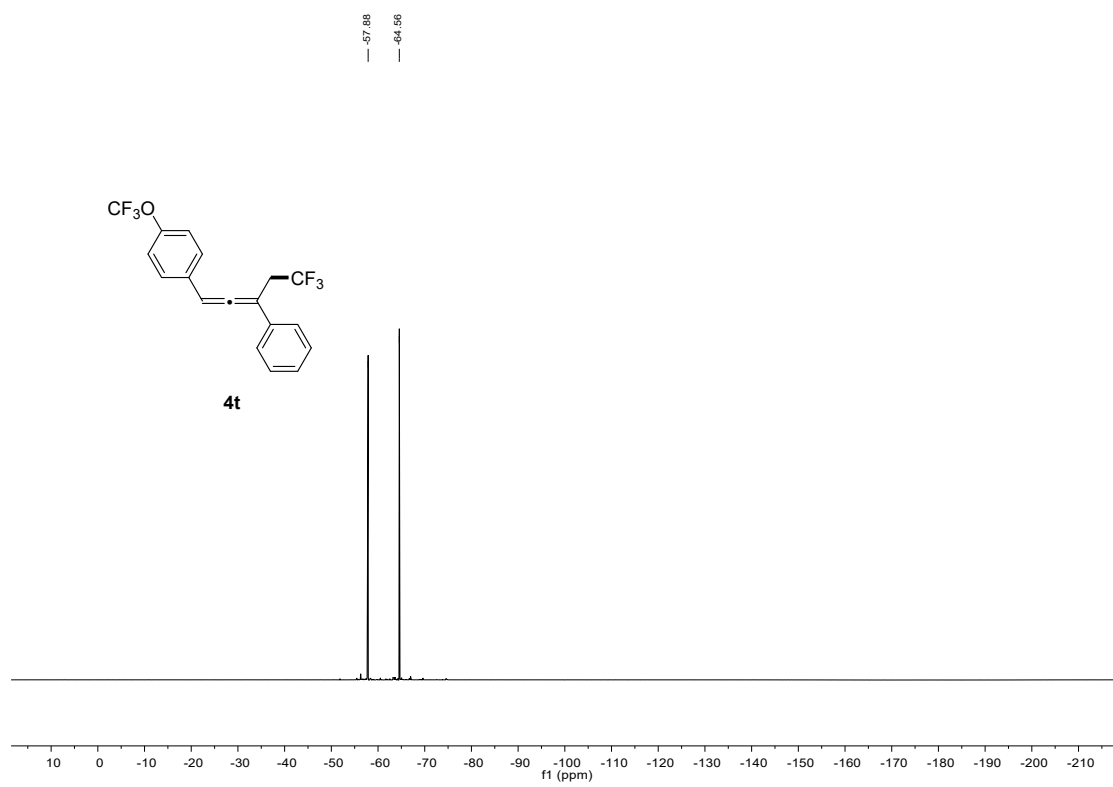

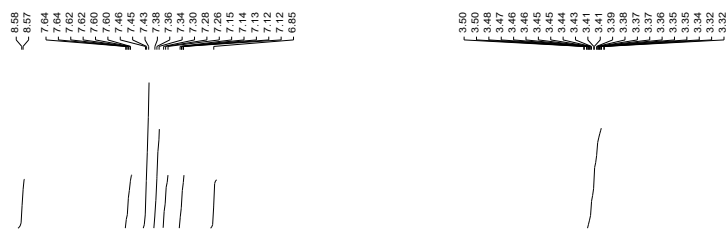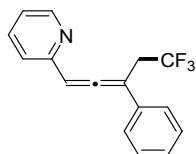

4u

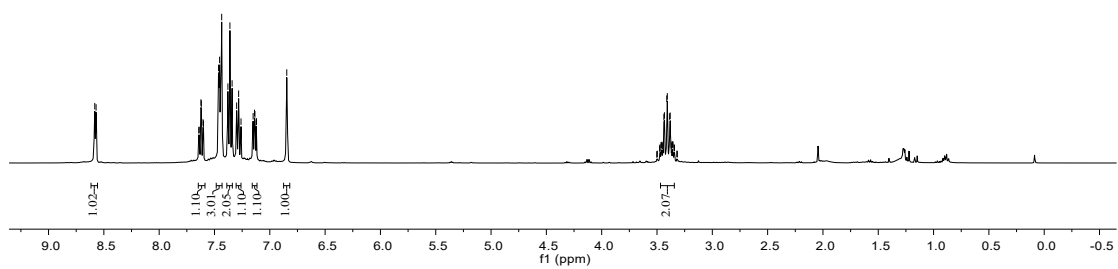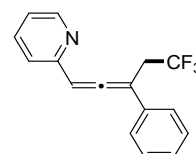

4u

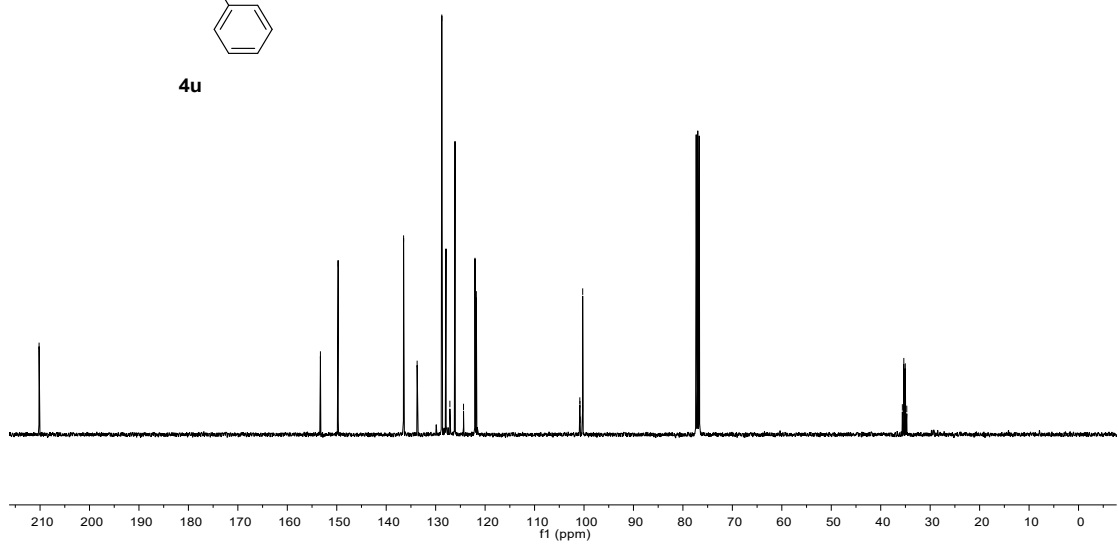

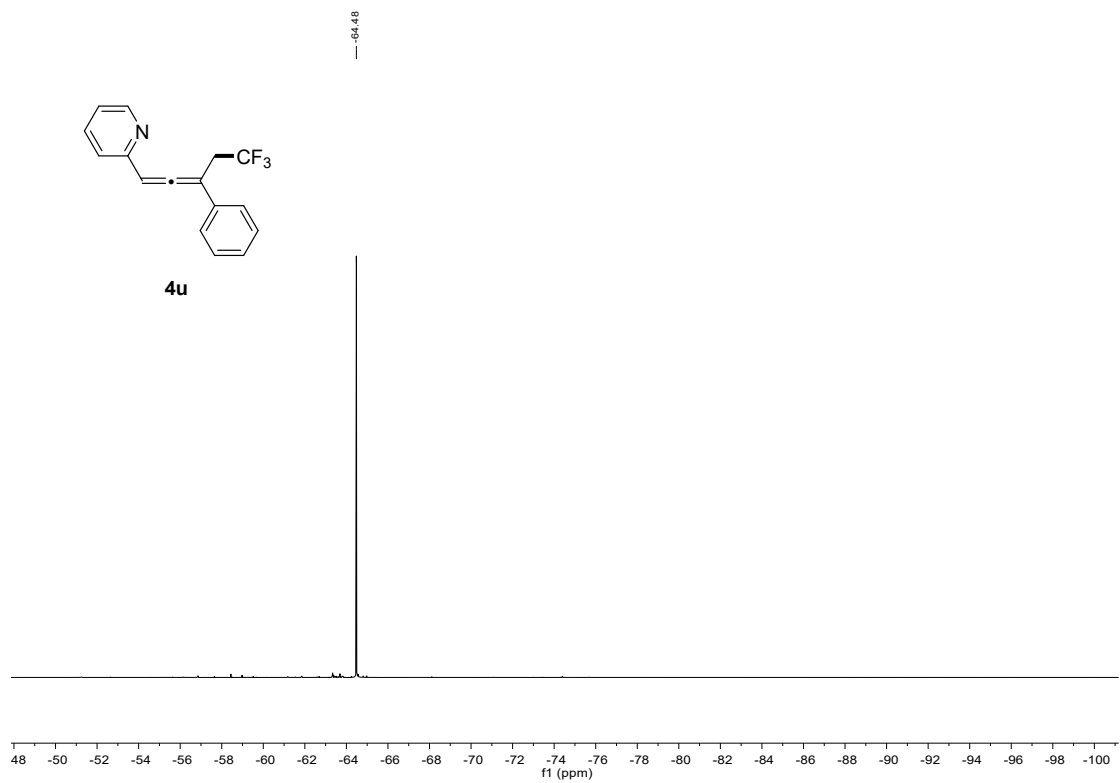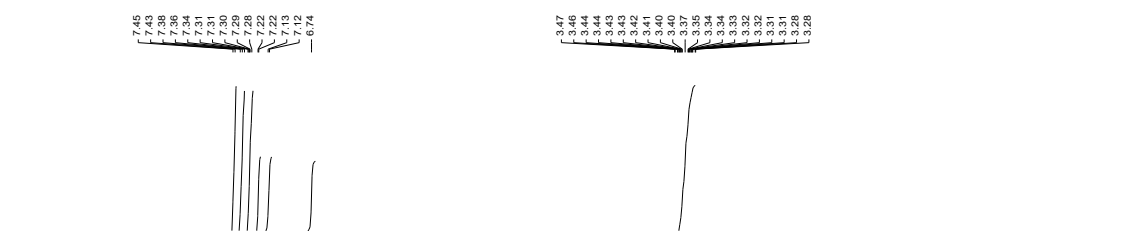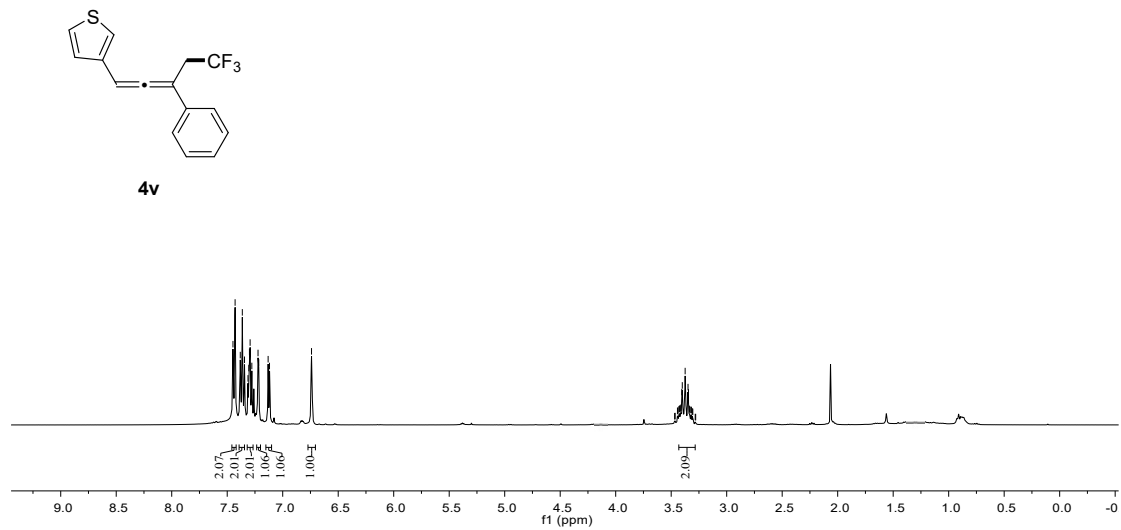

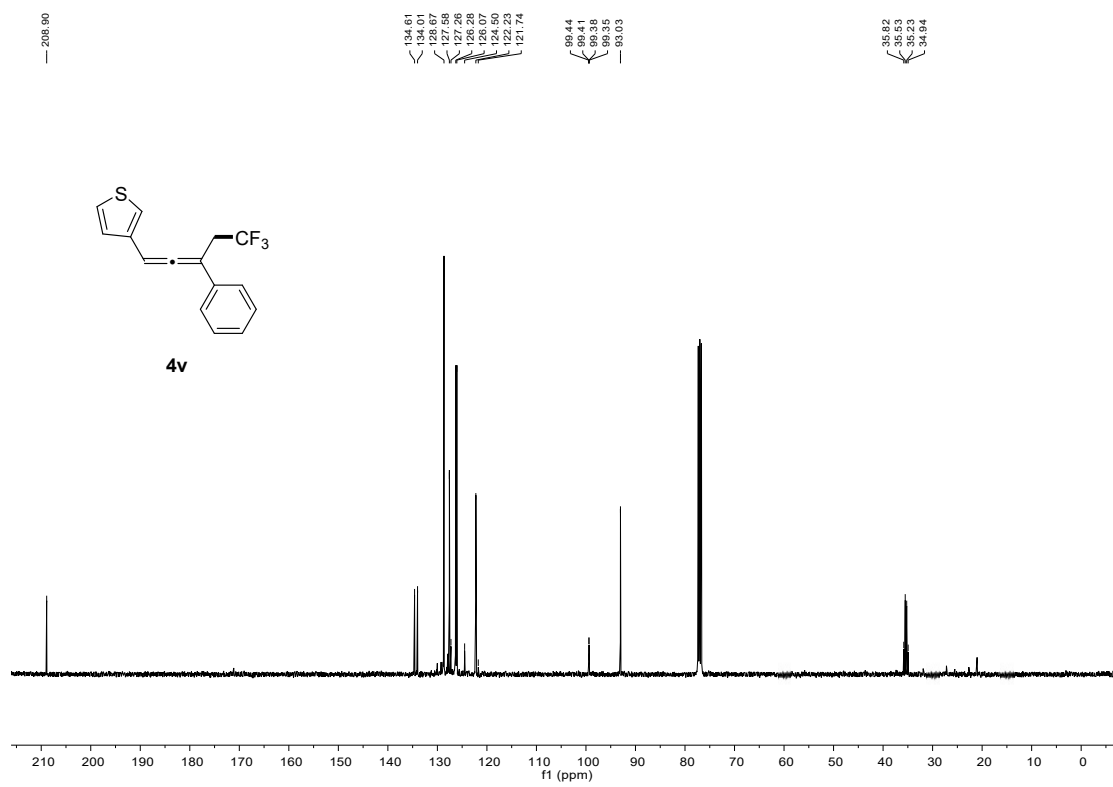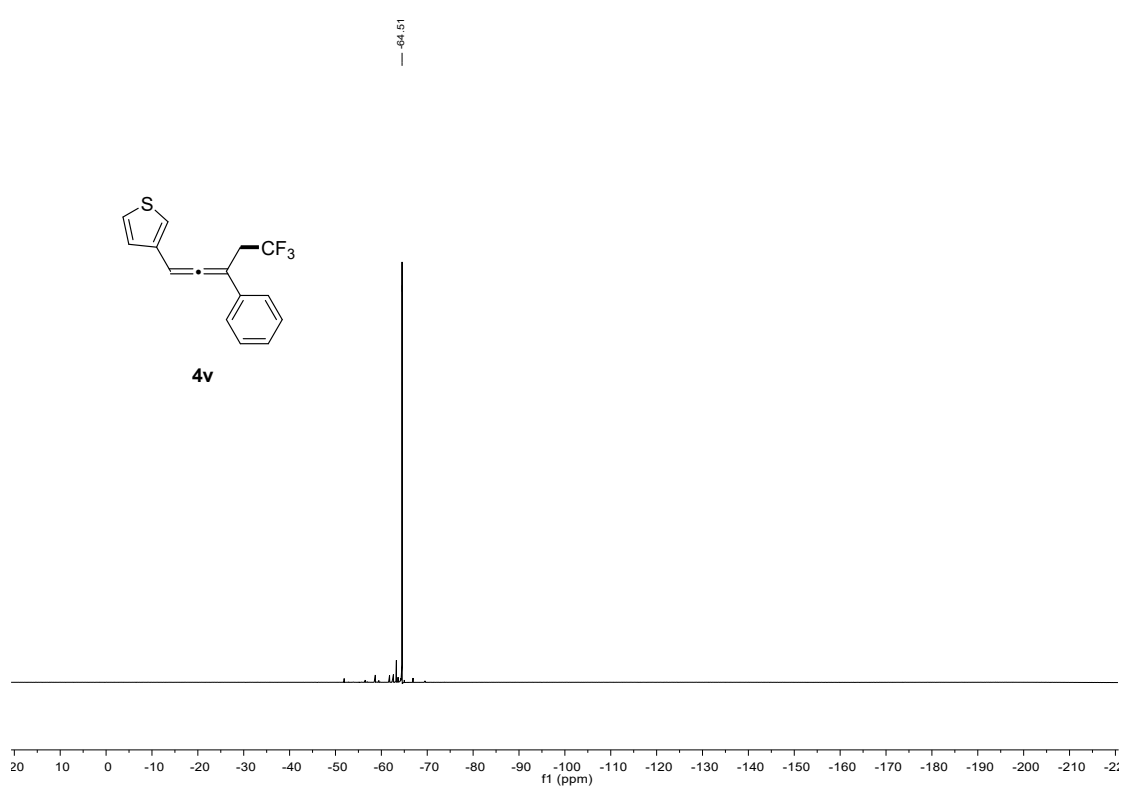

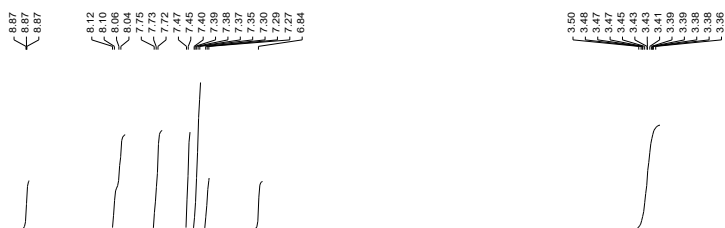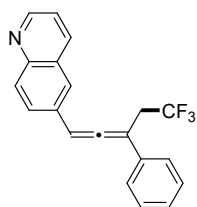

**4w**

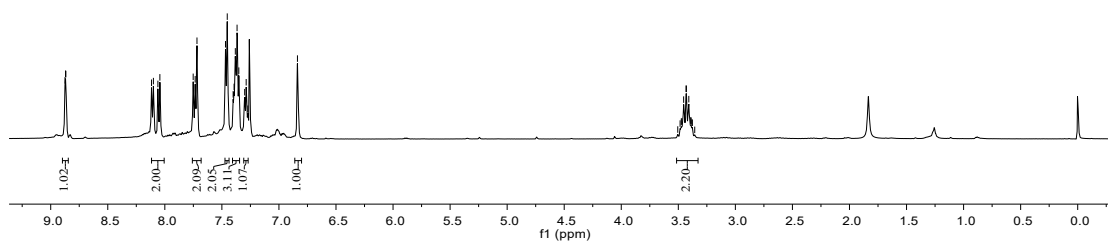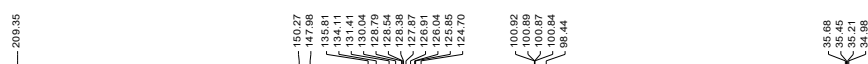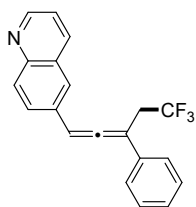

**4w**

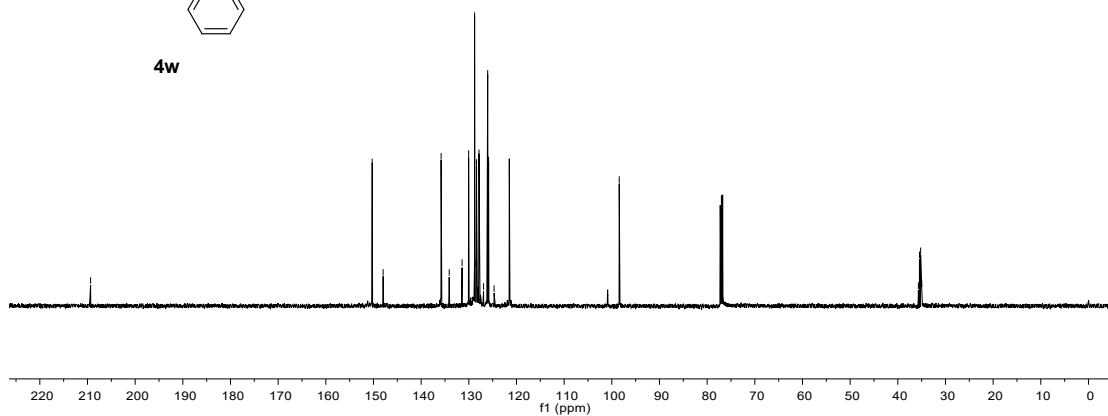

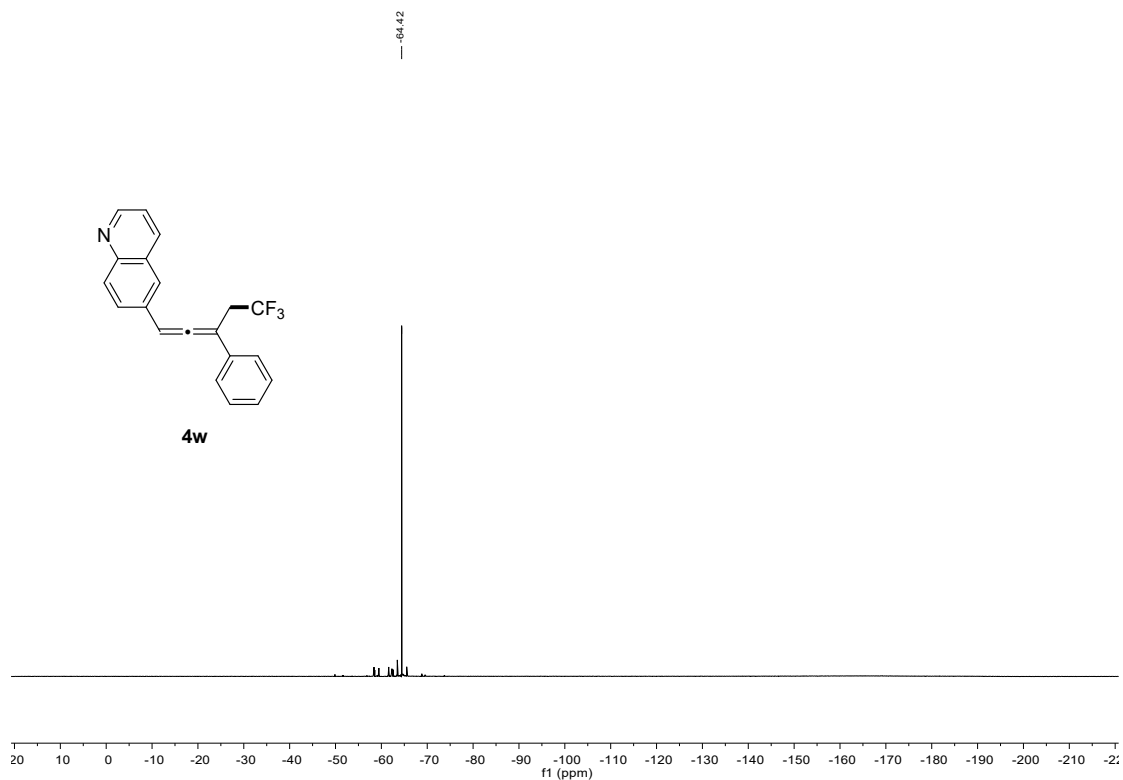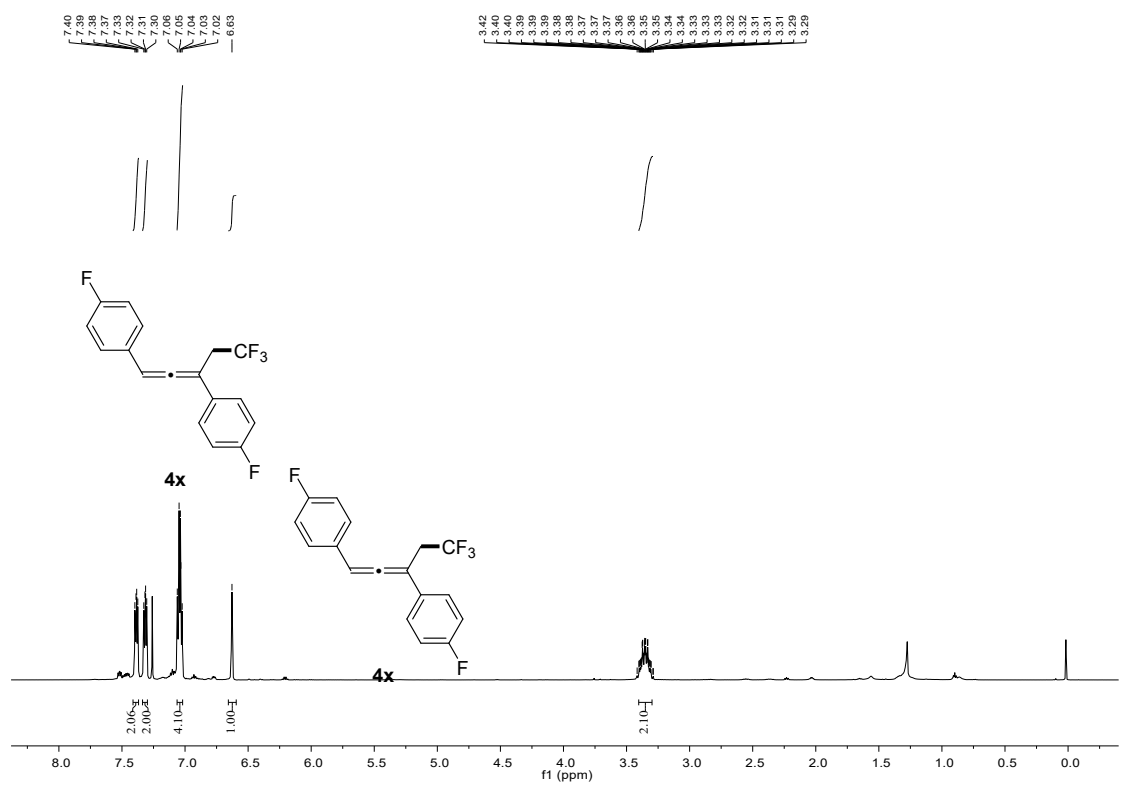



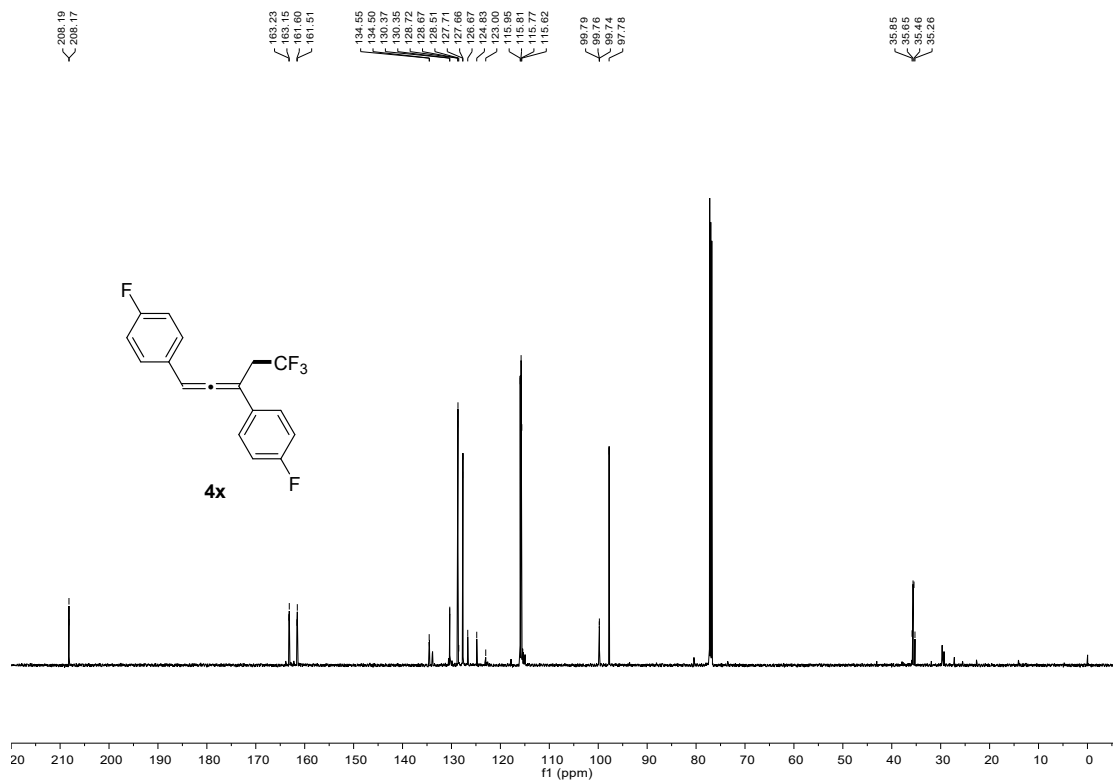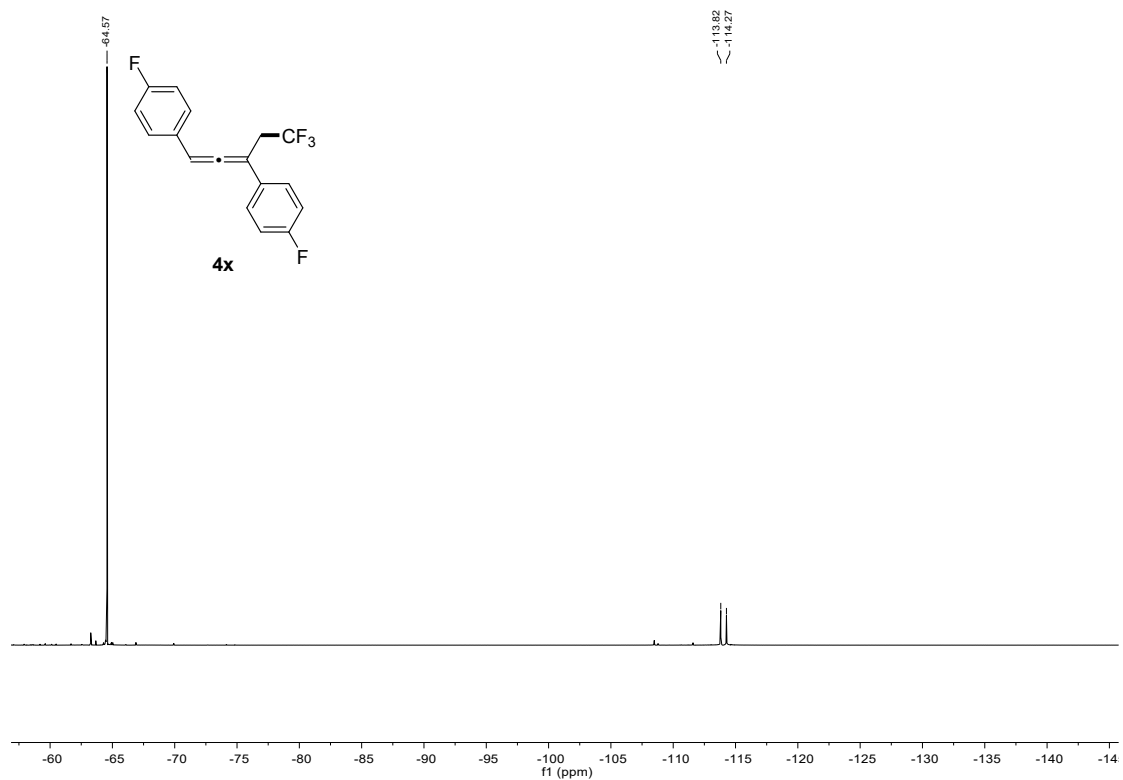

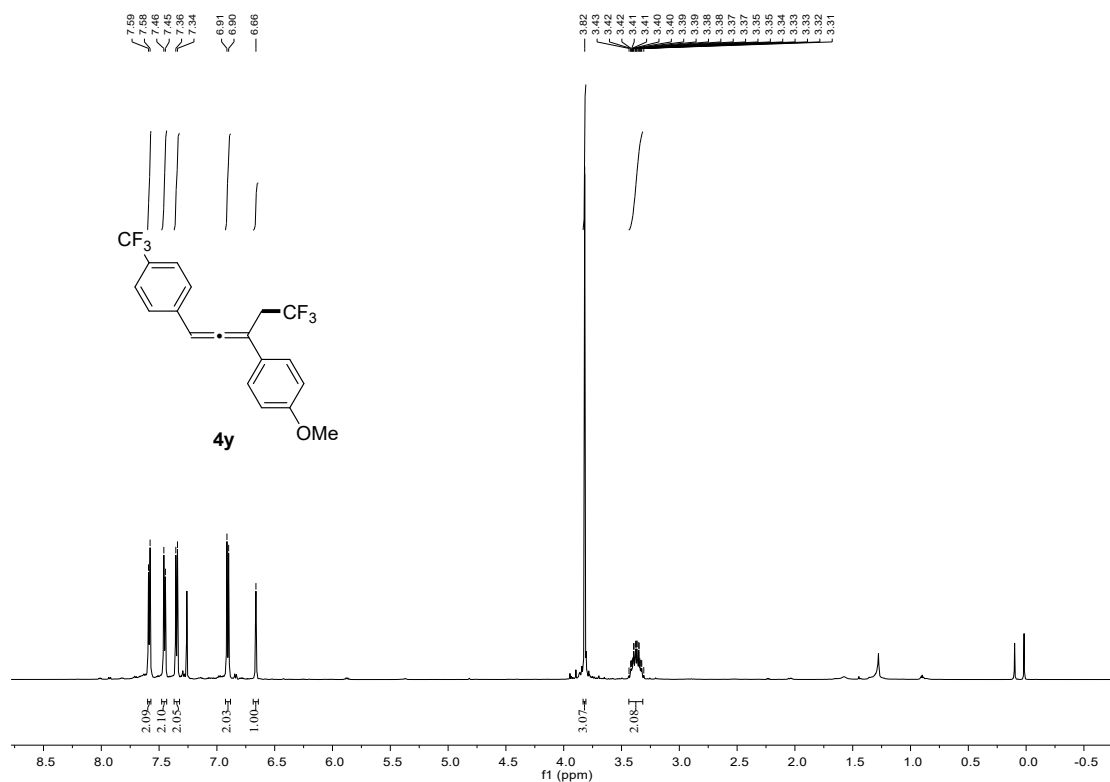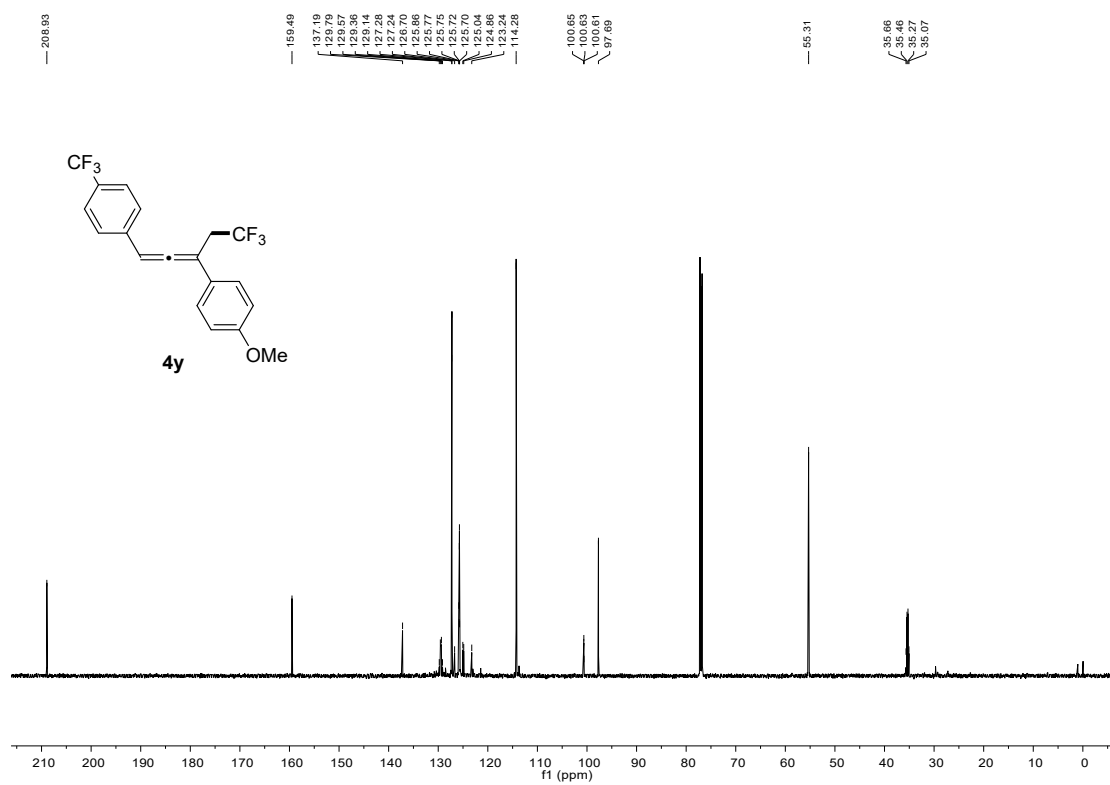

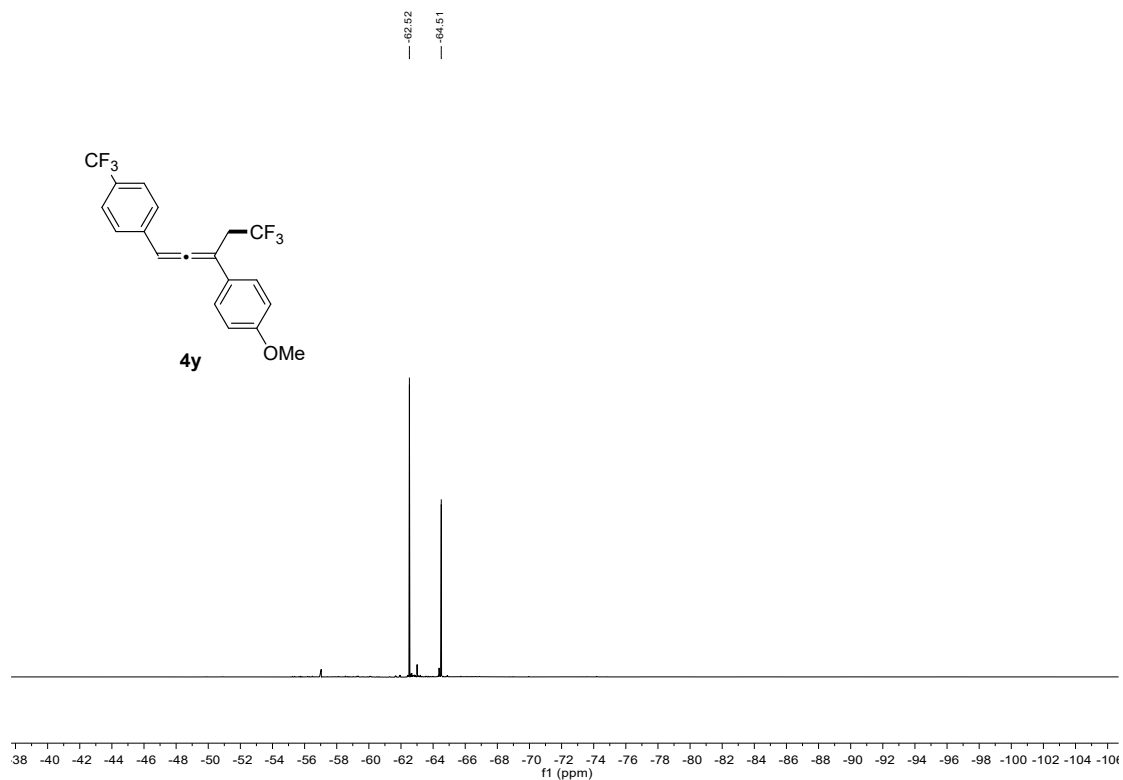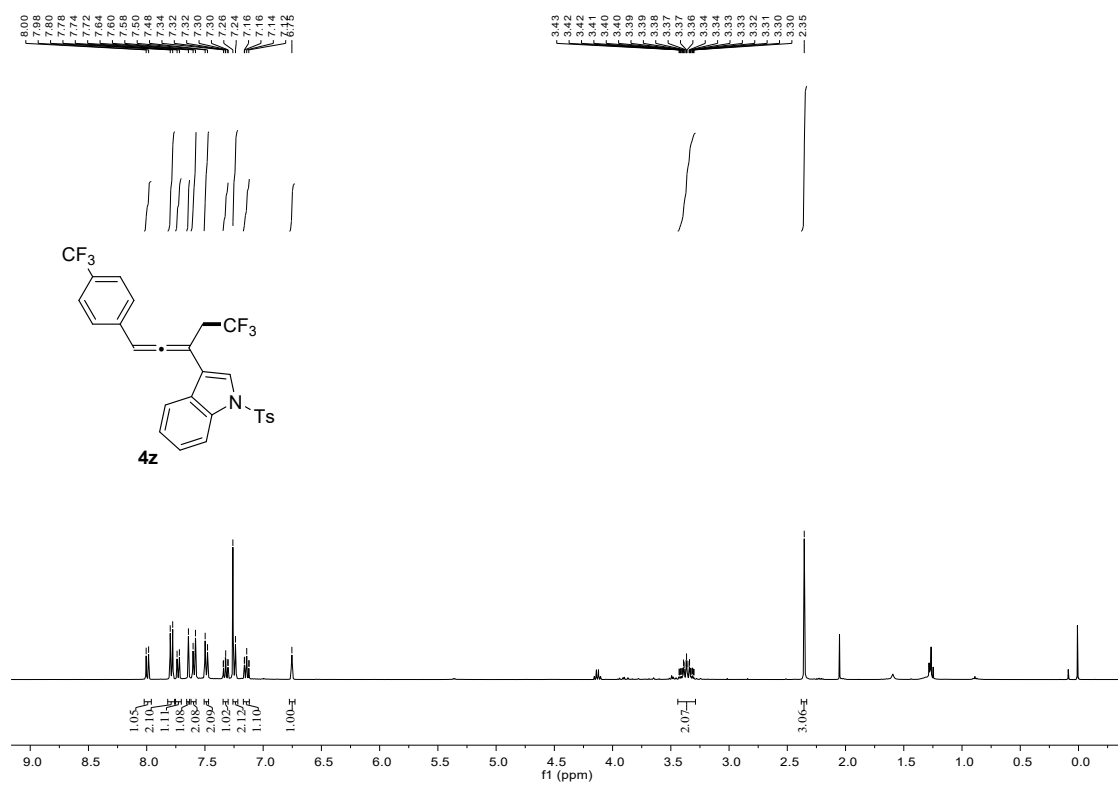

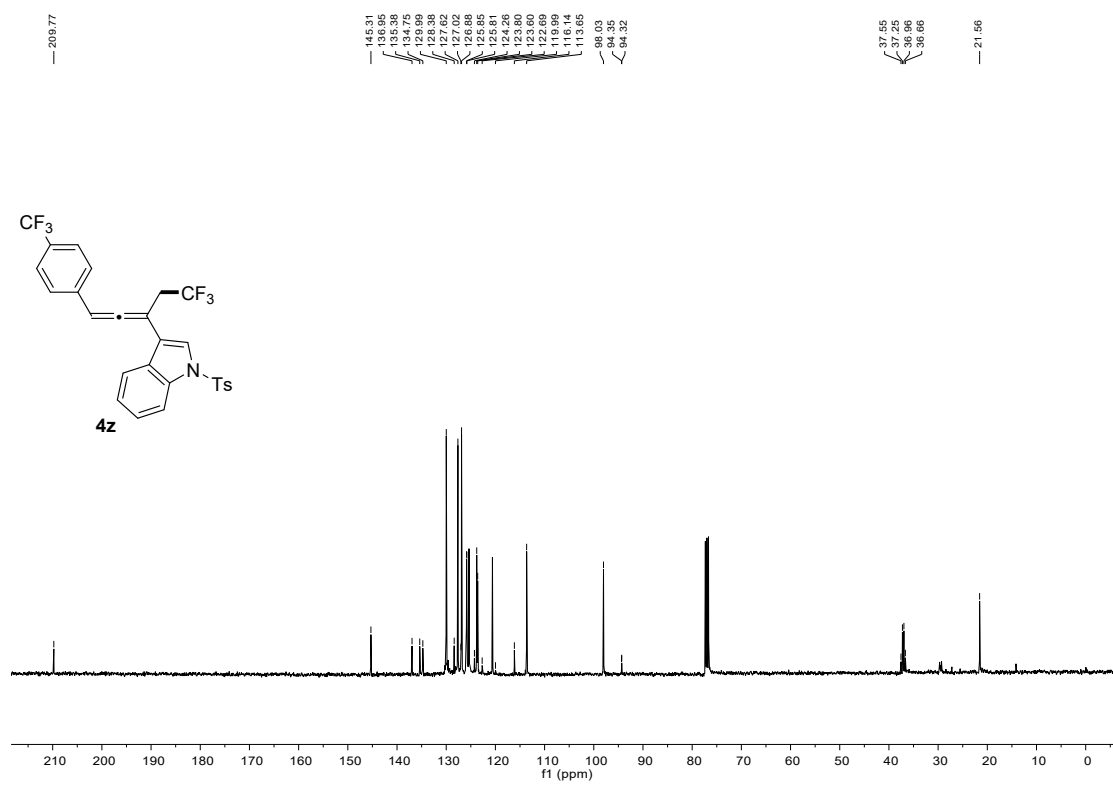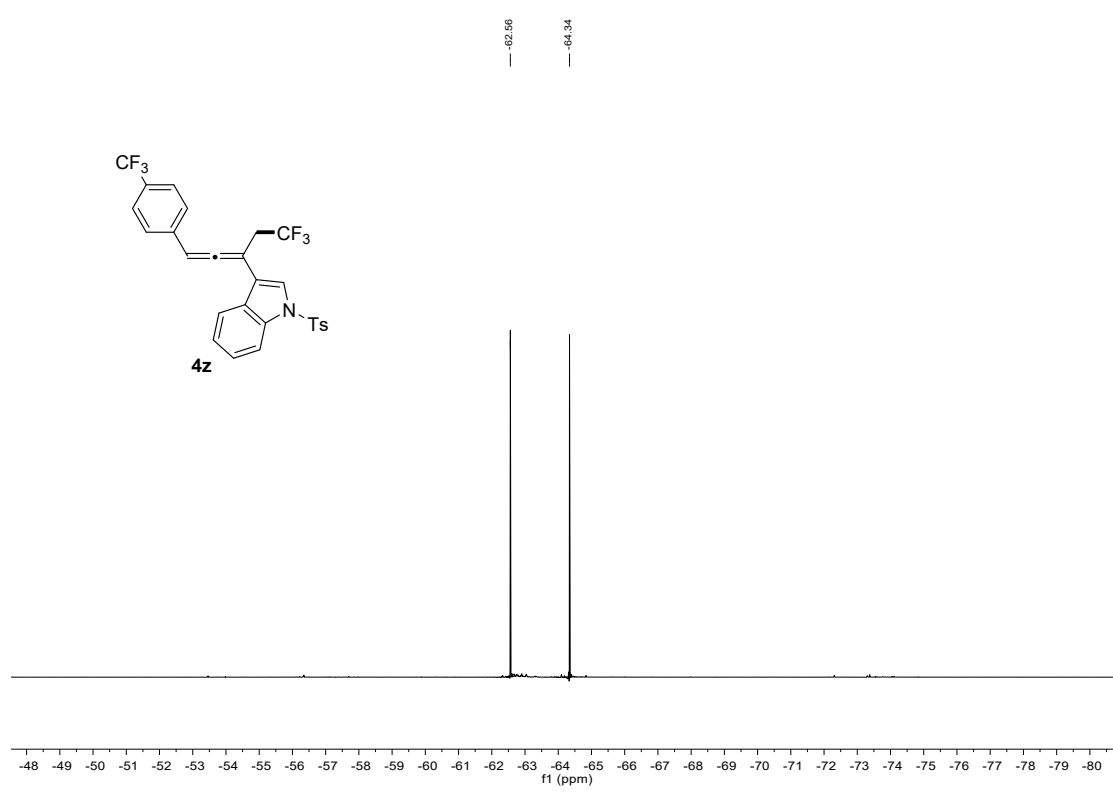

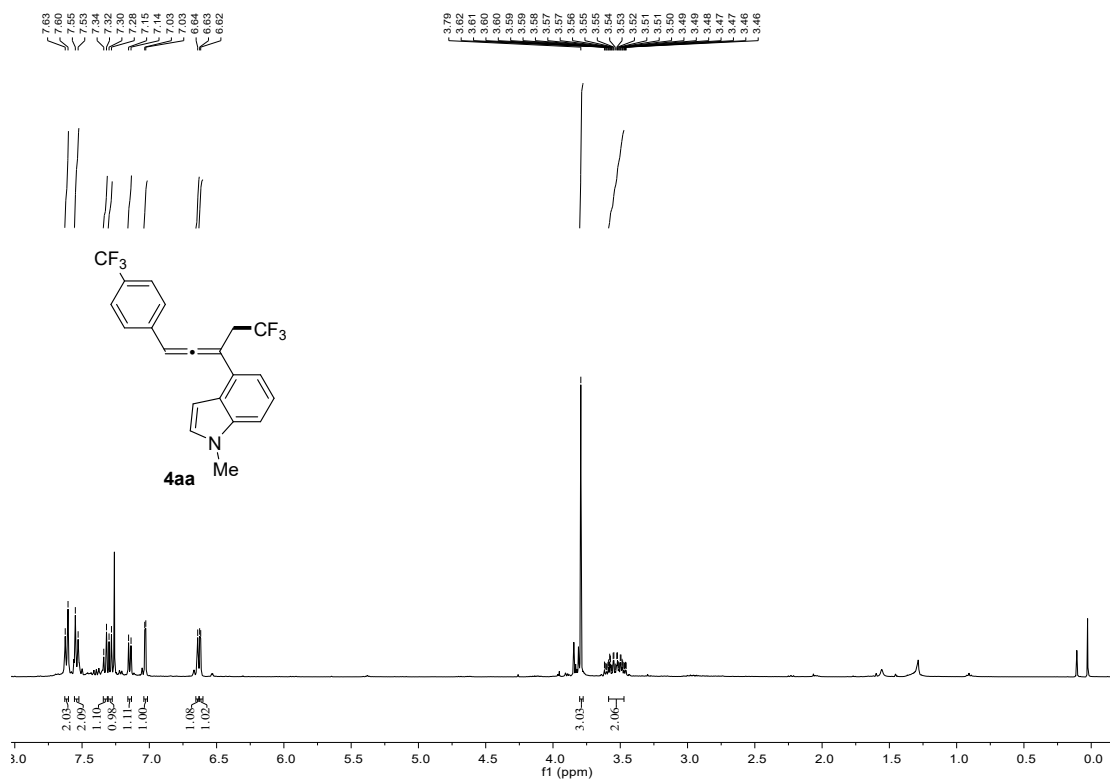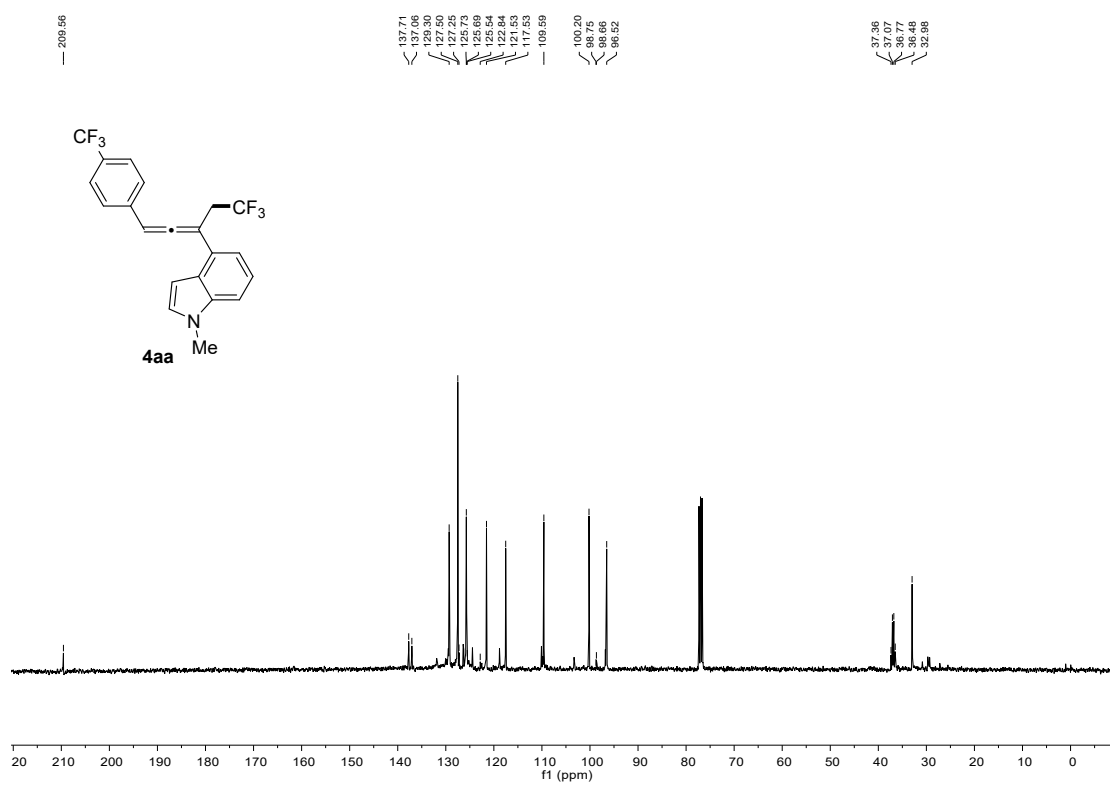

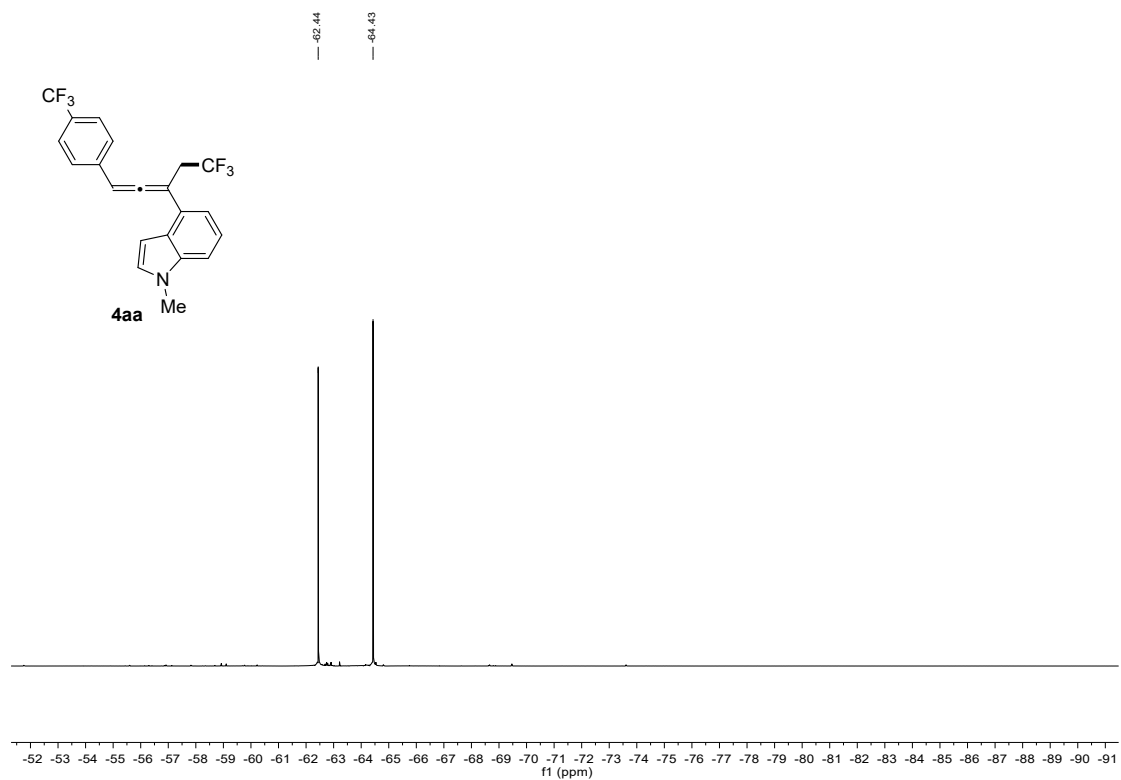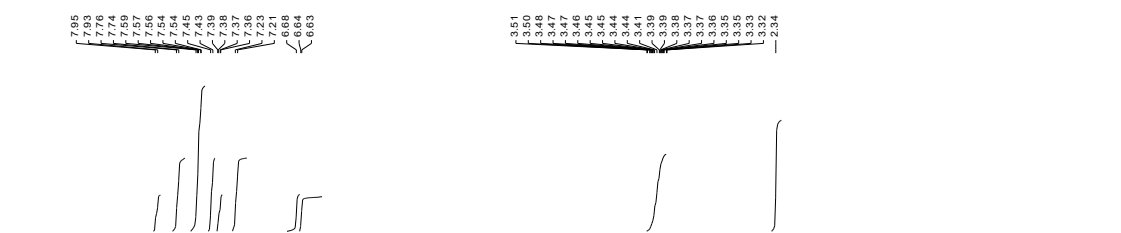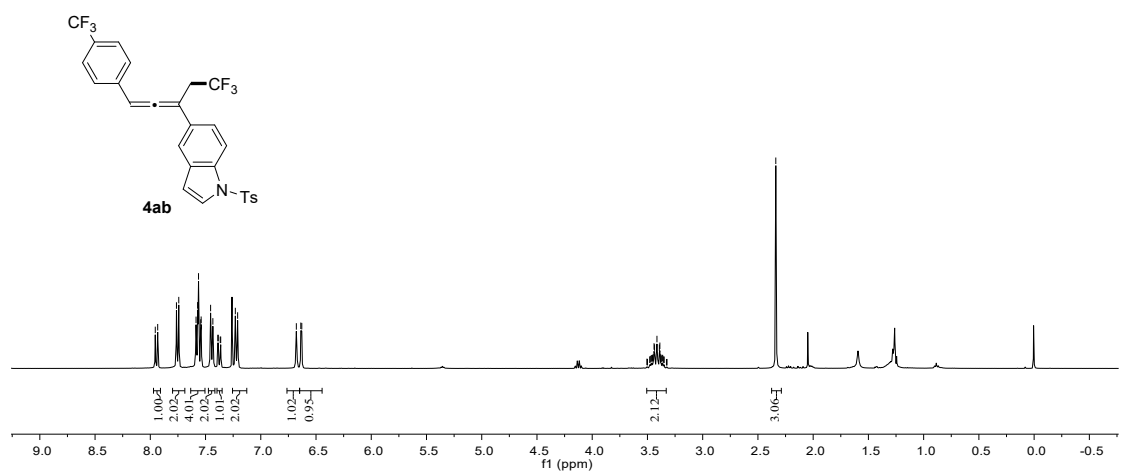

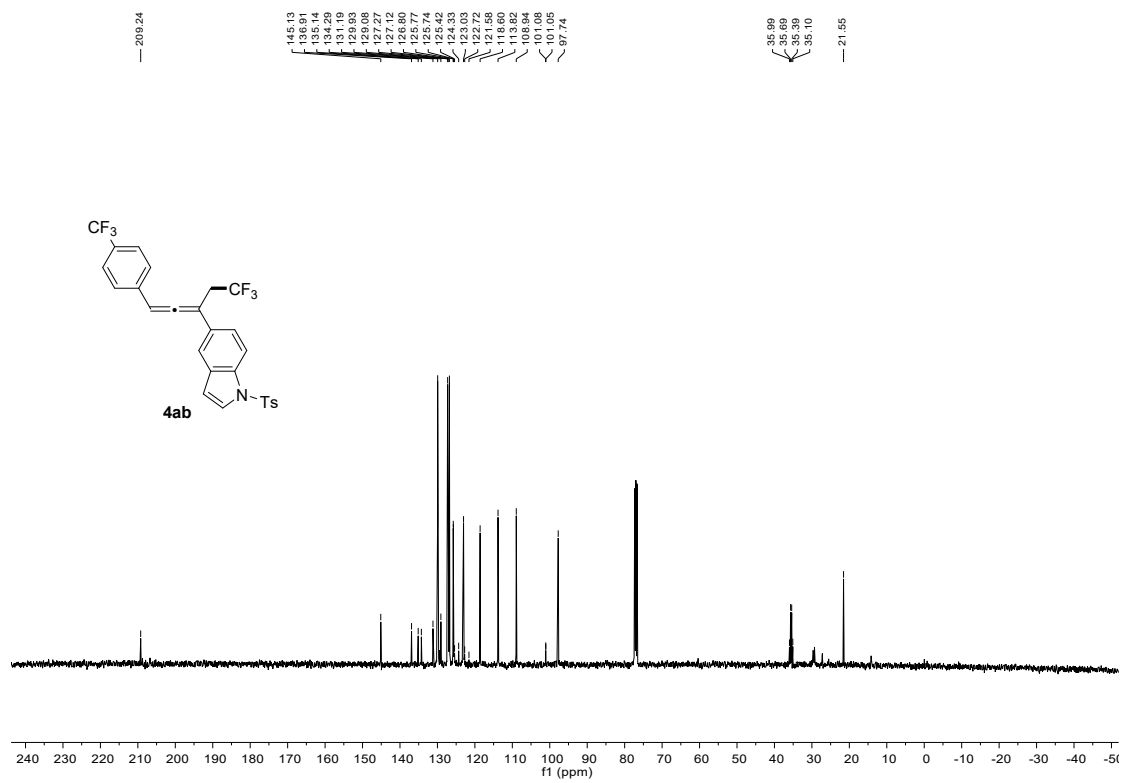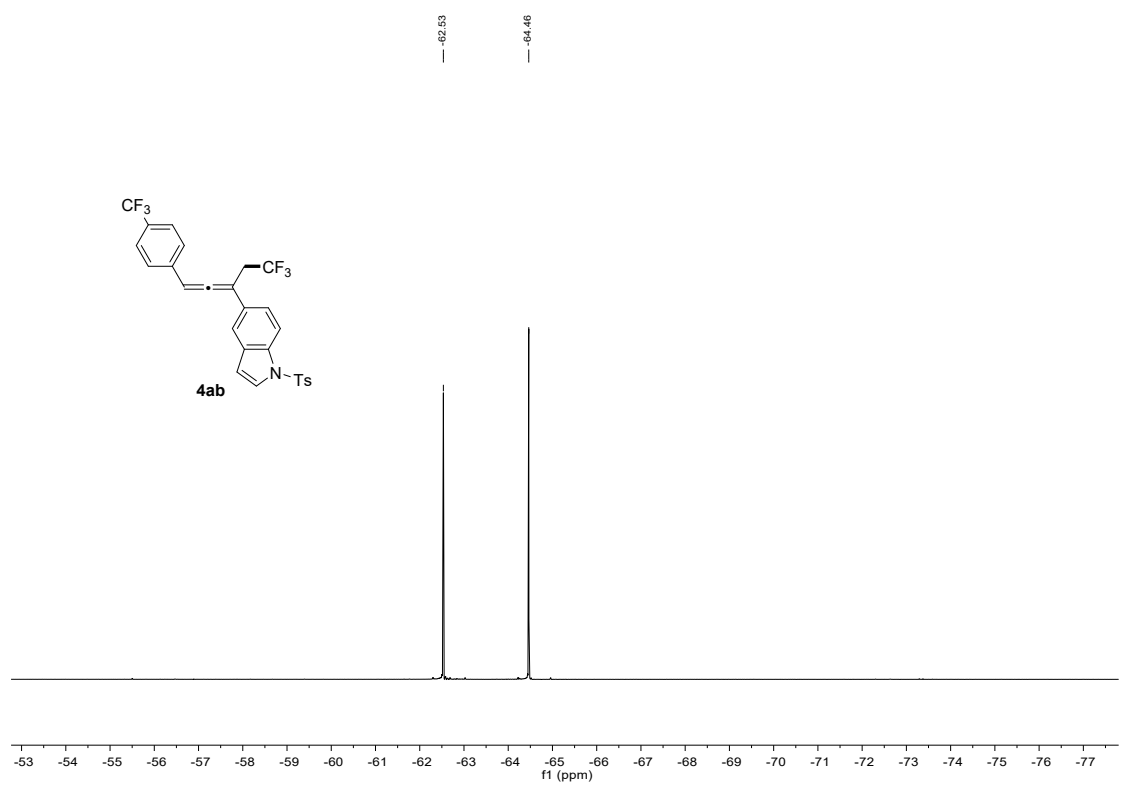

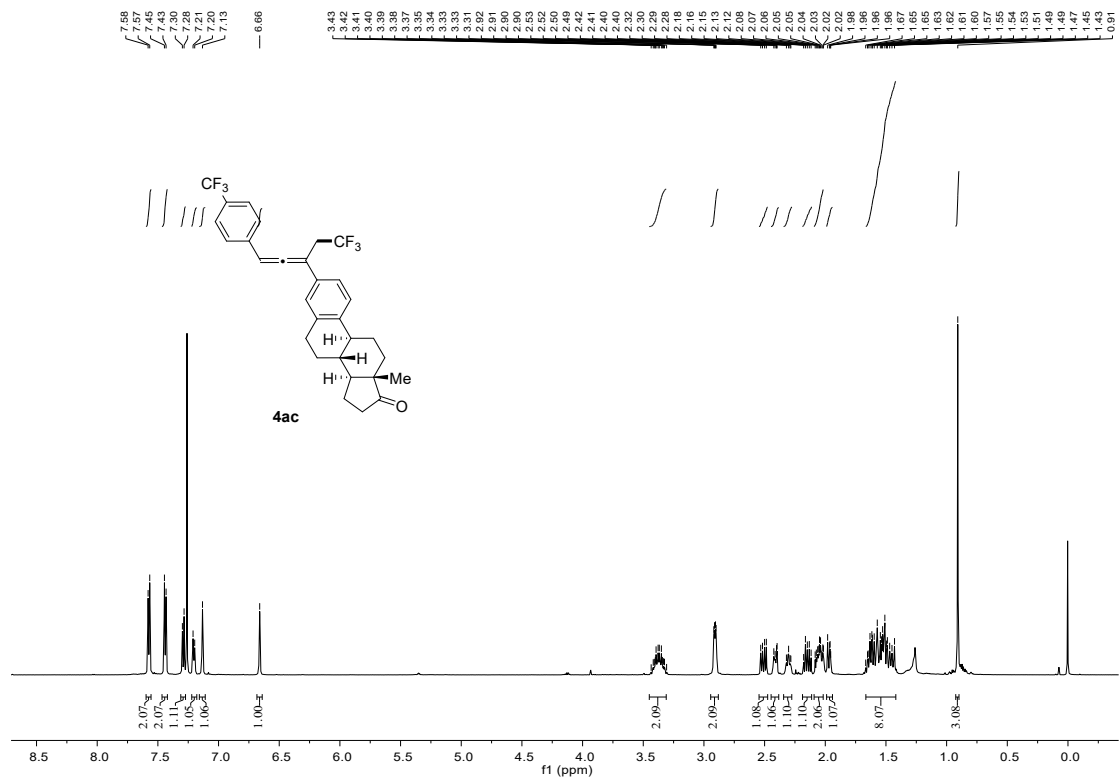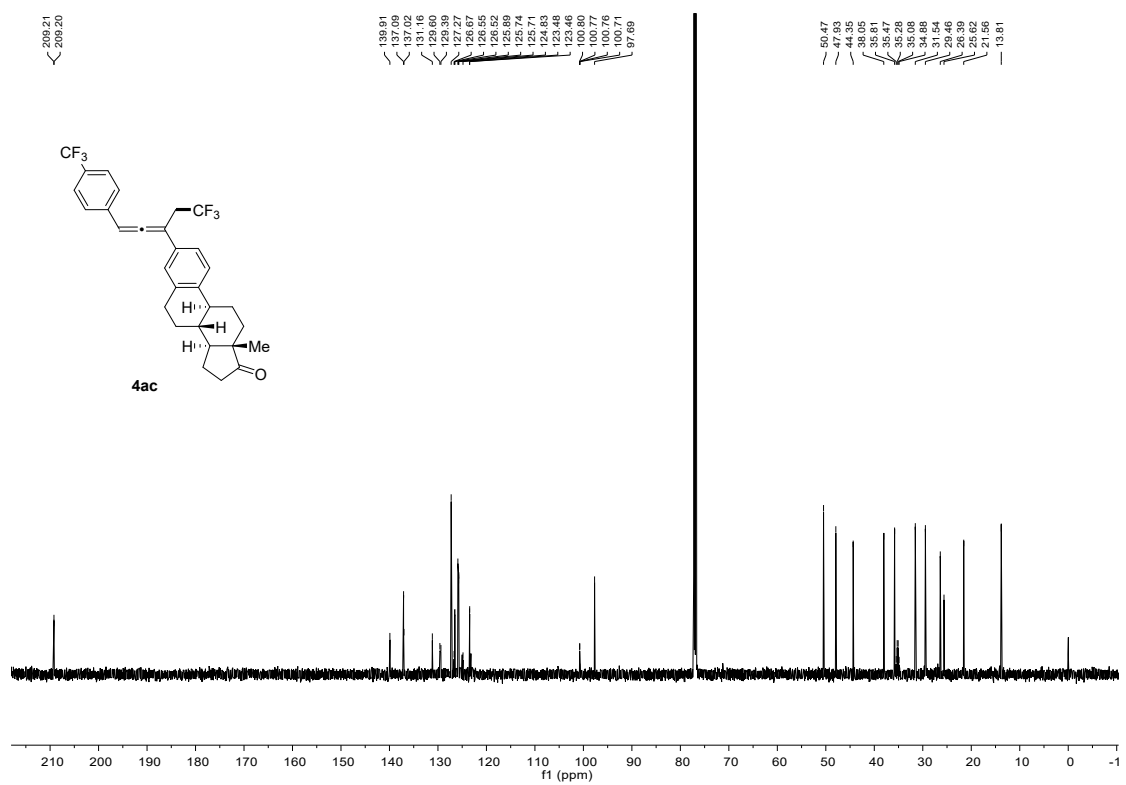



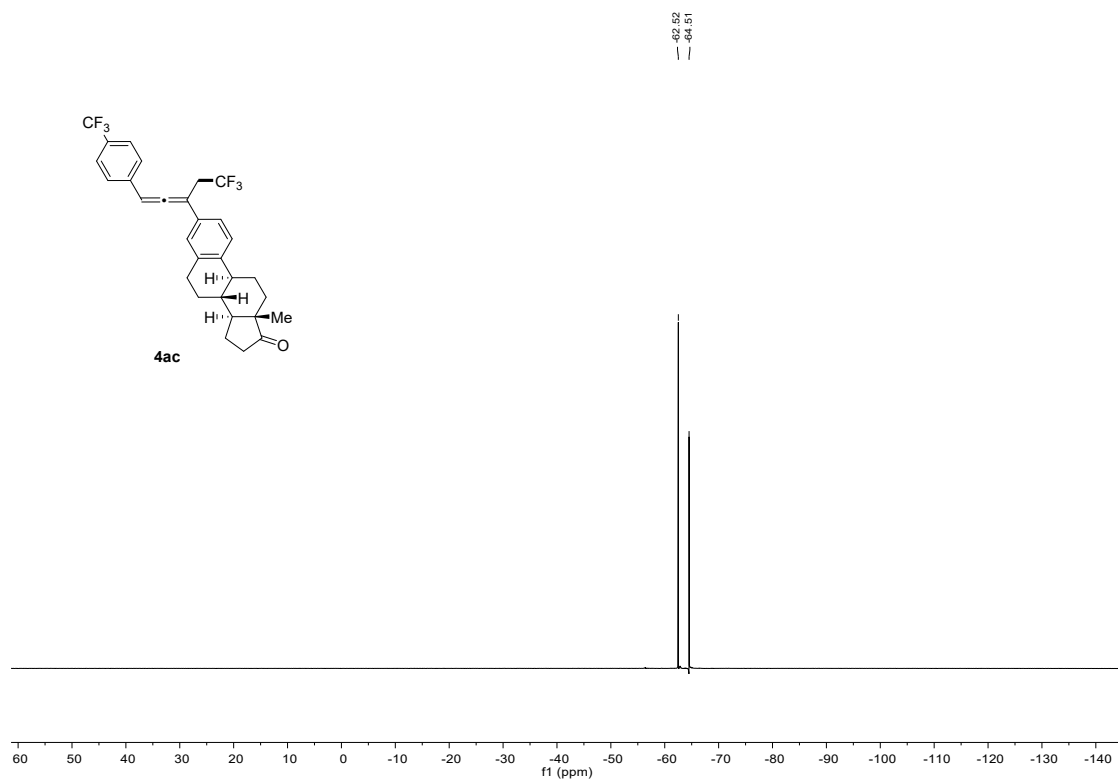

Supplement: d1qo01823j1.pdf [file d1qo01823j1.pdf]
